# Supplementary material for: Replacing DMF in solid-phase peptide synthesis: varying the composition of green binary solvent mixtures as a tool to mitigate common side-reactions
Source: Royal Society of Chemistry journal article supplement (doi:10.1039/d1gc00604e), 2021-01-01
Supplement: d1gc00604e1.pdf [file d1gc00604e1.pdf]

## Supporting Information

### Replacing DMF in solid-phase peptide synthesis: Varying the composition of green binary solvent mixtures as a tool to mitigate common side-reactions

Sandip Jadhav,<sup>a,†</sup> Vincent Martin,<sup>b,†</sup> Peter H. G. Egelund,<sup>b,†</sup> Henrik Johansson Castro,<sup>b</sup> Tobias Krüger,<sup>a</sup> Franziska Richner,<sup>a</sup> Sebastian Thordal Le Quement,<sup>b</sup> Fernando Albericio,<sup>c,d</sup> Frank Dettner,<sup>a</sup> Carolin Lechner,<sup>a</sup> Ralph Schönleber,<sup>a</sup> Daniel Sejer Pedersen<sup>b</sup>

<sup>a</sup> Bachem AG, Hauptstrasse 144, 4416 Bubendorf, Switzerland

<sup>b</sup> Novo Nordisk A/S, CMC API Development, Novo Allé, DK-2880 Bagsværd, Denmark

<sup>c</sup> School of Chemistry and Physics, University of KwaZulu-Natal, University Road, Westville, Durban, South Africa

<sup>d</sup> CIBER-BBN, Networking Centre on Bioengineering, Biomaterials and Nanomedicine, and Department of Organic Chemistry, University of Barcelona, Barcelona, Spain

<sup>†</sup> These authors contributed equally as first authors.

## Table of Contents

|                                                                                                                      |    |
|----------------------------------------------------------------------------------------------------------------------|----|
| 1. General information.....                                                                                          | 3  |
| 1.1 HPLC, UPLC, and LC-MS instruments and methods .....                                                              | 3  |
| 2. Supplementary Figures – Reaction Mechanisms.....                                                                  | 4  |
| 3. Experimental methods and results.....                                                                             | 6  |
| 3.1 Amino acid stability.....                                                                                        | 6  |
| 3.2 Automated SPPS of Bivalirudin on 7.5 mmol scale .....                                                            | 7  |
| 3.3 Arg-lactamisation .....                                                                                          | 7  |
| 3.4 Diketopiperazine formation .....                                                                                 | 7  |
| 3.5 Aspartimide formation (with OMpe aspartyl protection) .....                                                      | 10 |
| 3.6 Aspartimide formation (with OtBu aspartyl protection) .....                                                      | 11 |
| 3.7 Amino acid racemisation .....                                                                                    | 14 |
| 4. Chromatograms.....                                                                                                | 14 |
| 4.2 Arg-lactamisation .....                                                                                          | 20 |
| 4.3 Aspartimide formation (with OMpe aspartyl protection) .....                                                      | 21 |
| 4.4 Aspartimide formation without Oxyma Pure (with OtBu aspartyl protection) .....                                   | 24 |
| 4.5 Aspartimide formation with Oxyma Pure (with OtBu aspartyl protection) .....                                      | 33 |
| 4.6 Aspartimide formation with Oxyma Pure (with OtBu aspartyl protection) ( $\alpha$ - $\beta$ -isomerisation) ..... | 42 |
| 4.7 Amino acid racemisation .....                                                                                    | 78 |

## 1. General information

All reagents and solvents were obtained from standard suppliers of raw materials for peptide synthesis and were used as received. All reactions were carried out under ambient temperature.

### 1.1 HPLC, UPLC, and LC-MS instruments and methods

Analytical HPLC was performed on Thermo Scientific™ Vanquish™ UHPLC system using AQUITY UPLC BEH 130 C18 (1.7  $\mu\text{m}$ , 2.1  $\times$  150 mm) column, with a flow rate of 0.4 mL/min and UV detection at 220 nm. The MS analysis was performed on UHPLC coupled with Bruker maXis II™ spectrometer with ultra-high resolution QTOF technology equipped with electron-transfer dissociation (ETD) capabilities. Buffer A: 0.05% TFA in MeCN/H<sub>2</sub>O (1:99), v/v/v and buffer B: 0.05% TFA in MeCN, v/v. **Method A:** 0%-100% B in 30 min. **Method B:** 30%-100% B in 20 min. **Method C:** 5%-30% B in 12 min.

Analytical HPLC was performed on Waters Acquity UPLC H-Class using Waters Column Acquity BEH UPLC C18 1.7  $\mu\text{m}$ , 2.1  $\times$  50 mm with a flowrate of 0.5 mL/min and UV detection at 214 nm and 280 nm. Buffer A: 0.1% TFA in MeCN/H<sub>2</sub>O (10:90), v/v/v Buffer B: 0.1% TFA in MeCN/H<sub>2</sub>O (90:10), v/v/v. **Method D:** 0-100% B in 6 min. **Method E:** 5-100% B in 7.5 min. **Method F:** 0-85% B in 7.5 min.

Analytical HPLC was performed on Waters Acquity UPLC H-Class using Waters Column Acquity BEH UPLC C18 1.7  $\mu\text{m}$ , 2.1  $\times$  50 mm with a flowrate of 0.5 mL/min and UV detection at 214 nm. Buffer A: 0.1% TFA in H<sub>2</sub>O, v/v/v. Buffer B: 0.1% TFA in MeCN/H<sub>2</sub>O (90:10), v/v/v. **Method G:** 0-12.5% in 4 min and then isocratic for 15 min.

Analytical HPLC was performed on Thermo Scientific™ Scientific Ultimate UHPLC system using Kinetex UPLC column C18 100Å 1.7  $\mu\text{m}$ , 150  $\times$  2.1 mm, with a flow rate of 0.5 mL/min and UV detection at 210 nm. The MS analysis was performed on MSQ Plus Mass spectrometer, operating in positive mode ESI. Buffer A: 0.1% HCOOH in MeCN/H<sub>2</sub>O (10:90), v/v/v. Buffer B: 0.1% HCOOH in MeCN/H<sub>2</sub>O (90:10), v/v/v. **Method H:** 0-60% B in 12 min followed by 60-100% B in 2 min.

## 2. Supplementary Figures - Reaction Mechanisms

### Step 1

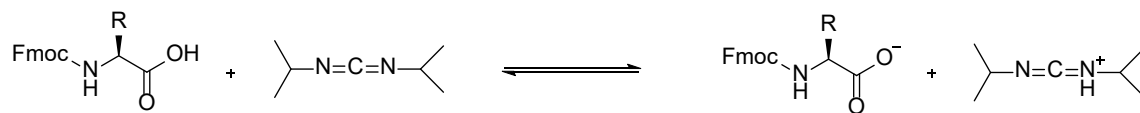

### Step 2

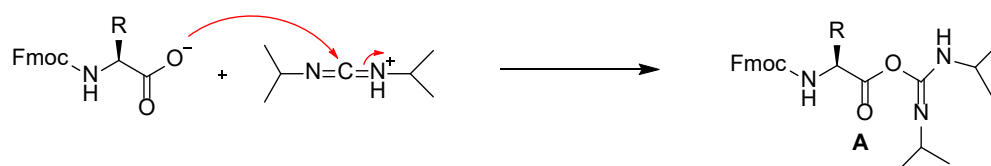

### Step 3

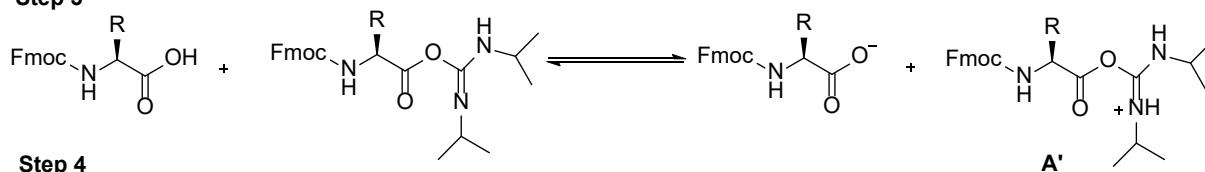

### Step 4

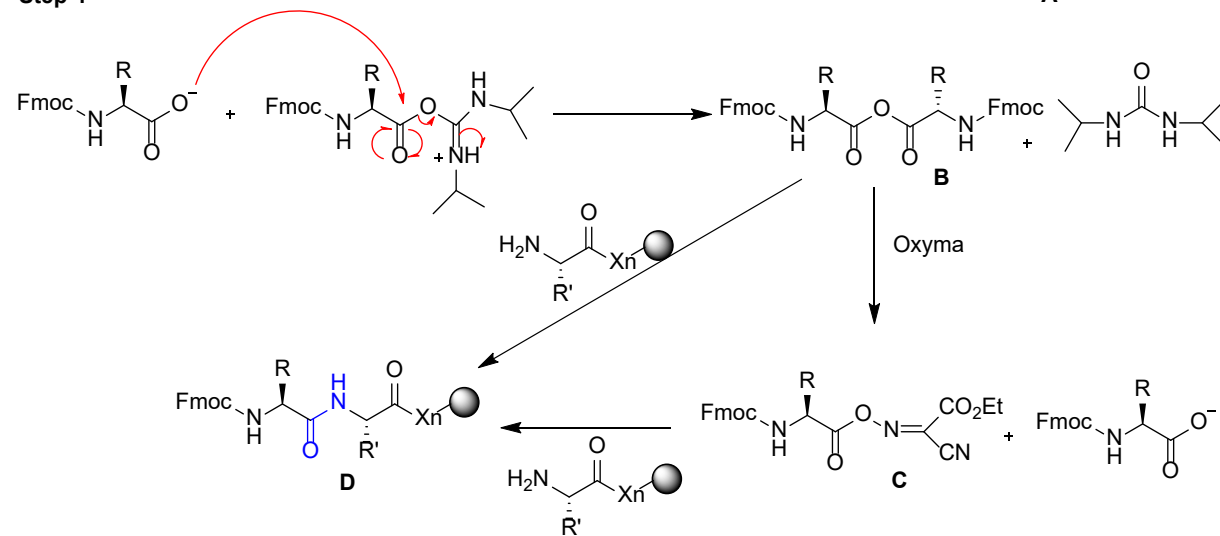

**Supplementary Figure S1.** Plausible reaction mechanism of DIC/Oxyma-mediated amide bond formation in SPPS

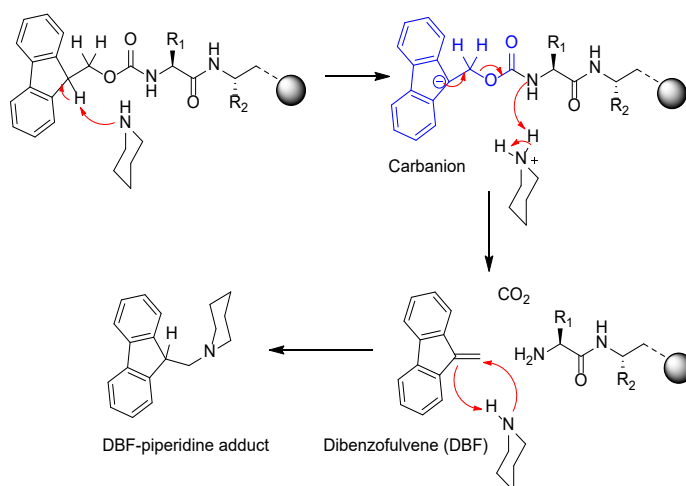

**Supplementary Figure S2.** Plausible mechanism (E1cB) of piperidine mediated Fmoc-removal

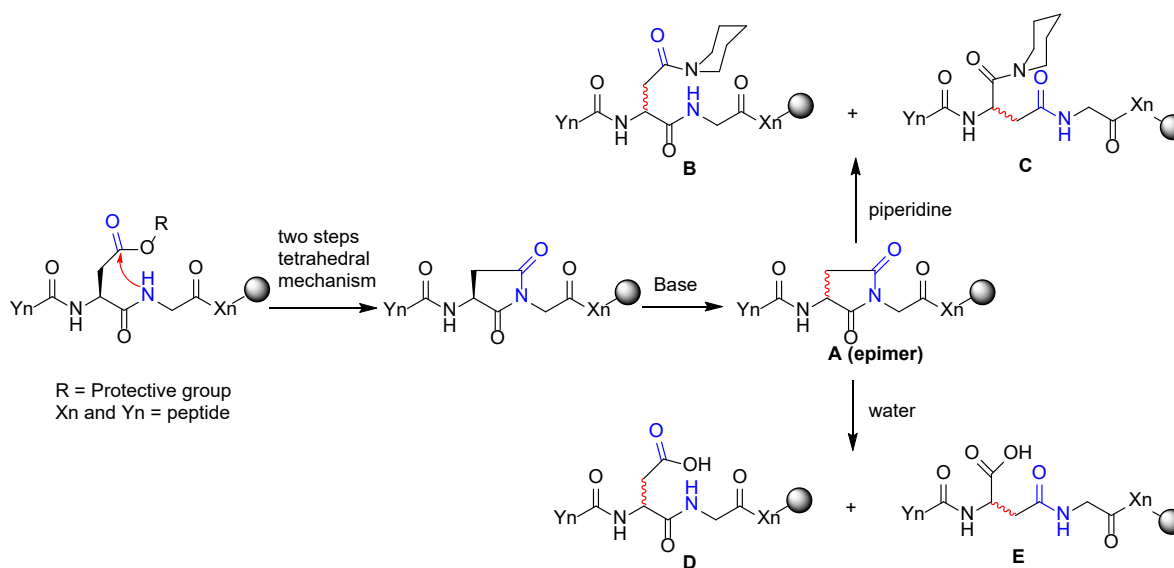

**Supplementary Figure S3.** Aspartimide formation and the subsequent epimerisation,  $\alpha$ - $\beta$ -peptide isomerisation, and  $\alpha$ - $\beta$ -piperidide formation during SPPS

### 3. Experimental methods and results

#### 3.1 Amino acid stability

A solution of Fmoc-amino acids containing Oxyma Pure (0.3 M each) was kept sealed for 14 days, after which 10  $\mu$ L was extracted, diluted with 1 mL MeCN/H<sub>2</sub>O/TFA (50/50/0.1, v/v/v) and analysed by HPLC (Method D) at 214 nm. The results were divided into three categories, no apparent change (>99% remaining Fmoc-amino acid), minor degradation (95-99%) and significant degradation (<95%) (Supplementary Table S1). The most common degradation products were loss of side chain protecting groups or oxidation.

**Supplementary Table S1.** Remaining (%) Fmoc-amino acids after 14 days in the designated solvent containing OxymaPure (0.3 M). Initial Fmoc-amino acid concentration 0.3 M<sup>[a]</sup>

| Fmoc-AA-OH        | DMF  | DMSO/2-Me-THF (3:7) | DMSO/EtOAc (4:6) | DMSO/DOL (3:7) | NBP/DOL (4:6) | NFM/DOL (2:8) |
|-------------------|------|---------------------|------------------|----------------|---------------|---------------|
| Fmoc-Ala-OH       | >99% | >99%                | >99%             | >99%           | >99%          | >99%          |
| Fmoc-Cys(Trt)-OH  | 99%  | >99%                | 97%              | >99%           | >99%          | 98%           |
| Fmoc-Asp(OtBu)-OH | >99% | >99%                | >99%             | >99%           | >99%          | >99%          |
| Fmoc-Glu(OtBu)-OH | >99% | >99%                | >99%             | >99%           | >99%          | >99%          |
| Fmoc-Phe-OH       | >99% | 99%                 | >99%             | 97%            | >99%          | >99%          |
| Fmoc-His(Trt)-OH  | 88%  | 96%                 | 95%              | Insoluble      | Insoluble     | Insoluble     |
| Fmoc-His(Boc)-OH  | 73%  | 80%                 | 77%              | 78%            | 76%           | 74%           |
| Fmoc-Ile-OH       | >99% | >99%                | >99%             | >99%           | >99%          | >99%          |
| Fmoc-Lys(Boc)-OH  | >99% | >99%                | 97%              | 99%            | >99%          | >99%          |
| Fmoc-Met-OH       | >99% | 99%                 | 99%              | 94%            | 95%           | 99%           |
| Fmoc-Asn(Trt)-OH  | >99% | >99%                | >99%             | >99%           | >99%          | >99%          |
| Fmoc-Pro-OH       | >99% | >99%                | 97%              | >99%           | >99%          | >99%          |
| Fmoc-Gln(Trt)-OH  | >99% | >99%                | 98%              | >99%           | >99%          | >99%          |
| Fmoc-Arg(Pbf)-OH  | >99% | >99%                | >99%             | >99%           | >99%          | >99%          |
| Fmoc-Ser(tBu)-OH  | 99%  | >99%                | 98%              | >99%           | >99%          | >99%          |
| Fmoc-Thr(tBu)-OH  | >99% | >99%                | 95%              | >99%           | >99%          | >99%          |
| Fmoc-Trp(Boc)-OH  | 99%  | 99%                 | 99%              | 99%            | 95%           | 96%           |
| Fmoc-Tyr(tBu)-OH  | >99% | >99%                | >99%             | 99%            | 98%           | 99%           |

<sup>[a]</sup> Green: >99% remaining Fmoc-amino acid. Yellow: 99-95% remaining Fmoc-amino acid. Red: <95% remaining Fmoc-amino acid. Grey: The Fmoc-amino acid was not fully soluble at 0.3 M in this solvent mixture.

### 3.2 Automated SPPS of Bivalirudin on 7.5 mmol scale

- Bivalirudin (H-fPRPGGGGNGDFEEIPEEYL-OH)

The synthesis of Bivalirudin was carried out on 7.5 mmol scale using an automated synthesizer (Sonata, Gyros Protein Technologies). H-Leu-2-CTR resin (9.26 g, loading 0.81 mmol/g) was pre-swelled in the indicated binary solvent mixture. Fmoc-protected amino acid derivatives (2 equiv.) were pre-activated for 5 min using DIC/Oxyma (2 equiv. each) and the resin was treated with the reagent mixture for 90 min, except for tyrosine which was coupled using a TBTU/DIPEA (2 and 4 equiv. respectively) activation protocol. At the end of each coupling reaction, the resin was drained and capped using a solution (150 mL) of Ac<sub>2</sub>O and collidine in the candidate solvent. The resin was then filtered and washed with the indicated solvent. Fmoc-removal was carried out using a solution of 20% (v/v) piperidine in the corresponding solvent (10 + 5 min). After the final cycle, the resin was washed with the indicated solvent (150 mL) and IPA (150 mL) and dried under vacuum before the resin weight gain was calculated. The dry resin (100 mg) was treated with TFA/H<sub>2</sub>O (95:5, v/v; 1 mL) for 2 h at ambient temperature. The cleavage solution was filtered, and the crude peptide was precipitated as a white to off-white powder using cold DIPE. The obtained crude peptide was subjected to HPLC and LC-MS analysis (Method A).

### 3.3 Arg-lactamisation

DIC (157 µL, 1 mmol) was added to a solution of Fmoc-Arg(Pbf)-OH (649 mg, 1 mmol) and Oxyma Pure (142 mg, 1 mmol) in the candidate solvent (10 mL). The reaction was allowed to stir for 90 min at ambient temperature. After 90 min, the reaction mixture (3 µL) was diluted to 1 mL with MeOH. The solution in MeOH was vortexed for 30 seconds and directly subjected to HPLC analysis (Method B).

### 3.4 Diketopiperazine (DKP) formation

H-Arg(Pbf)-OH was dissolved in MeCN/H<sub>2</sub>O/TFA (50/50/0.1, v/v/v) at five different concentrations with five samples at each concentration HPLC analysis (Method E) at 280 nm was used to determine the area under the curve (Supplementary Table S2), and the data was plotted to generate a standard curve for the absorption of H-Arg(Pbf)-OH (Supplementary Figure S4).. The standard curve was then used to determine the concentration of DKP formed from Fmoc-Arg(Pbf)-Gly-Wang-resin, assuming similar absorption of H-Arg(Pbf)-OH and the Arg(Pbf)-Gly DKP.

**Supplementary Table S2.** Measured AUC at 280 nm for various concentrations of H-Arg(Pbf)-OH

| Concentration (mM) | Area 1 ( $\mu\text{V} \times \text{sec}$ ) | Area 2 ( $\mu\text{V} \times \text{sec}$ ) | Area 3 ( $\mu\text{V} \times \text{sec}$ ) | Area 4 ( $\mu\text{V} \times \text{sec}$ ) | Area 5 ( $\mu\text{V} \times \text{sec}$ ) | Area Avg. ( $\mu\text{V} \times \text{sec}$ ) |
|--------------------|--------------------------------------------|--------------------------------------------|--------------------------------------------|--------------------------------------------|--------------------------------------------|-----------------------------------------------|
| 0.01               | 2607                                       | 2648                                       | 2570                                       | 2457                                       | 2621                                       | 2581                                          |
| 0.025              | 6475                                       | 6126                                       | 6548                                       | 6608                                       | 6275                                       | 6406                                          |
| 0.05               | 12963                                      | 12866                                      | 13009                                      | 12767                                      | 12962                                      | 12913                                         |
| 0.075              | 19979                                      | 19701                                      | 19768                                      | 19875                                      | 19603                                      | 19785                                         |
| 0.1                | 26673                                      | 26057                                      | 26232                                      | 26320                                      | 25287                                      | 26114                                         |

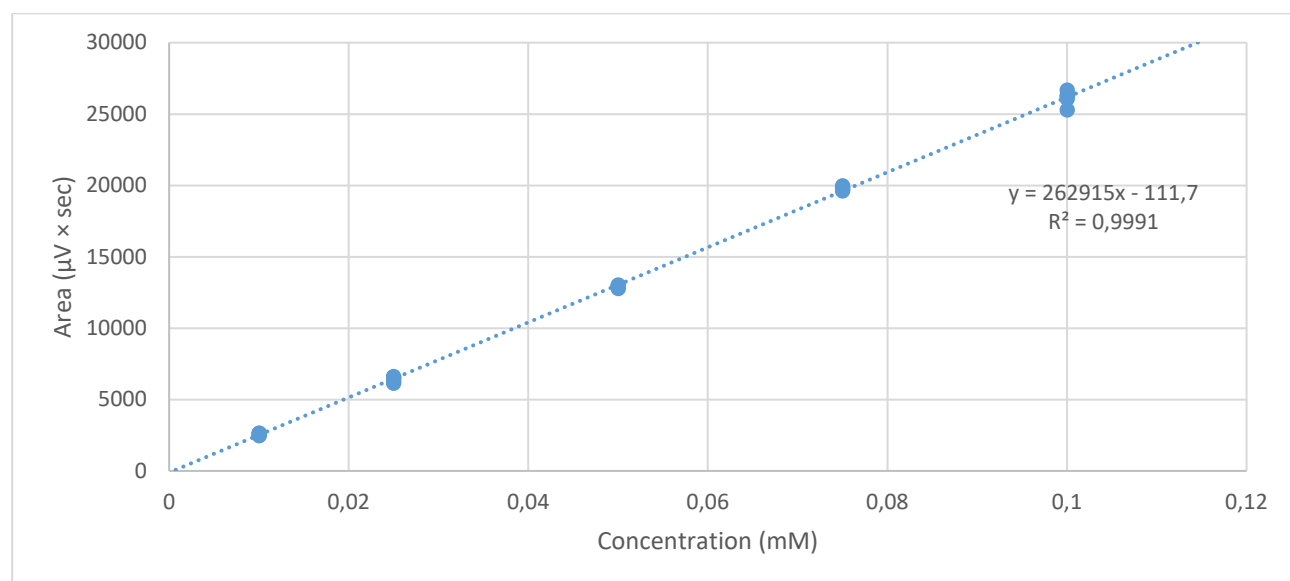

**Supplementary Figure S4.** Standard curve for the measured AUC at 280 nm as a function of the concentration of H-Arg(Pbf)-OH

The candidate solvent (8 mL/g resin) was added to Fmoc-Arg(Pbf)-Gly-Wang-resin (~30 mg, loading 0.47 mmol/g) which was swelled for 60 min at ambient temperature. Base (2 mL/g resin) was added the mixture left shaking for another 10 or 30 min (Supplementary Table S3). Reaction mixture (10  $\mu\text{L}$ ) was extracted and diluted with MeCN/H<sub>2</sub>O/TFA (75/25/0.1, v/v/v; 490  $\mu\text{L}$ ) and analysed by HPLC (Method E) at 280 nm. All experiments were carried out in duplicate or more (Supplementary Table S4). When used as base, 4-Me-piperidine was in some solvents able to react with the ester linkage and form an adduct (Supplementary



Figure S5). This was only observed in a few cases, and consisted of less than 1% by-product compared to DKP.

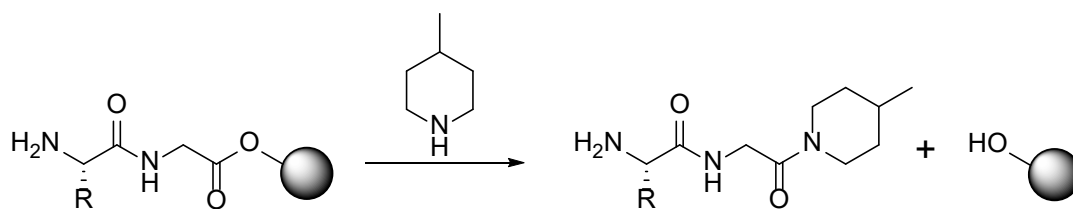

**Supplementary Figure S5.** Reaction between H-Arg(Pbf)-Gly-O-Wang resin and 4-Me-piperidine

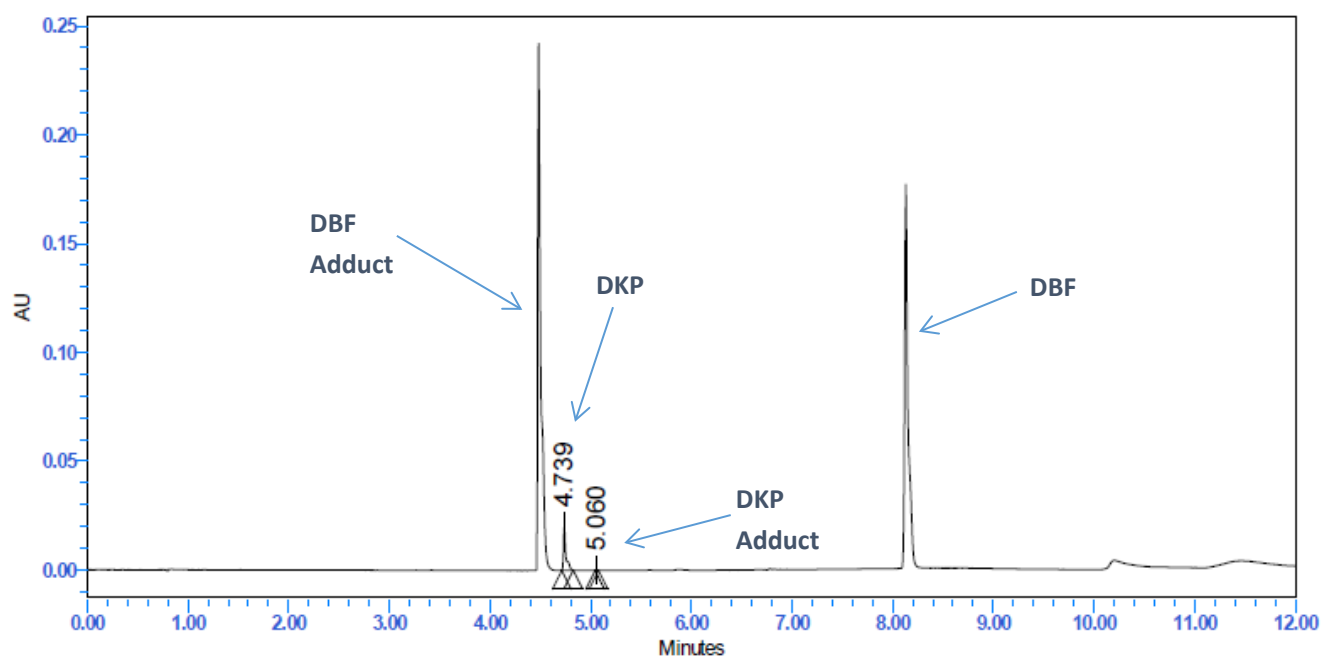

**Peak Results**

|   | Name | RT    | Area  | Height | Amount | % Area |
|---|------|-------|-------|--------|--------|--------|
| 1 |      | 4.739 | 33034 | 20508  |        | 98.91  |
| 2 |      | 5.060 | 364   | 385    |        | 1.09   |

**Supplementary Figure S6.** DKP-formation. HPLC analysis ( $\lambda = 280$  nm) after 30 min deprotection with piperidine in DMF.

**Supplementary Table S3.** Conditions for DKP formation on Fmoc-Arg(Pbf)-Gly-Wang-PS resin

|  | Method A | Method B | Method C |
|--|----------|----------|----------|
|  |          |          |          |

| Time (min) | 30         | 30              | 10         |
|------------|------------|-----------------|------------|
| Base       | Piperidine | 4-Me-Piperidine | Piperidine |

**Supplementary Table S4.** DKP formation for Fmoc-Arg(Pbf)-Gly-Wang-PS resin in binary solvent mixtures and DMF

| Solvent             | Method A                                                   |       | Method B                                                   |       | Method C                                                   |      |
|---------------------|------------------------------------------------------------|-------|------------------------------------------------------------|-------|------------------------------------------------------------|------|
|                     | Area<br>( $\mu\text{V} \times \text{sec}$ ) <sup>[a]</sup> | %DKP  | Area<br>( $\mu\text{V} \times \text{sec}$ ) <sup>[a]</sup> | %DKP  | Area<br>( $\mu\text{V} \times \text{sec}$ ) <sup>[a]</sup> | %DKP |
| DMF                 | 30514                                                      | 16.12 | 27422                                                      | 14.49 | 11027                                                      | 5.82 |
|                     | 33398                                                      | 17.64 | 31145                                                      | 16.45 | 12919                                                      | 6.82 |
| DMSO/2-Me-THF (3:7) | 42443                                                      | 22.42 | 40037                                                      | 21.15 | 15203                                                      | 8.03 |
|                     | 46604                                                      | 24.62 | 39077                                                      | 20.64 | 15821                                                      | 8.36 |
| DMSO/2-Me-THF (4:6) | 41142                                                      | 21.73 | 46355                                                      | 24.29 | 16624                                                      | 8.78 |
|                     | 41499                                                      | 21.92 | 36167                                                      | 19.11 | 16507                                                      | 8.72 |
| DMSO/EtOAc (4:6)    | 52574                                                      | 27.77 | 50791                                                      | 26.83 | 13880                                                      | 7.33 |
|                     | 35638                                                      | 18.83 | 54010                                                      | 28.53 | 14811                                                      | 7.82 |
| DMSO/EtOAc (6:4)    | 43637                                                      | 23.05 |                                                            |       |                                                            |      |
|                     | 19437                                                      | 10.27 | 29037                                                      | 15.34 | 12617                                                      | 6.67 |
| DMSO/DOL (3:7)      | 28984                                                      | 15.31 | 33330                                                      | 17.61 | 11999                                                      | 6.34 |
|                     | 33544                                                      | 17.72 | 37517                                                      | 19.82 | 13231                                                      | 6.99 |
| DMSO/DOL (4:6)      | 28936                                                      | 15.29 | 31979                                                      | 16.89 | 11733                                                      | 6.20 |
|                     | 34709                                                      | 18.34 | 31845                                                      | 16.82 | 11716                                                      | 6.19 |
| NBP/DOL (4:6)       | 34549                                                      | 18.25 | 32095                                                      | 16.95 | 12580                                                      | 6.65 |
|                     | 38306                                                      | 20.24 | 32787                                                      | 17.32 | 12673                                                      | 6.69 |
| NFM/DOL (2:8)       | 38969                                                      | 20.59 | 30431                                                      | 16.08 | 9805                                                       | 5.18 |
|                     | 38139                                                      | 20.15 | 37266                                                      | 19.69 | 12741                                                      | 6.73 |
|                     | 34339                                                      | 18.14 | 35977                                                      | 19.00 | 10330                                                      | 5.46 |

<sup>[a]</sup>In cases where the base reacts with the linker and forms an adduct, the area is the sum of the two compounds.

### 3.5 Aspartimide formation (with OMpe aspartyl protection)

The model Scorpion Toxin II peptidyl resin, H-Val-Lys(Boc)-Asp(OMpe)-Gly-Tyr(*t*Bu)-Ile-Wang resin, was synthesised in DMF using standard Fmoc-SPPS chemistry at 4 mmol scale. The dry peptidyl resin (100 mg) was transferred to a syringe (2 mL) fitted with porous frit. The peptidyl resin was swelled ( $2 \times 10$  min) with a candidate solvent. The 1 mL of 20% piperidine (v/v) prepared in the corresponding candidate solvent was added to this pre-swelled peptidyl resin and the reaction was allowed to proceed by agitating the syringe

at ambient temperature. Parallel experiments were performed to simulate the base treatment for different periods (45, 225, and 405 min). At each time point, the piperidine solution was filtered off from the resin and the resin bed was washed ( $3 \times 1$  mL) alternating with DMF and isopropyl alcohol (IPA). Finally, the peptidyl resin was washed again with IPA ( $3 \times 1$  mL). The resin was dried under vacuum overnight and the peptide was cleaved from the resin using a TFA/H<sub>2</sub>O (95:5, v/v; 1 mL) solution for 1.5 h. The crude peptide was precipitated using DIPE (10 mL) and dried under vacuum. The crude peptide (1 mg) was dissolved in 5% AcOH solution and analysed via HPLC (Method C). The untreated peptidyl resin (without piperidine treatment) was used as a reference peptide in this study.

### **3.6 Aspartimide formation (with OtBu aspartyl protection)**

Fmoc-Val-Lys(Boc)-Asp(OtBu)-Gly-Tyr(tBu)-Ile-Wang resin (100 mg, loading 0.60 mmol/g) was swelled in the indicated solvent (1 mL) for 1 h in a 5 mL fritted syringe. A solution of 20% (v/v) piperidine in the indicated solvent (1 mL) was added to the resin, which was agitated for 4 hrs. The solvent was drained, and the resin was washed with DMF ( $4 \times 3$  mL). The peptide was capped with a solution of DMF/Ac<sub>2</sub>O/DIPEA (120:4.73:10.45, v/v/v; 5 mL) for  $2 \times 5$  min. Experiments without Oxyma Pure were performed in triplicates, while the experiments with Oxyma Pure were only performed once. Approximately 10 mg peptide resin was cleaved with TFA/TIPS/H<sub>2</sub>O (95/2.5/2.5, v/v/v; 400  $\mu$ L) for 1 h. Afterwards MeCN (1.2 mL) and 7.0 M NH<sub>4</sub>OAc (0.68 mL) were added, and the sample was filtered and analysed by LC-MS (Method H) at 210 nm.

To quantify the amount of  $\alpha$ - and  $\beta$ -isomers the cleaved peptide samples were analysed by HPLC (Method G) at 214 nm. In order to ensure that no co-elution between the  $\alpha$ - and  $\beta$ -isomer was present, each sample was subsequently co-injected with a reference sample of the  $\beta$ -isomer.

**Supplementary Table S5.** Aspartimide formation without Oxyma Pure

| Solvent             | Target peptide | Aspartimides | Piperidides |
|---------------------|----------------|--------------|-------------|
|                     | 87%            | 6%           | 7%          |
| DMF                 | 85%            | 6%           | 9%          |
|                     | 87%            | 6%           | 7%          |
|                     | 88%            | 4%           | 8%          |
| DMSO/2-Me-THF (3:7) | 88%            | 5%           | 7%          |
|                     | 88%            | 6%           | 6%          |
|                     | 88%            | 6%           | 6%          |
| DMSO/2-Me-THF (4:6) | 88%            | 6%           | 6%          |
|                     | 89%            | 6%           | 5%          |
|                     | 88%            | 5%           | 7%          |
| DMSO/EtOAc (4:6)    | 89%            | 5%           | 6%          |
|                     | 89%            | 4%           | 7%          |
|                     | 87%            | 6%           | 7%          |
| DMSO/EtOAc (6:4)    | 88%            | 7%           | 5%          |
|                     | 87%            | 6%           | 7%          |
|                     | 88%            | 5%           | 7%          |
| DMSO/DOL (3:7)      | 86%            | 4%           | 10%         |
|                     | 90%            | 4%           | 6%          |
|                     | 81%            | 10%          | 9%          |
| DMSO/DOL (4:6)      | 86%            | 6%           | 8%          |
|                     | 88%            | 5%           | 7%          |
|                     | 90%            | 3%           | 7%          |
| NBP/DOL (4:6)       | 90%            | 4%           | 6%          |
|                     | 91%            | 3%           | 6%          |
|                     | 90%            | 3%           | 7%          |
| NFM/DOL (2:8)       | 89%            | 3%           | 8%          |
|                     | 89%            | 5%           | 6%          |

**Supplementary Table S6.** Aspartimide formation with Oxyma Pure

| Solvent             | Target peptide | Aspartimides | Piperidides |
|---------------------|----------------|--------------|-------------|
| DMF                 | 86%            | 9%           | 5%          |
| DMSO/2-Me-THF (3:7) | 88%            | 8%           | 4%          |
| DMSO/2-Me-THF (4:6) | 89%            | 9%           | 2%          |
| DMSO/EtOAc (4:6)    | 90%            | 7%           | 3%          |
| DMSO/EtOAc (6:4)    | 89%            | 7%           | 4%          |
| DMSO/DOL (3:7)      | 93%            | 5%           | 2%          |
| DMSO/DOL (4:6)      | 89%            | 8%           | 3%          |
| NBP/DOL (4:6)       | 92%            | 4%           | 4%          |
| NFM/DOL (2:8)       | 92%            | 4%           | 4%          |

**Supplementary Table S7.** Formation of the  $\beta$ -isomer

| Solvent             | % $\beta$ -isomer without | % $\beta$ -isomer with |
|---------------------|---------------------------|------------------------|
|                     | Oxyma Pure                | 0.1M Oxyma Pure        |
| DMF                 | 0.33%                     | <0.01%                 |
| DMSO/2-Me-THF (3:7) | 0.35%                     | <0.01%                 |
| DMSO/2-Me-THF (4:6) | 0.01%                     | <0.01%                 |
| DMSO/EtOAc (4:6)    | <0.01%                    | <0.01%                 |
| DMSO/EtOAc (6:4)    | <0.01%                    | <0.01%                 |
| DMSO/DOL (3:7)      | <0.01%                    | <0.01%                 |
| DMSO/DOL (4:6)      | <0.01%                    | <0.01%                 |
| NBP/DOL (4:6)       | <0.01%                    | <0.01%                 |
| NFM/DOL (2:8)       | <0.01%                    | <0.01%                 |

### 3.7 Amino acid racemisation

The model peptide, H-Val-Gly-Rink Amide AMPS resin, was synthesised in DMF using standard Fmoc-SPPS chemistry. Coupling of the amino acid, Fmoc-Cys(Trt)-OH, Fmoc-His(Boc)-OH or Fmoc-His(Trt), was carried out manually with 500 mg resin, using a 5 mL fritted syringe at room temperature. The synthesis was undertaken using 3 equiv. of amino acid, DIC and Oxyma Pure dissolved in the investigated solvent (concentration 0.25 M) with 1 min pre-activation. The reaction was shaken for 80 min, with a second addition of 1 equiv. of DIC after 20 min. Fmoc-removal was performed using 20% piperidine in DMF (v/v) solution (2 × 15 min). The peptide was then capped on solid support using a solution of DMF/Ac<sub>2</sub>O/DIPEA (120:4.73:10.45, v/v/v; 5 mL) for 2 × 10 min. Approximately 10 mg peptide resin was cleaved with 400 µL TFA/TIPS/H<sub>2</sub>O (95/2.5/2.5, v/v/v) for 1 h. Afterwards MeCN (1.2 mL) and 7.0 M NH<sub>4</sub>OAc (0.68 mL) were added and the sample was filtered and analysed by HPLC (Method F) at 214 nm. In order to ensure that there was no co-elution of the D- and L-isomers, each sample was subsequently co-injected with a reference sample of the D-isomer.

## 4. Chromatograms

### 4.1 Automated SPPS of Bivalirudin (H-fPRPGGGGNGDFEEIPEEYL-OH) on 7.5 mmol scale

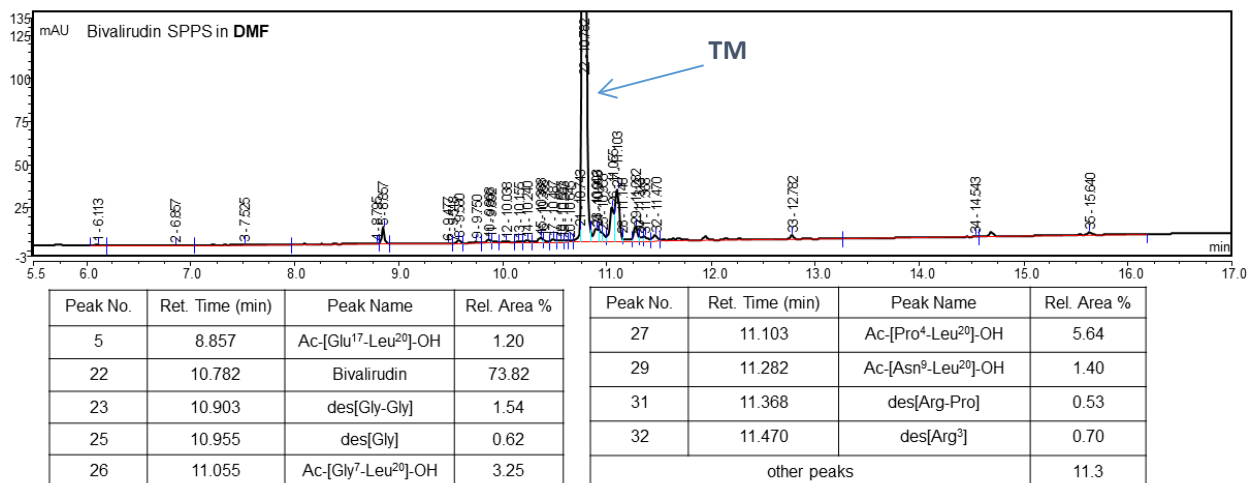

**Supplementary Figure S7.** Chromatogram depicting the impurity profile of Bivalirudin SPPS in DMF. The relative percentage of selected peaks are tabulated.

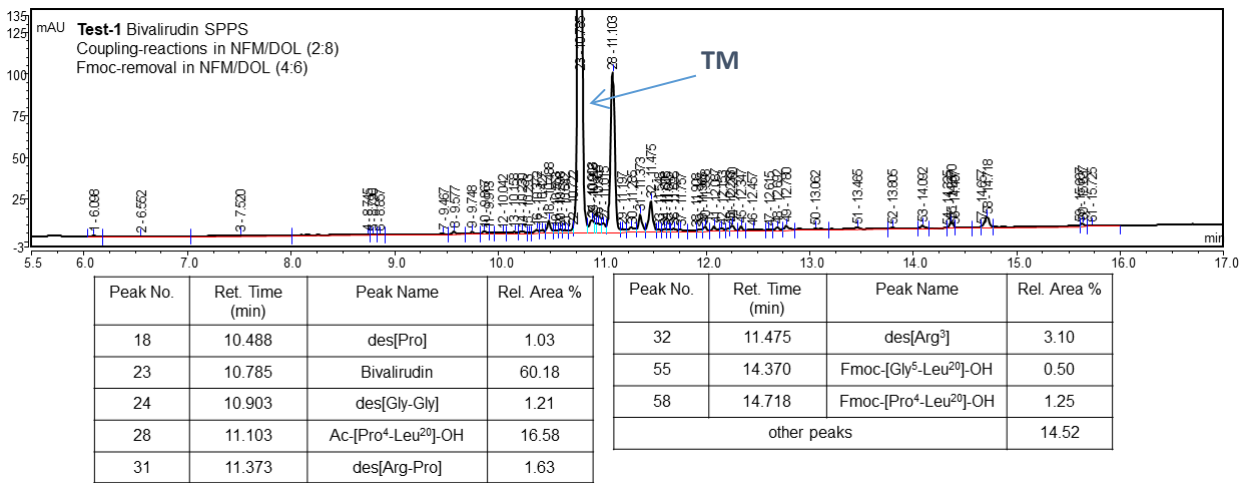

**Supplementary Figure S8.** Chromatogram depicting the impurity profile of Bivalirudin SPPS (entry 1) with coupling reactions in NFM/DOL (2:8) and Fmoc-removal in NFM/DOL (4:6). The relative percentage of selected peaks are tabulated.

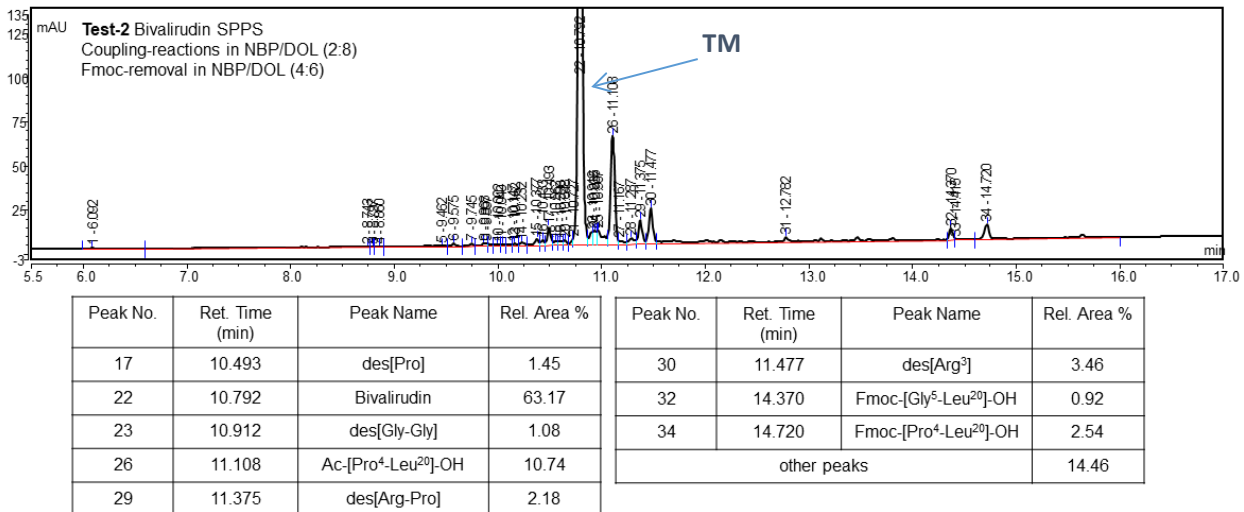

**Supplementary Figure S9.** Chromatogram depicting the impurity profile of Bivalirudin SPPS (entry 2) with coupling reactions in NBP/DOL (2:8) and Fmoc-removal in NBP/DOL (4:6). The relative percentage of selected peaks are tabulated.

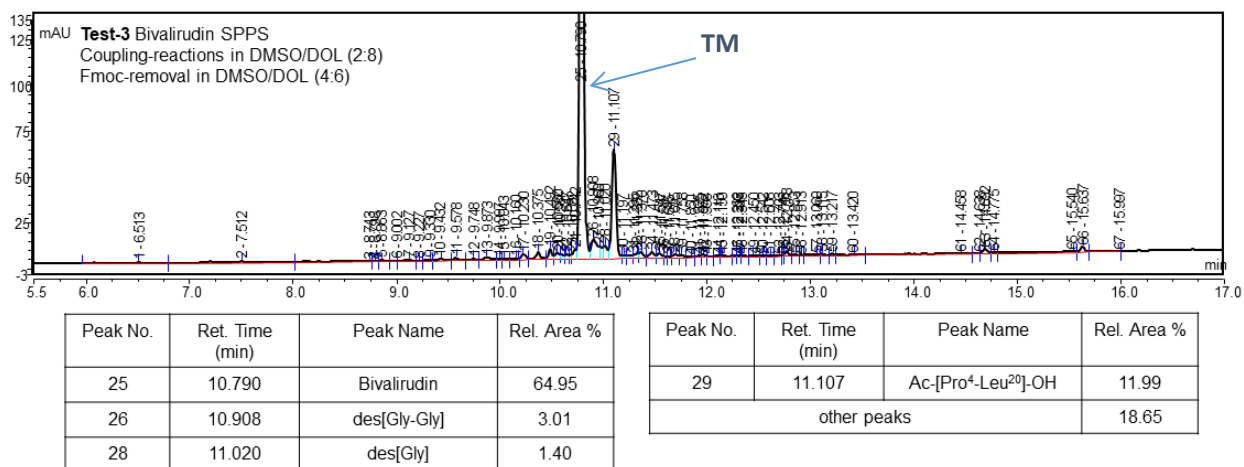

**Supplementary Figure S10.** Chromatogram depicting the impurity profile of Bivalirudin SPPS (entry 3) with coupling reactions in DMSO/DOL (2:8) and Fmoc-removal in DMSO/DOL (4:6). The relative percentage of selected peaks are tabulated.

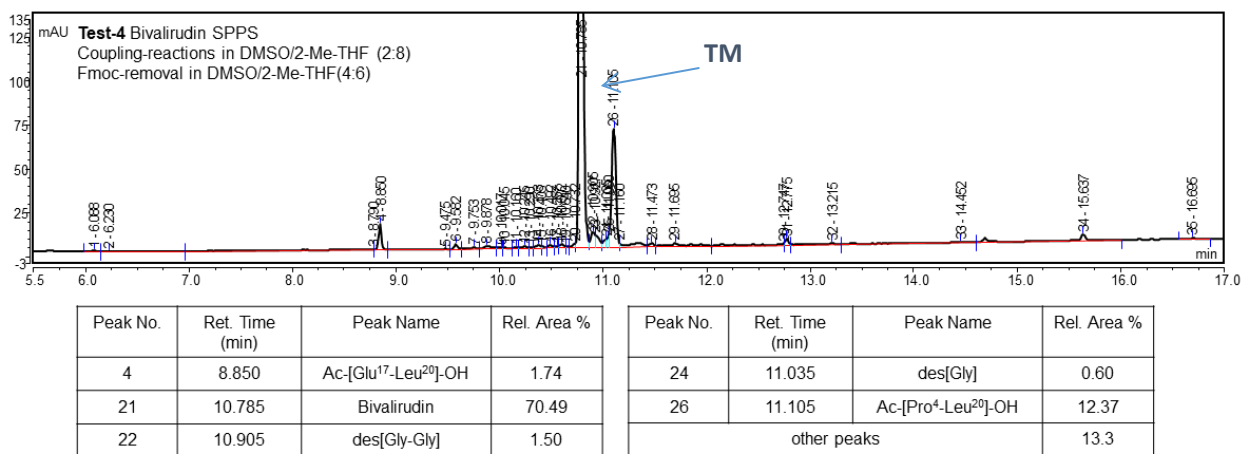

**Supplementary Figure S11.** Chromatogram depicting the impurity profile of Bivalirudin SPPS (entry 4) with coupling reactions in DMSO/2-Me-THF (2:8) and Fmoc-removal in DMSO/2-Me-THF (4:6). The relative percentage of selected peaks are tabulated.



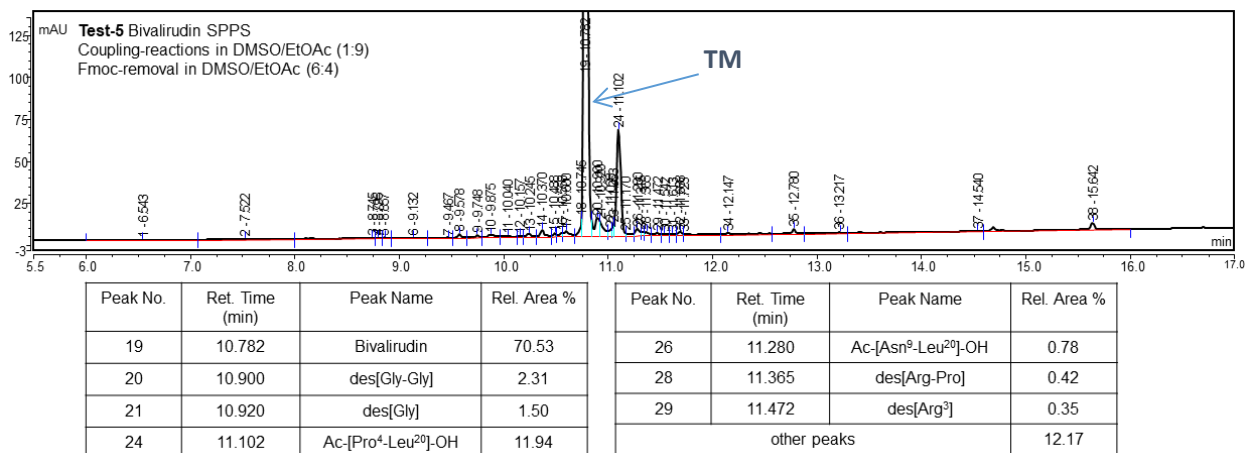

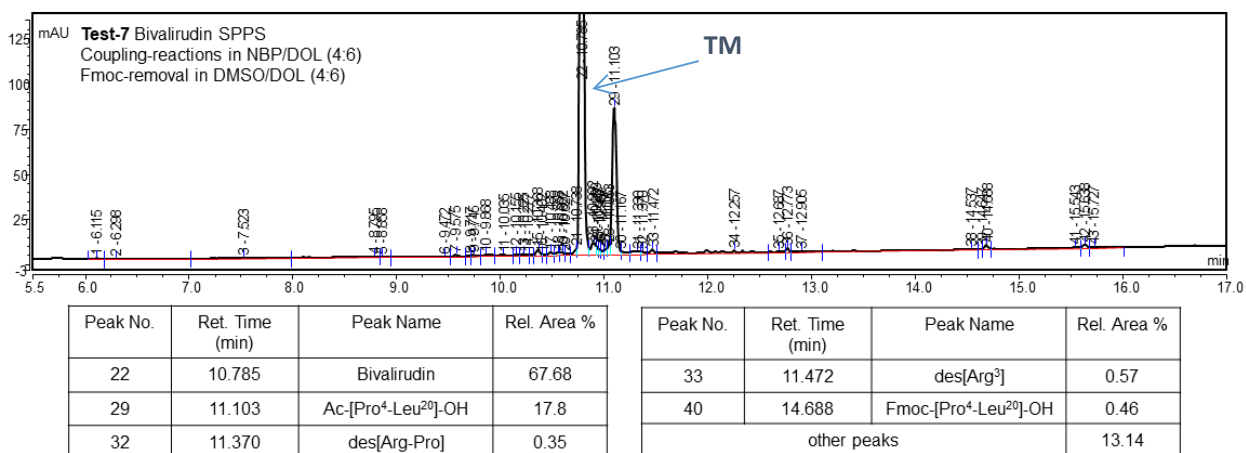

**Supplementary Figure S14.** Chromatogram depicting the impurity profile of Bivalirudin SPPS (entry 7) with coupling reactions in NBP/DOL (4:6) and Fmoc-removal in DMSO/DOL (4:6). The relative percentage of selected peaks are tabulated.

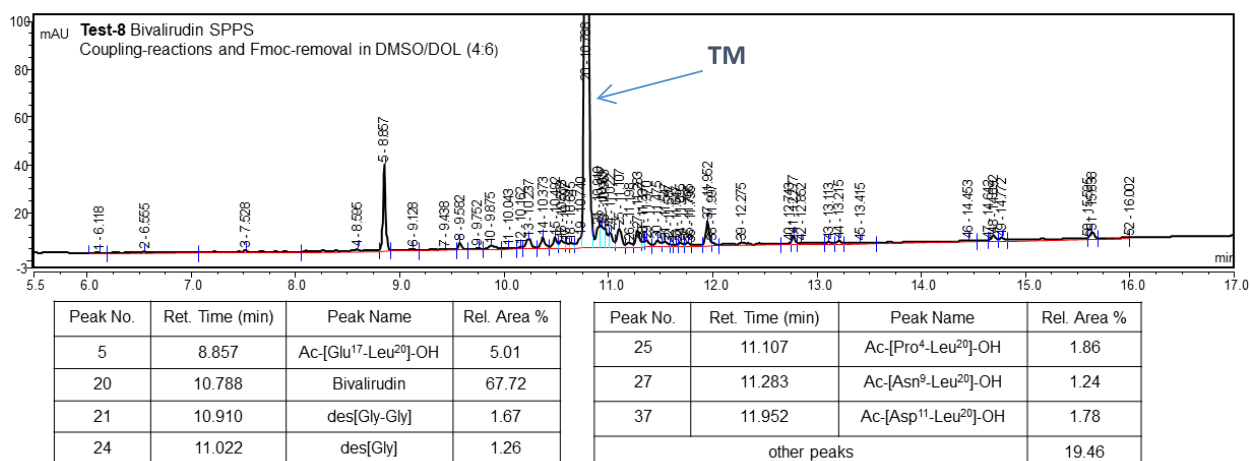

**Supplementary Figure S15.** Chromatogram depicting the impurity profile of Bivalirudin SPPS (entry 8) with coupling reactions and Fmoc-removal in DMSO/DOL (4:6). The relative percentage of selected peaks are tabulated.

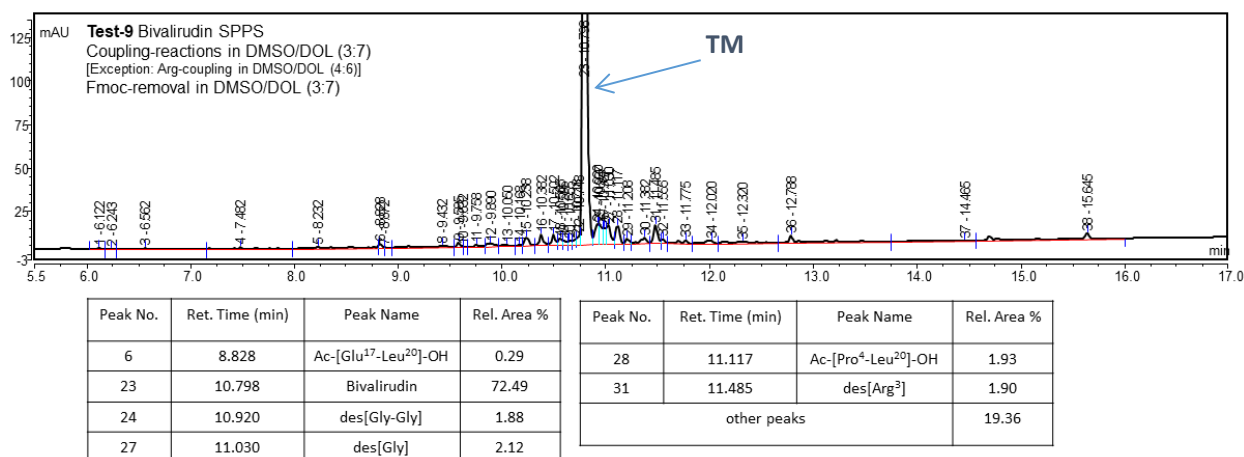

**Supplementary Figure S16.** Chromatogram depicting the impurity profile of Bivalirudin SPPS (Figure 6) with coupling reactions and Fmoc-removal in DMSO/DOL (3:7), except for the coupling of Fmoc-Arg(Pbf)-OH that was performed in DMSO/DOL (4:6). The relative percentage of selected peaks are tabulated.

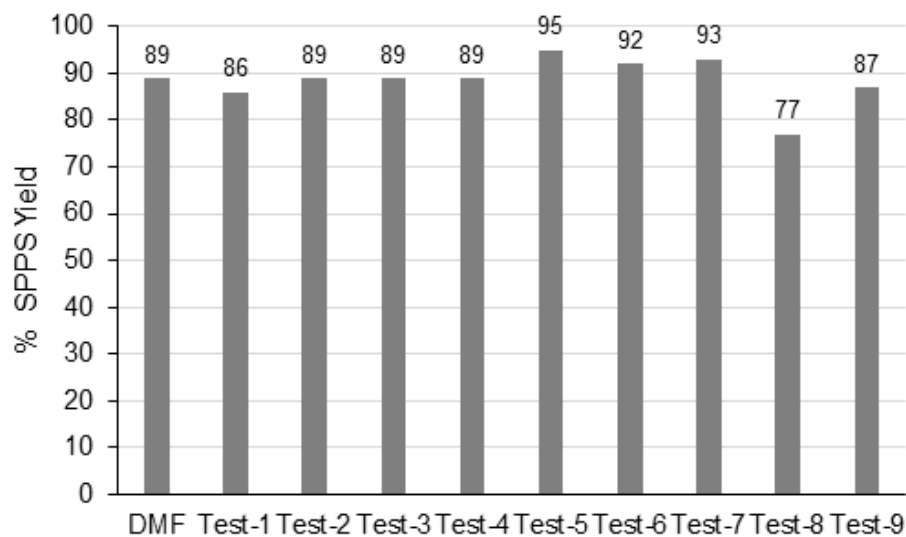

**Supplementary Figure S17.** The crude yield (%) of Bivalirudin SPPS based on corresponding resin weight gain (%) for synthesis entries 1-8 (Test-1-8), and the synthesis in DMSO/DOL (3:7) with the coupling of Fmoc-Arg(Pbf)-OH in DMSO/DOL (4:6) (Test-9).

## 4.2 Arg-lactamisation

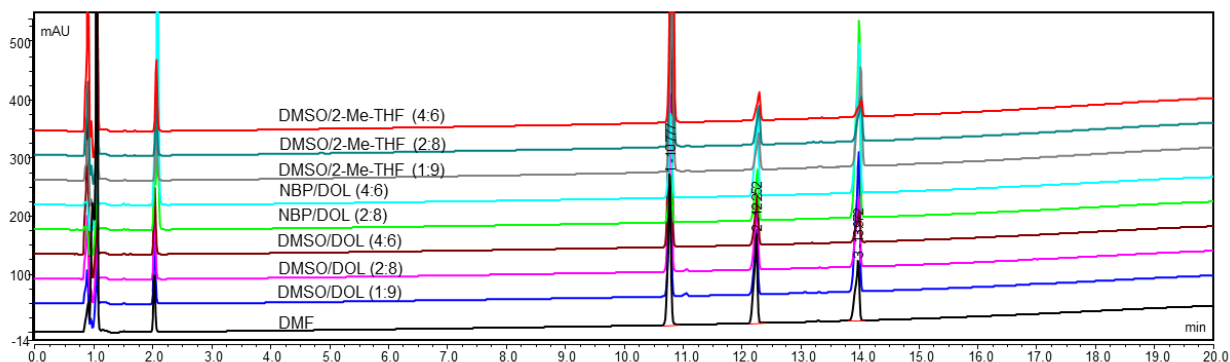

| Solvent        | Rel. Area %                                                  |                                                                |                                                                             |
|----------------|--------------------------------------------------------------|----------------------------------------------------------------|-----------------------------------------------------------------------------|
|                | Peak No.1<br>Ret. Time =<br>10.7 min<br>Fmoc-Arg(Pbf)-<br>OH | Peak No. 2<br>Ret. Time = 12.2<br>min<br>Fmoc-Arg(Pbf)-<br>OMe | Peak No. 3<br>Ret. Time = 13.9<br>min<br>Fmoc-Arg(Pbf)-<br>$\delta$ -lactam |
| DMF            | 45.24                                                        | 30.86                                                          | 23.89                                                                       |
| DMSO/DOL (1:9) | 28.01                                                        | 20.49                                                          | 51.50                                                                       |
| DMSO/DOL (2:8) | 50.78                                                        | 22.18                                                          | 27.04                                                                       |
| DMSO/DOL (4:6) | 75.10                                                        | 14.74                                                          | 10.16                                                                       |
| NBP/DOL (2:8)  | 12.34                                                        | 15.62                                                          | 72.04                                                                       |

| Solvent             | Rel. Area %                                                  |                                                                |                                                                             |
|---------------------|--------------------------------------------------------------|----------------------------------------------------------------|-----------------------------------------------------------------------------|
|                     | Peak No.1<br>Ret. Time =<br>10.7 min<br>Fmoc-<br>Arg(Pbf)-OH | Peak No. 2<br>Ret. Time =<br>12.2 min<br>Fmoc-<br>Arg(Pbf)-OMe | Peak No. 3<br>Ret. Time = 13.9<br>min<br>Fmoc-Arg(Pbf)-<br>$\delta$ -lactam |
| NBP/DOL (4:6)       | 21.85                                                        | 26.18                                                          | 51.98                                                                       |
| DMSO/2-Me-THF (1:9) | 52.43                                                        | 11.44                                                          | 36.13                                                                       |
| DMSO/2-Me-THF (2:8) | 73.06                                                        | 11.69                                                          | 15.25                                                                       |
| DMSO/2-Me-THF (4:6) | 86.73                                                        | 7.85                                                           | 5.42                                                                        |

**Supplementary Figure S18.** Chromatograms depicting the Arg-lactamisation in various binary solvent mixtures and DMF. The relative percentage of unreacted Fmoc-Arg(Pbf)-OH, methyl ester (Fmoc-Arg(Pbf)-OMe) and  $\delta$ -lactam is tabulated.

### 4.3 Aspartimide formation (with OMpe aspartyl protection)

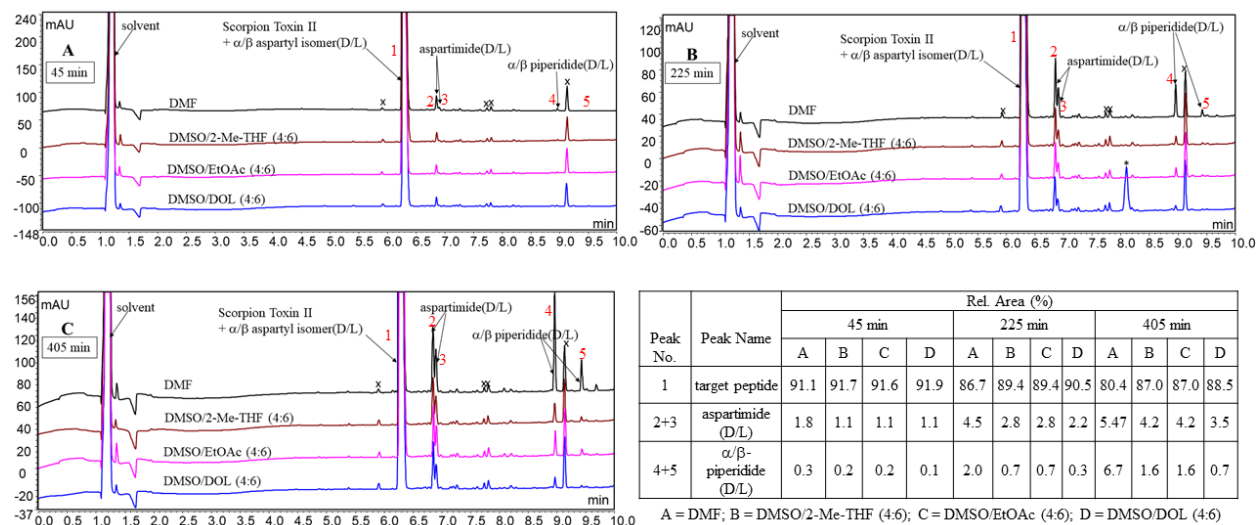

**Supplementary Figure S19.** Chromatograms depicting the aspartimide formation after A) 45 min, B) 225 min and C) 405 min of piperidine treatment (20%, v/v) in Scorpion Toxin II (with OMpe aspartyl protection) in binary solvent mixtures with similar polarity to DMF. The relative percentage of target peptide and aspartimide/piperidide is tabulated. The peaks marked with "X" are irrelevant to aspartimide/piperidide formation and originate from the reference peptide (peptide not treated with piperidine). The peak marked with "\*" in DMSO/DOL (4:6) in B is induced during sample preparation for HPLC analysis and is irrelevant to aspartimide/piperidide formation.

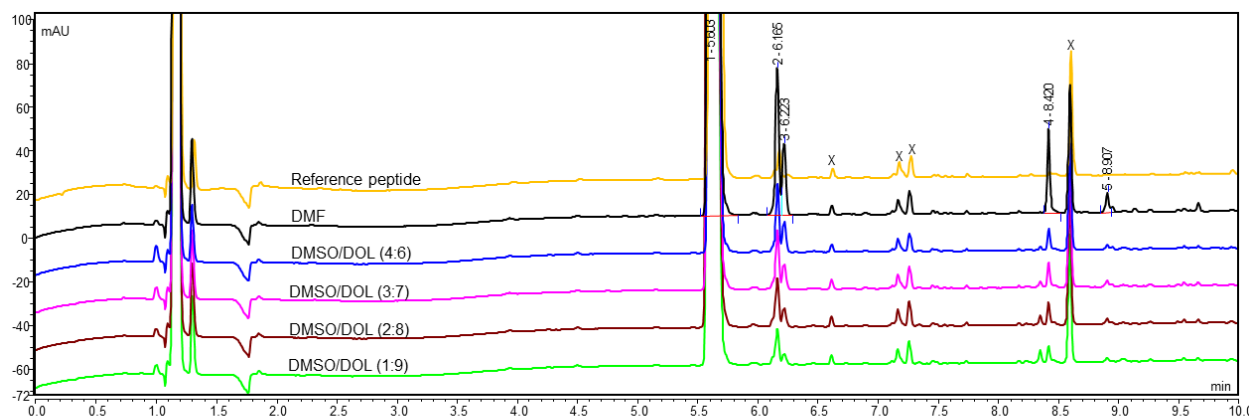

| Peak No. | Ret. Time (min) | Peak Name                                                      | Rel. Area (%)                                           |       |                |                |                |                |
|----------|-----------------|----------------------------------------------------------------|---------------------------------------------------------|-------|----------------|----------------|----------------|----------------|
|          |                 |                                                                | Scorpion Toxin II - prior to base treatment (Reference) | DMF   | DMSO/DOL (4:6) | DMSO/DOL (3:7) | DMSO/DOL (2:8) | DMSO/DOL (1:9) |
| 1        | 5.6             | Target peptide + $\alpha/\beta$ -aspartyl isomer (D/L), if any | 99.08                                                   | 93.14 | 96.53          | 97.21          | 97.90          | 98.27          |
| 2        | 6.1             | aspartimide (D/L)                                              | 0.72                                                    | 3.30  | 1.94           | 1.48           | 1.12           | 0.95           |
| 3        | 6.2             |                                                                | 0.10                                                    | 1.56  | 0.82           | 0.60           | 0.42           | 0.28           |
| 4        | 8.4             | $\alpha/\beta$ -piperidide (D/L)                               | 0.07                                                    | 1.61  | 0.57           | 0.56           | 0.46           | 0.40           |
| 5        | 8.9             |                                                                | 0.02                                                    | 0.39  | 0.13           | 0.14           | 0.11           | 0.11           |

**Supplementary Figure S20.** Polarity scan depicting increasing aspartimide formation with increasing polarity of DMSO/DOL after 225 min of piperidine treatment (20%, v/v). DMF shows higher aspartimide/piperidide formation than all tested combinations of DMSO/DOL. The relative percentage of target peptide and aspartimide/piperidide is tabulated. The peaks marked with “X” are irrelevant to aspartimide/piperidide formation and are originated from reference peptide (peptide not treated with piperidine).

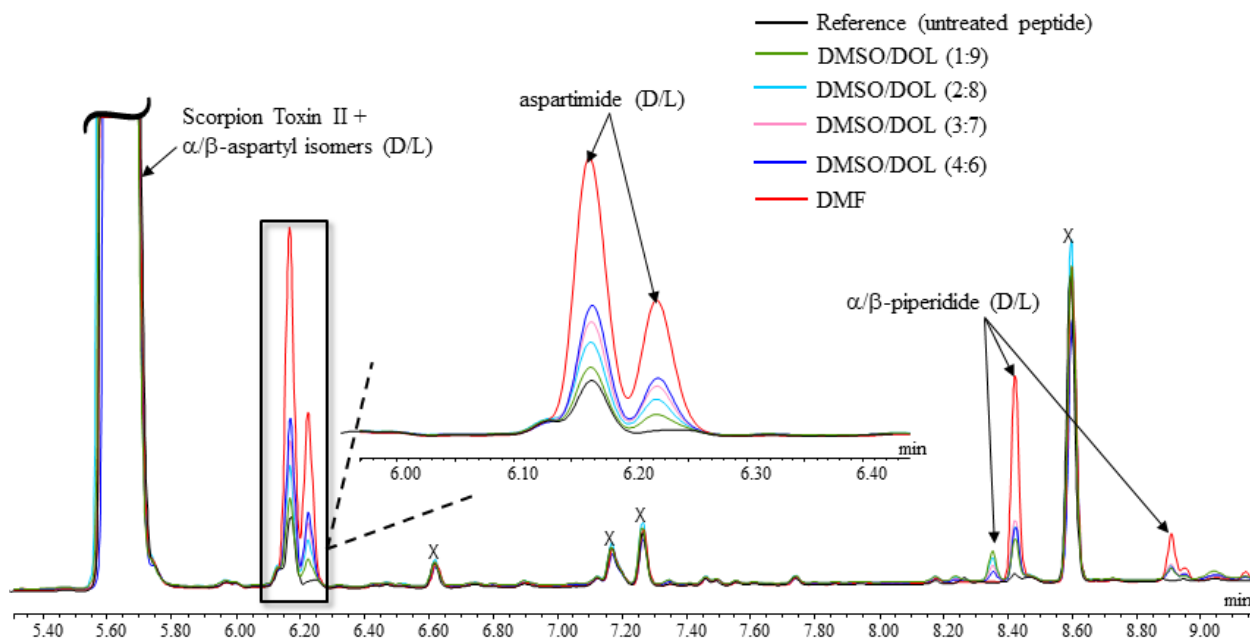

**Supplementary Figure S21.** Polarity scan depicting increasing aspartimide formation with increasing polarity of DMSO/DOL (polarity order 1:9 < 2:8 < 3:7 < 4:6) after 225 min of piperidine treatment (20%, v/v). In comparison, DMF shows higher aspartimide/piperidide formation than all other tested combinations of DMSO/DOL. The peaks marked with "X" are irrelevant to aspartimide/piperidide formation and originate from the reference peptide (peptide not treated with piperidine).

#### 4.4 Aspartimide formation without Oxyma Pure (with OtBu aspartyl protection)

Aspartimide formation without Oxyma Pure (with OtBu aspartyl protection) in DMF, repeated three times, method H

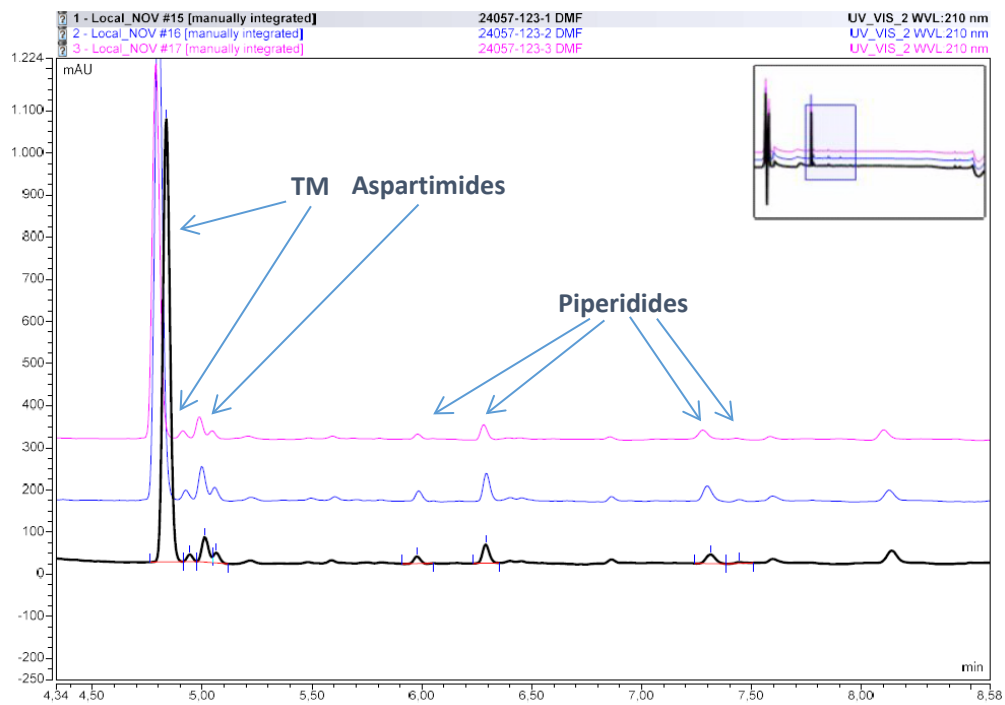



**Aspartimide formation without Oxyma Pure (with OtBu aspartyl protection) in DMSO/2-Me-THF (3:7), repeated three times, method H**

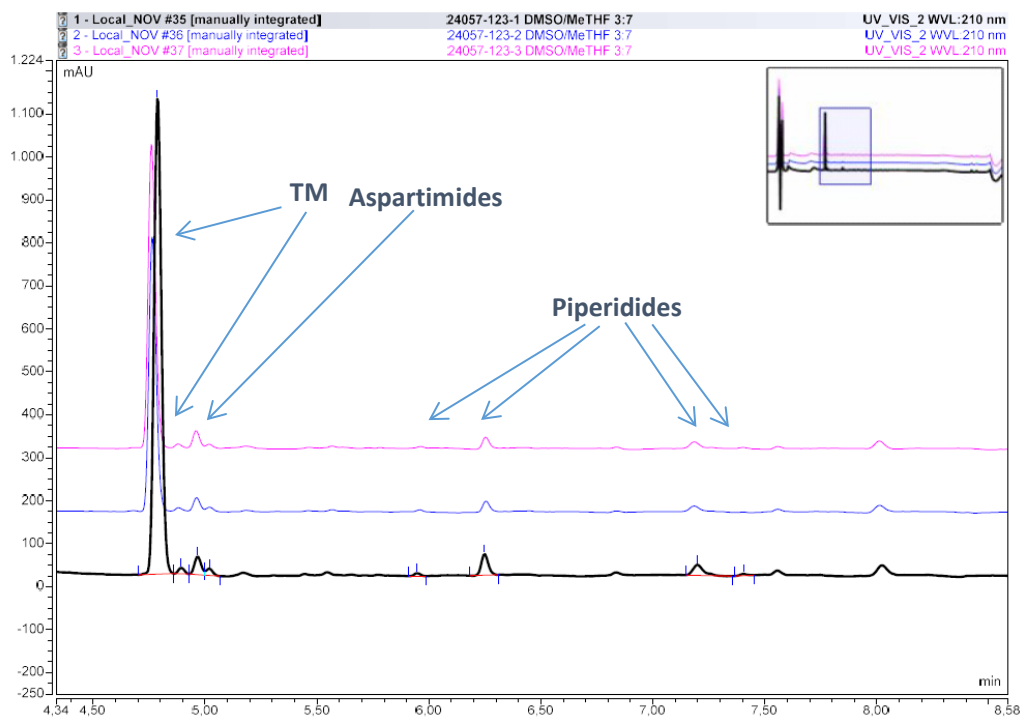

**Aspartimide formation without Oxyma Pure (with OtBu aspartyl protection) in DMSO/2-Me-THF (4:6), repeated three times, method H**

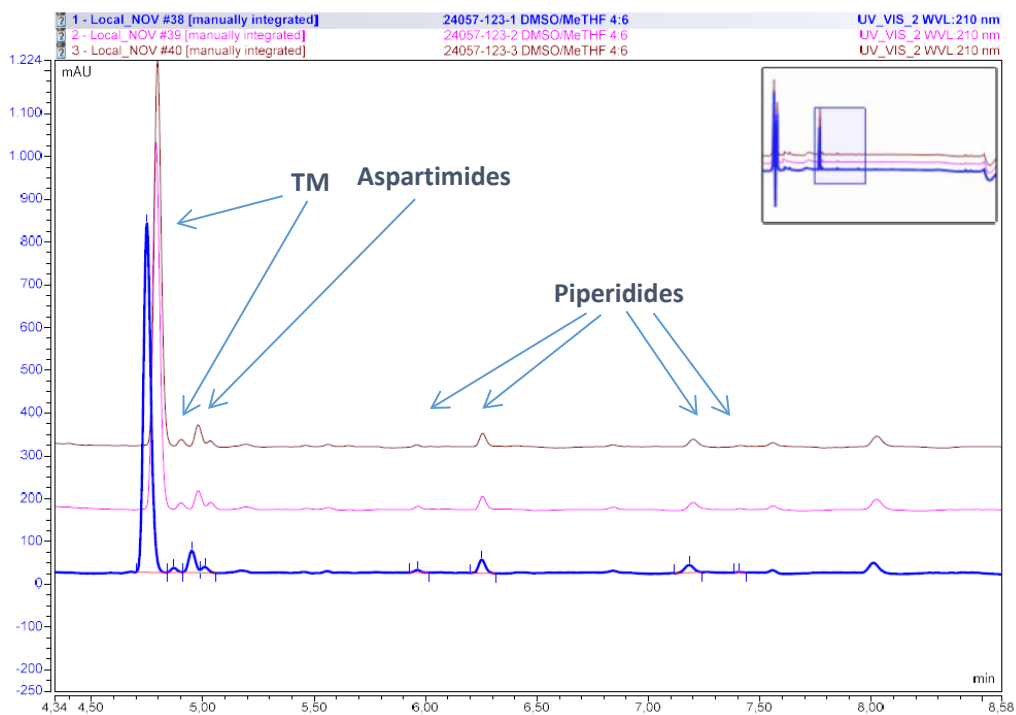

**Aspartimide formation without Oxyma Pure (with OtBu aspartyl protection) in DMSO/EtOAc (4:6), repeated three times, method H**

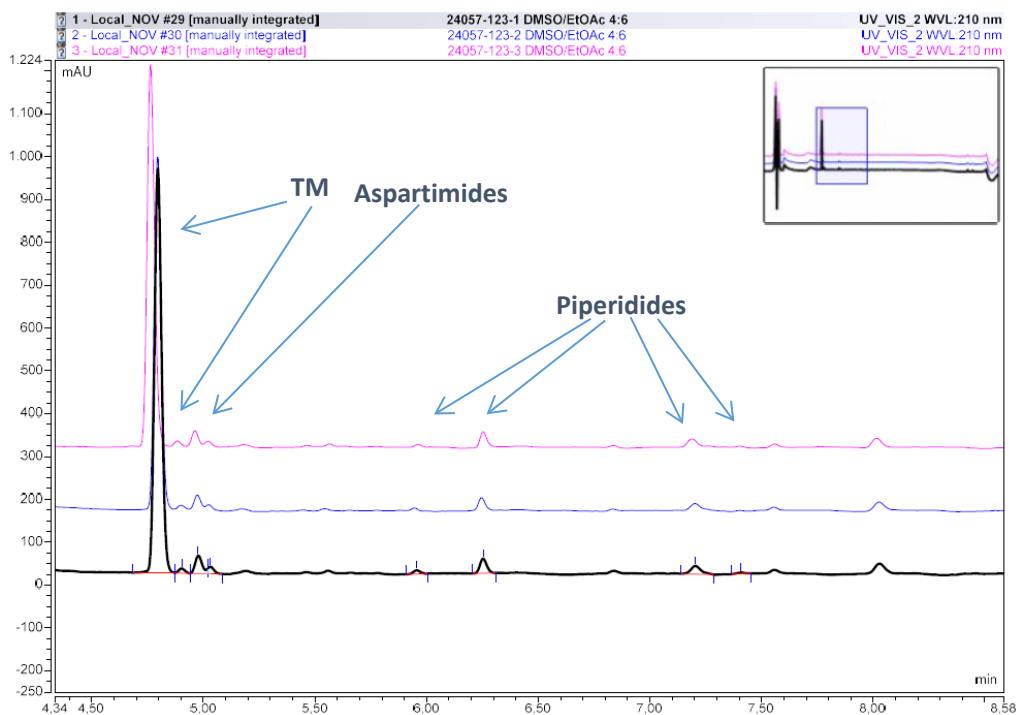

**Aspartimide formation without Oxyma Pure (with OtBu aspartyl protection) in DMSO/EtOAc (6:4), repeated three times, method H**

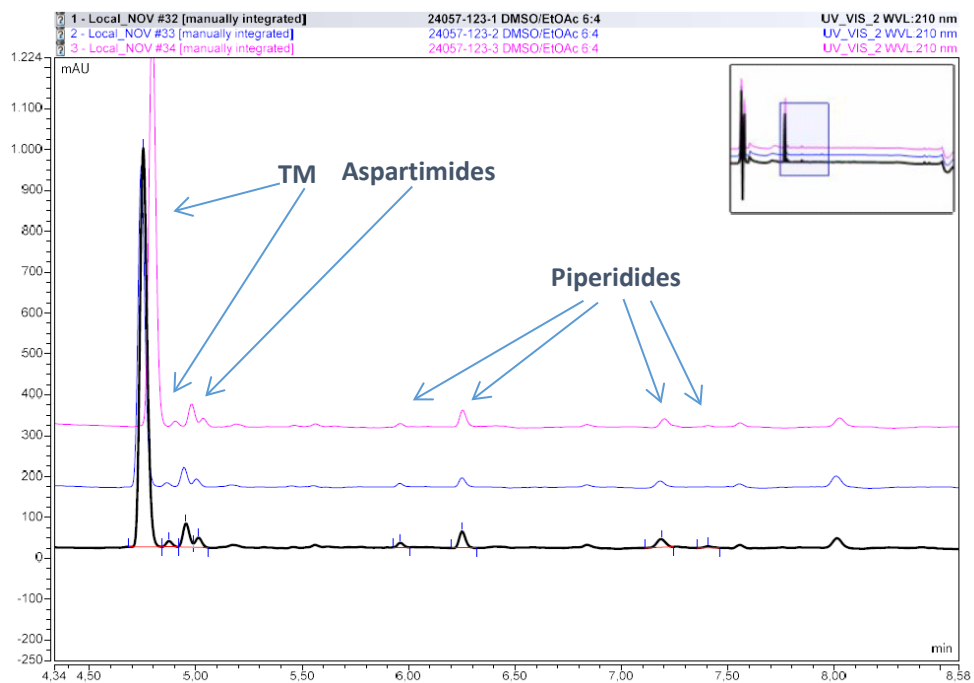

**Aspartimide formation without Oxyma Pure (with OtBu aspartyl protection) in DMSO/DOL (3:7), repeated three times, method H**

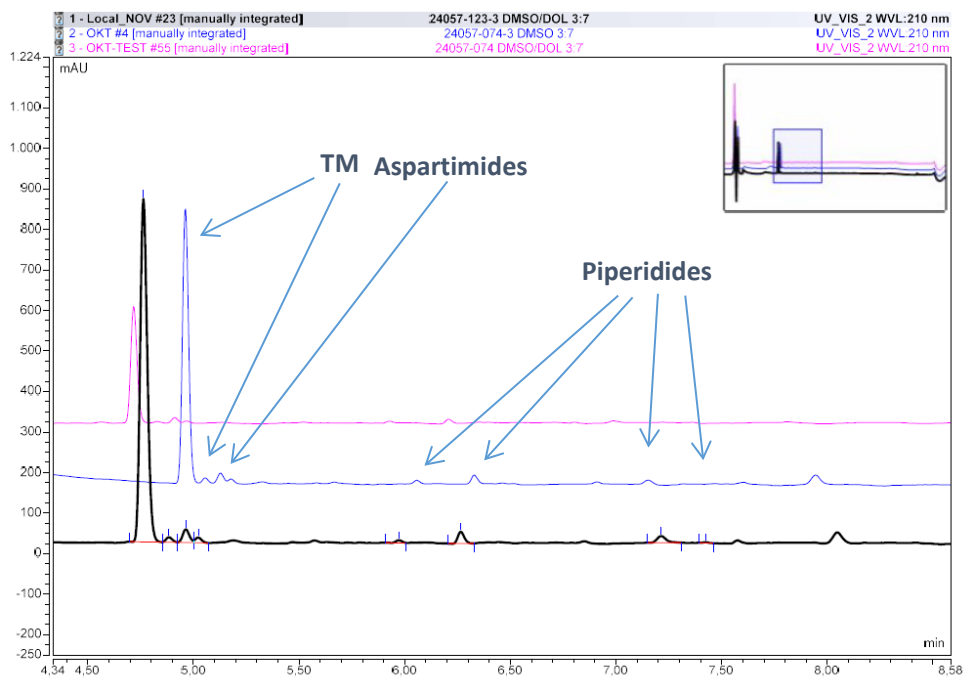

**Aspartimide formation without Oxyma Pure (with OtBu aspartyl protection) in DMSO/DOL (4:6), repeated three times, method H**

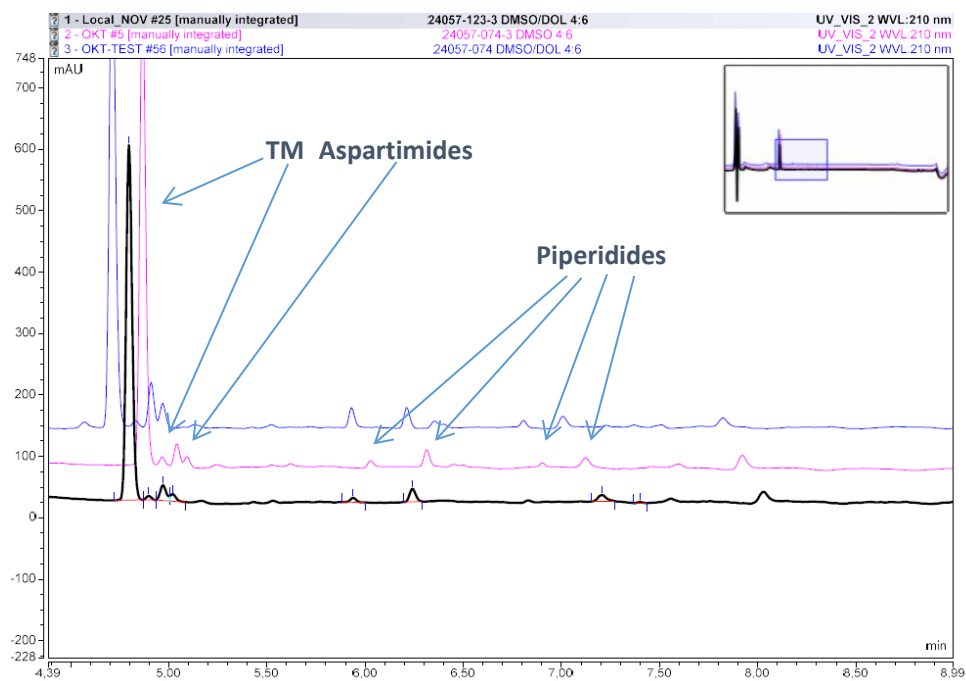

**Aspartimide formation without Oxyma Pure (with OtBu aspartyl protection) in NBP/DOL (4:6), repeated three times, method H**

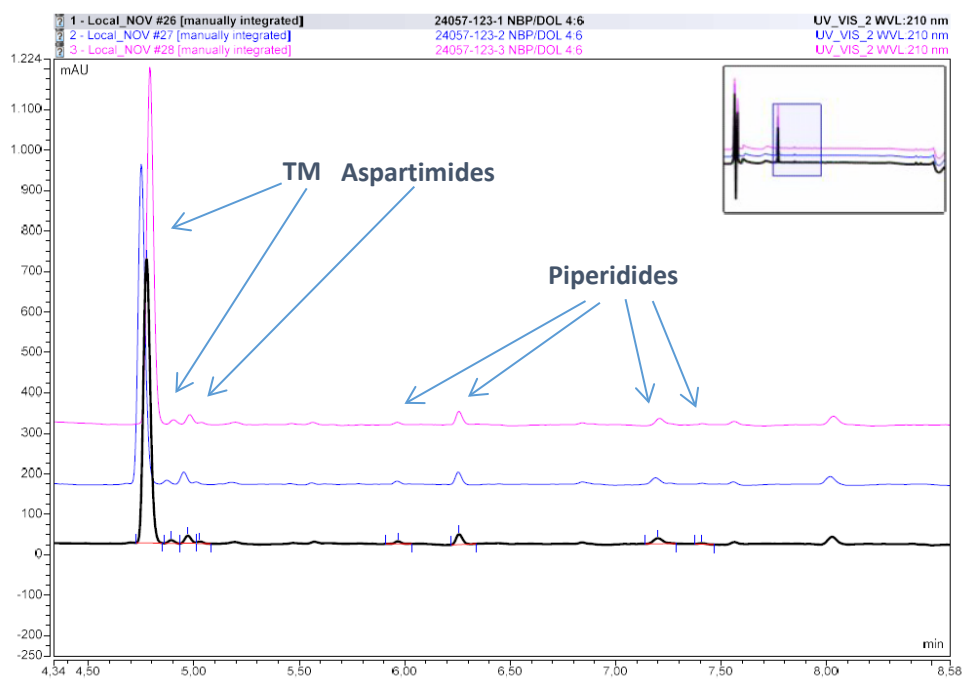

**Aspartimide formation without Oxyma Pure (with OtBu aspartyl protection) in NFM/DOL (2:8), repeated three times, method H**

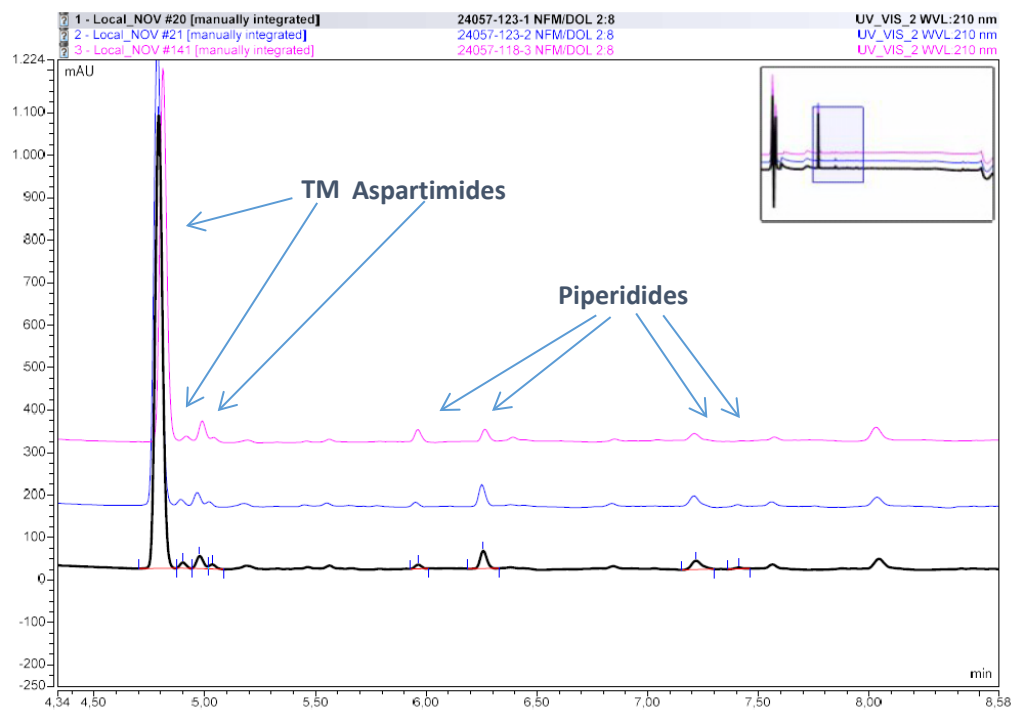



#### 4.5 Aspartimide formation with Oxyma Pure (with OtBu aspartyl protection)

#### Aspartimide formation without Oxyma Pure (with OtBu aspartyl protection) in DMF, method H

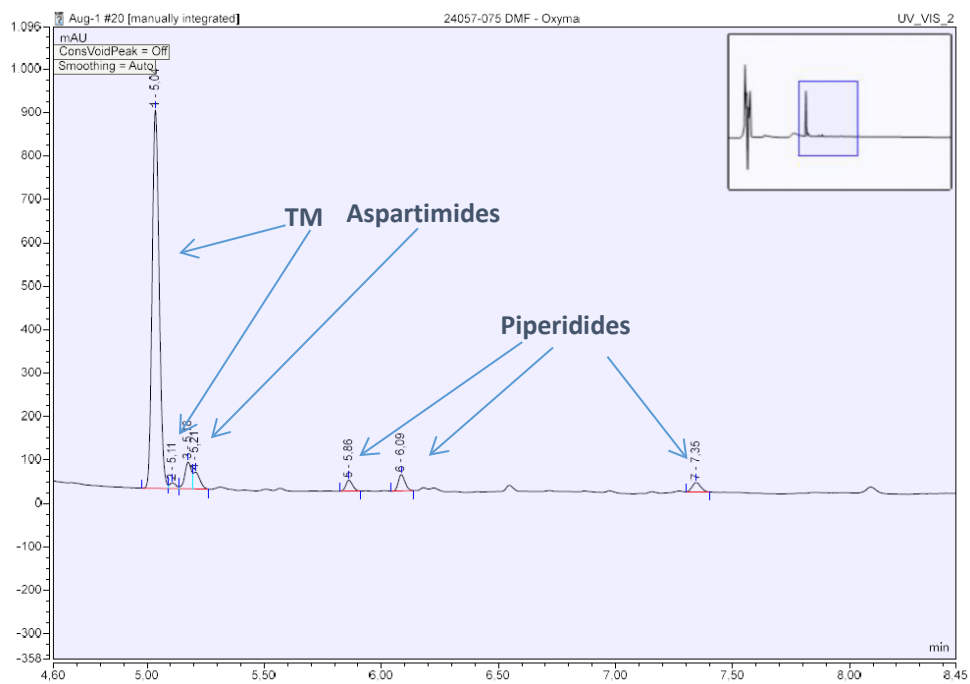

# Aspartimide formation without Oxyma Pure (with OtBu aspartyl protection) in DMSO/2-Me-THF (3:7), method H

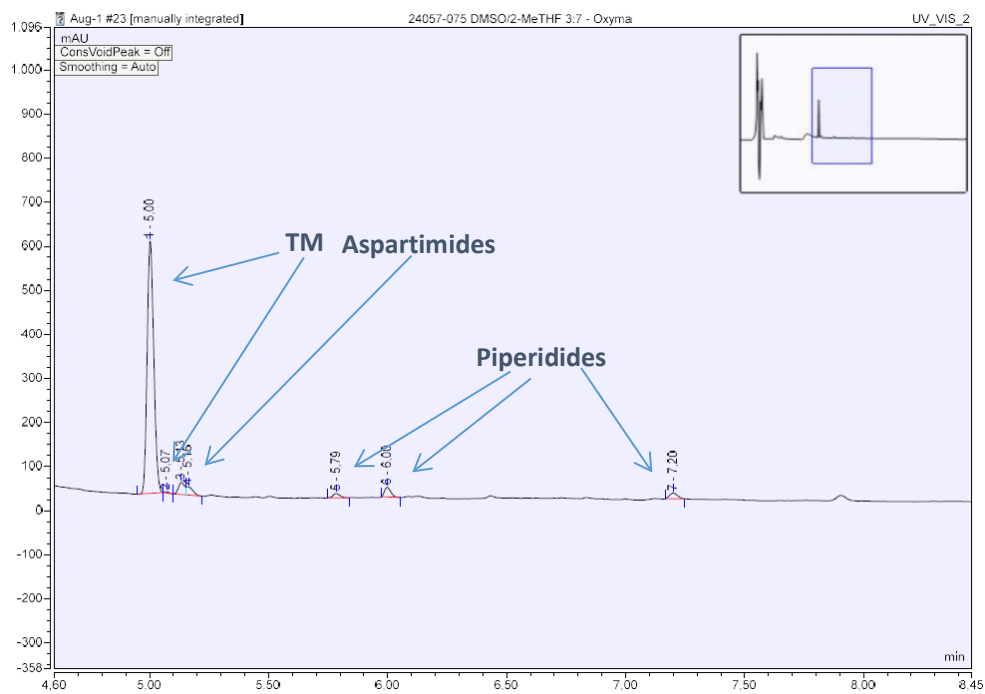

# Aspartimide formation without Oxyma Pure (with OtBu aspartyl protection) in DMSO/2-Me-THF (4:6), method H

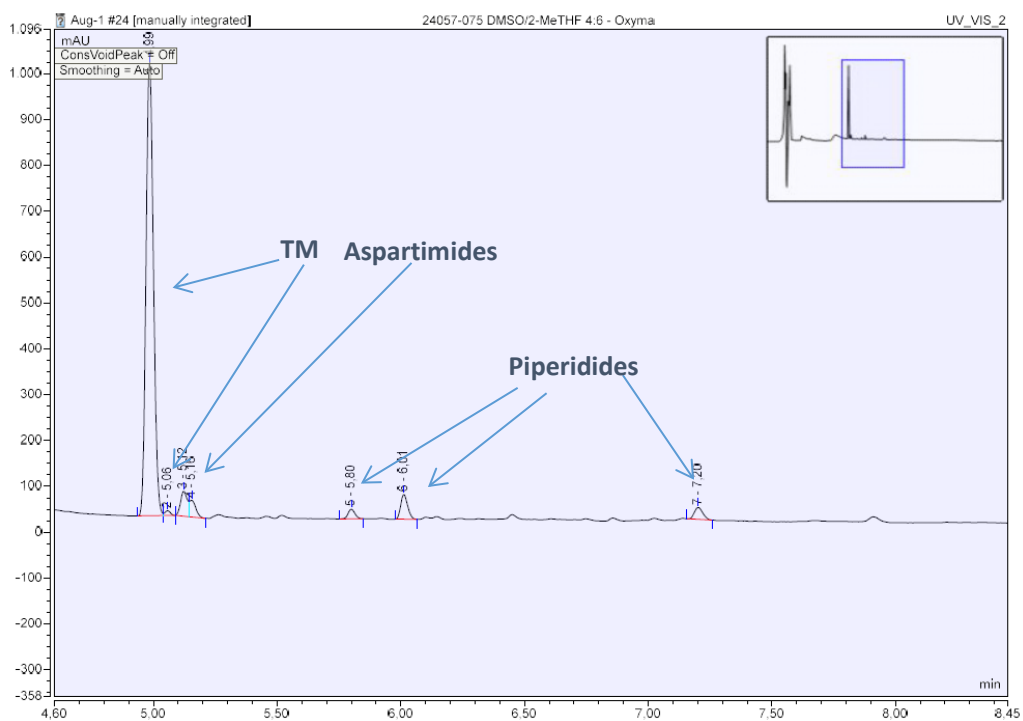

**Aspartimide formation without Oxyma Pure (with OtBu aspartyl protection) in DMSO/EtOAc (4:6), method H**

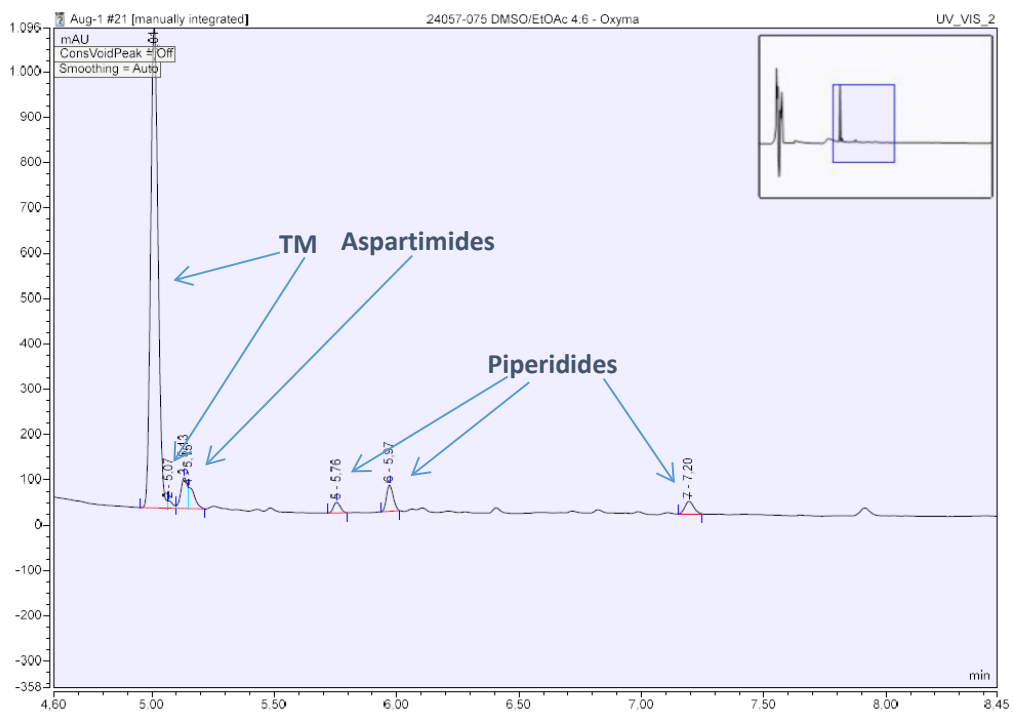

**Aspartimide formation without Oxyma Pure (with OtBu aspartyl protection) in DMSO/EtOAc (6:4), method H**

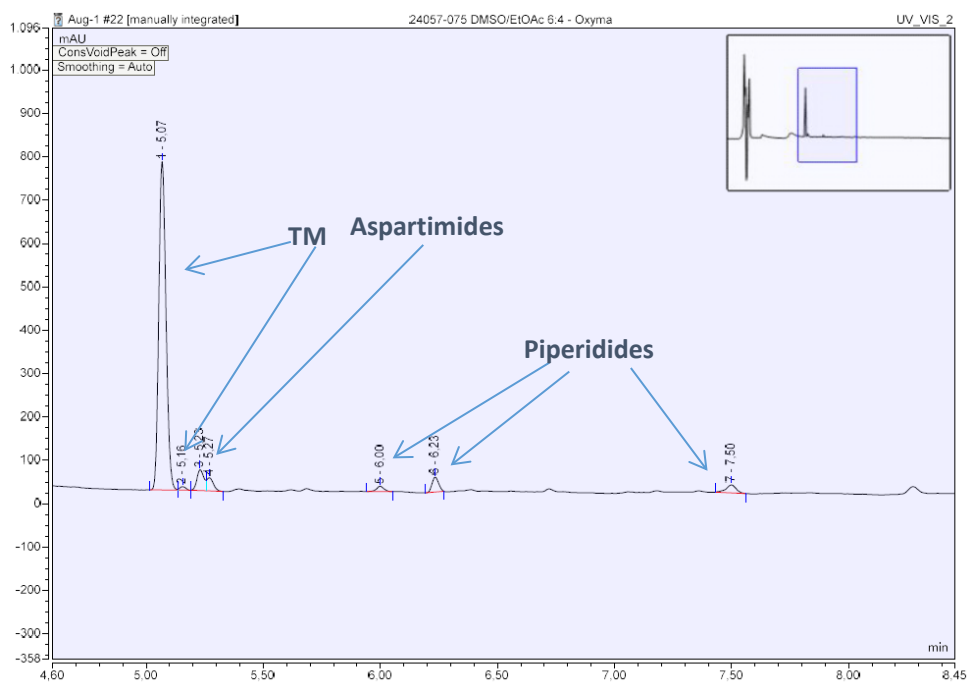

**Aspartimide formation without Oxyma Pure (with OtBu aspartyl protection) in DMSO/DOL (3:7), method H**

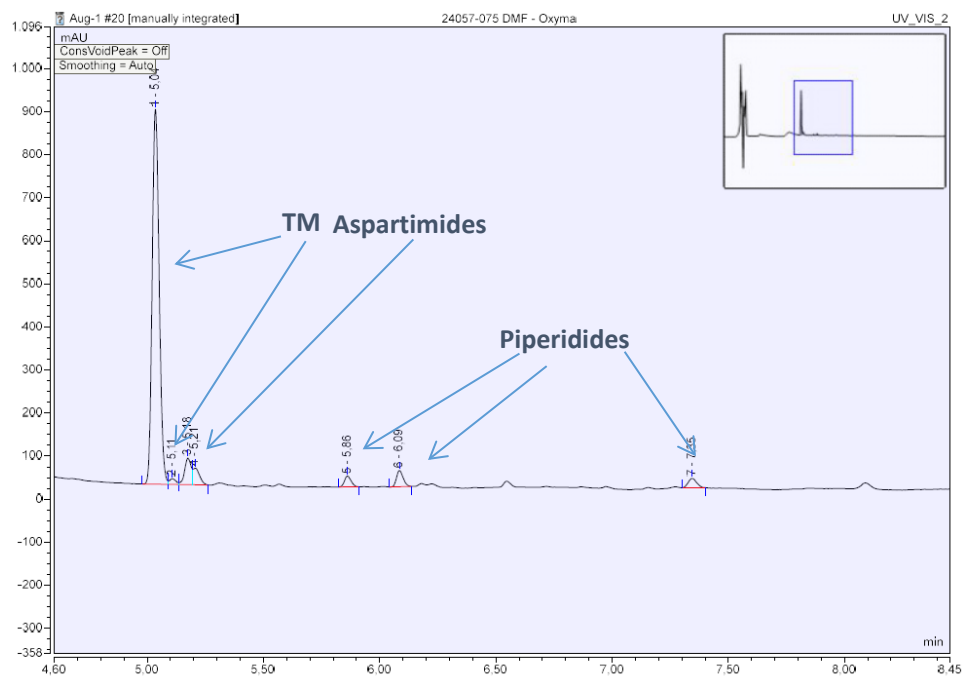

**Aspartimide formation without Oxyma Pure (with OtBu aspartyl protection) in DMSO/DOL (4:6), method H**

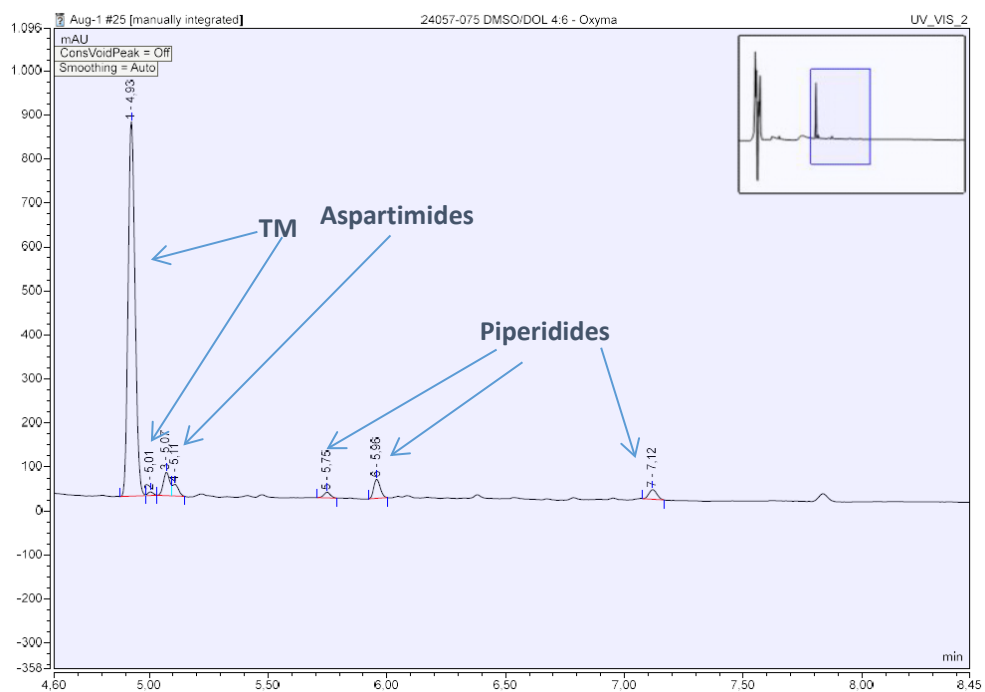

**Aspartimide formation without Oxyma Pure (with OtBu aspartyl protection) in NBP/DOL (4:6), method H**

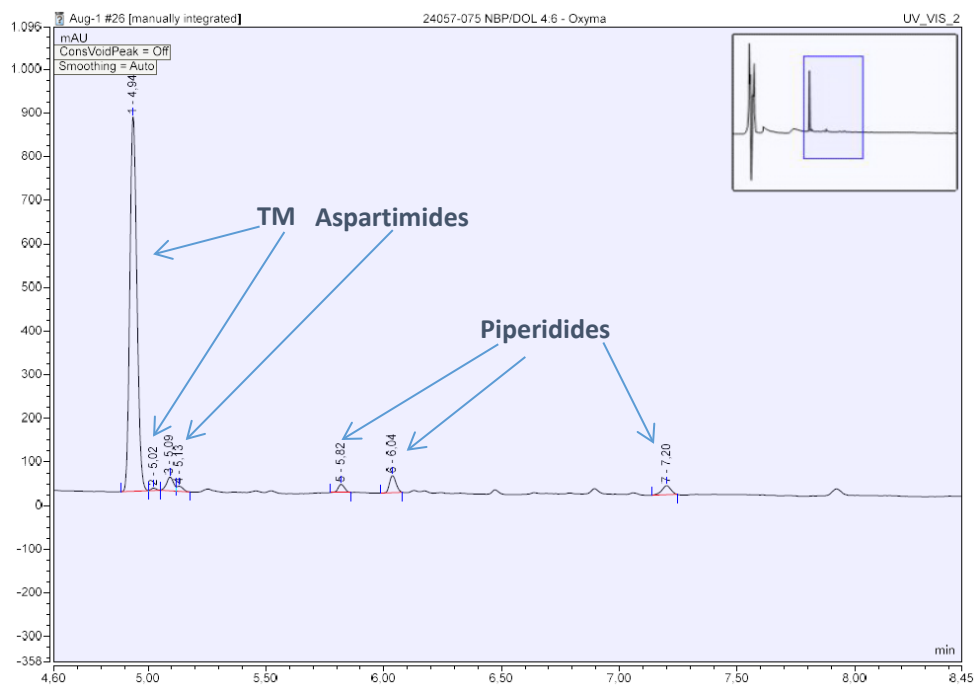



**Aspartimide formation without Oxyma Pure (with OtBu aspartyl protection) in NFM/DOL (2:8), method H**

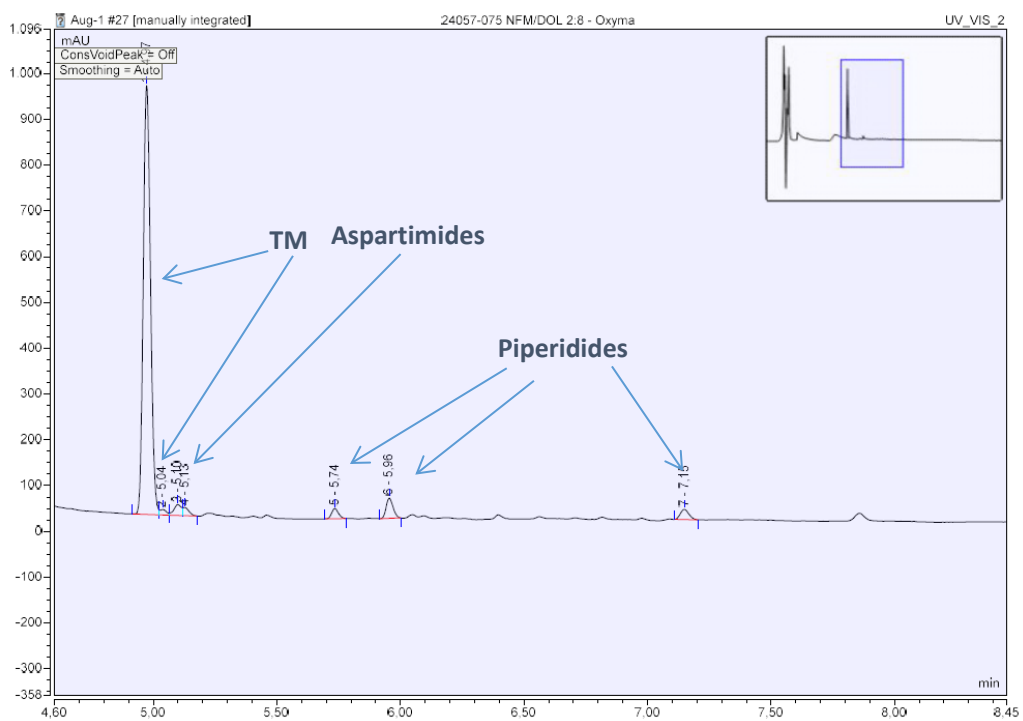

#### 4.6 Aspartimide formation with Oxyma Pure (with OtBu aspartyl protection) ( $\alpha$ - $\beta$ -isomerisation)

Aspartimide formation without Oxyma Pure ( $\alpha$ - $\beta$ -isomerisation) in DMF, without Oxyma, no spike, method H

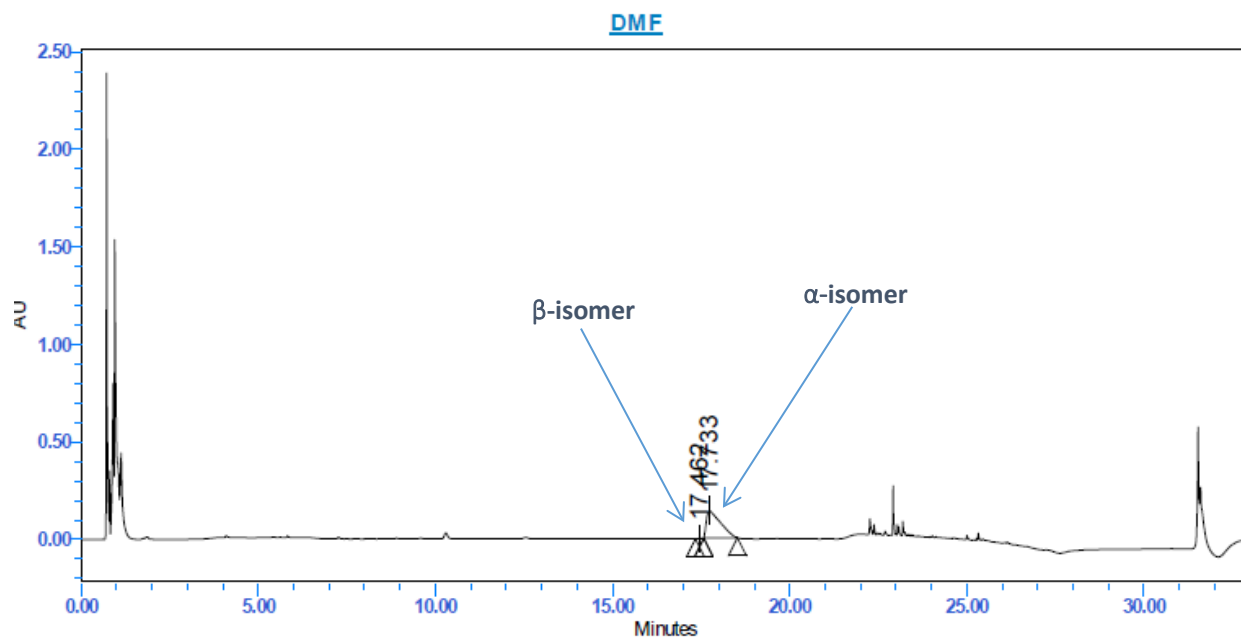

**Peak Results**

|   | Name | RT     | Area    | Height | Amount | % Area |
|---|------|--------|---------|--------|--------|--------|
| 1 |      | 17.462 | 12681   | 1915   |        | 0.33   |
| 2 |      | 17.733 | 3860004 | 140419 |        | 99.67  |

Aspartimide formation without Oxyma Pure ( $\alpha$ - $\beta$ -isomerisation) in DMF, without Oxyma, with spike, method H

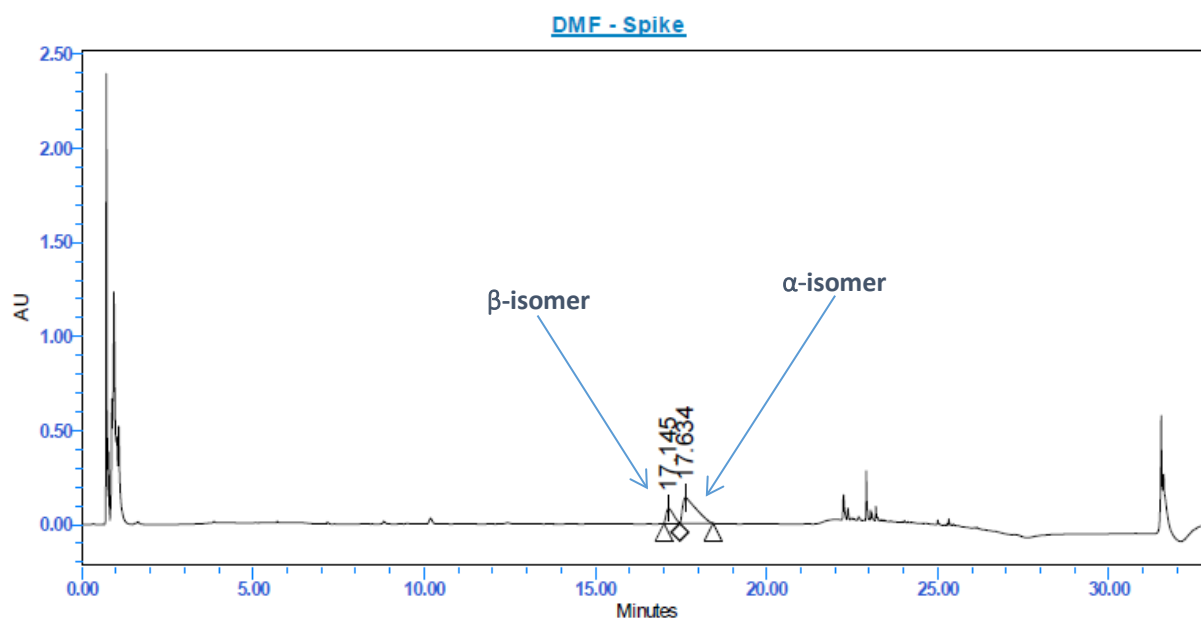

**Peak Results**

|   | Name | RT     | Area    | Height | Amount | % Area |
|---|------|--------|---------|--------|--------|--------|
| 1 |      | 17.145 | 1171612 | 79577  |        | 23.68  |
| 2 |      | 17.634 | 3776602 | 137295 |        | 76.32  |

Aspartimide formation without Oxyma Pure ( $\alpha$ - $\beta$ -isomerisation) in DMF, with Oxyma, no spike, method H

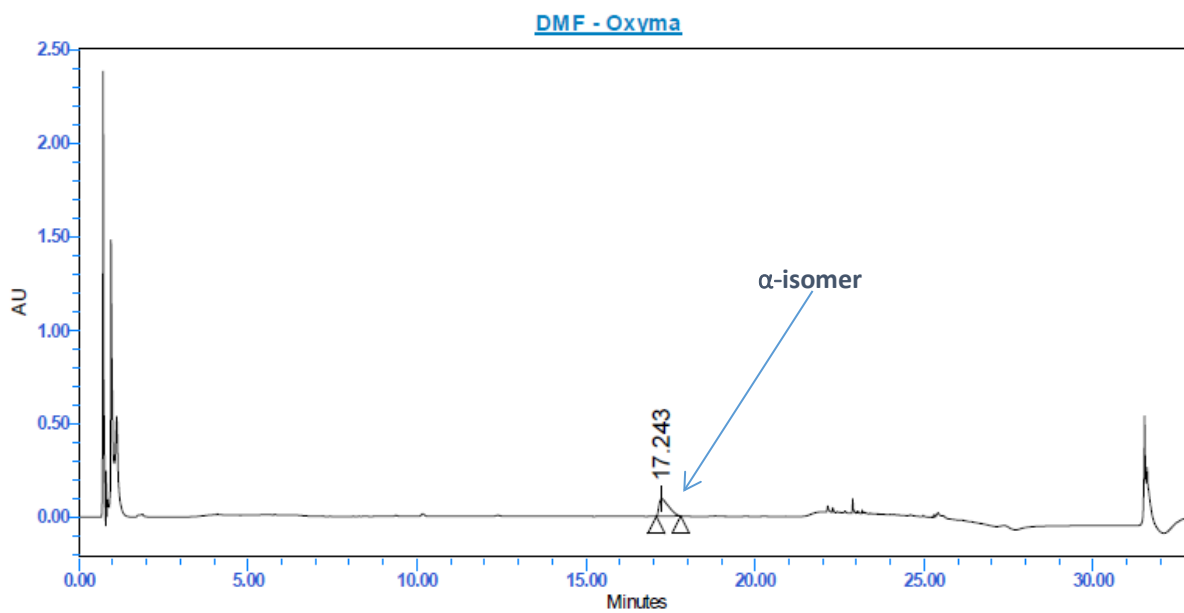

**Peak Results**

|   | Name | RT     | Area    | Height | Amount | % Area |
|---|------|--------|---------|--------|--------|--------|
| 1 |      | 17.243 | 1849837 | 93727  |        | 100.00 |

Aspartimide formation without Oxyma Pure ( $\alpha$ - $\beta$ -isomerisation) in DMF, with Oxyma, with spike, method H

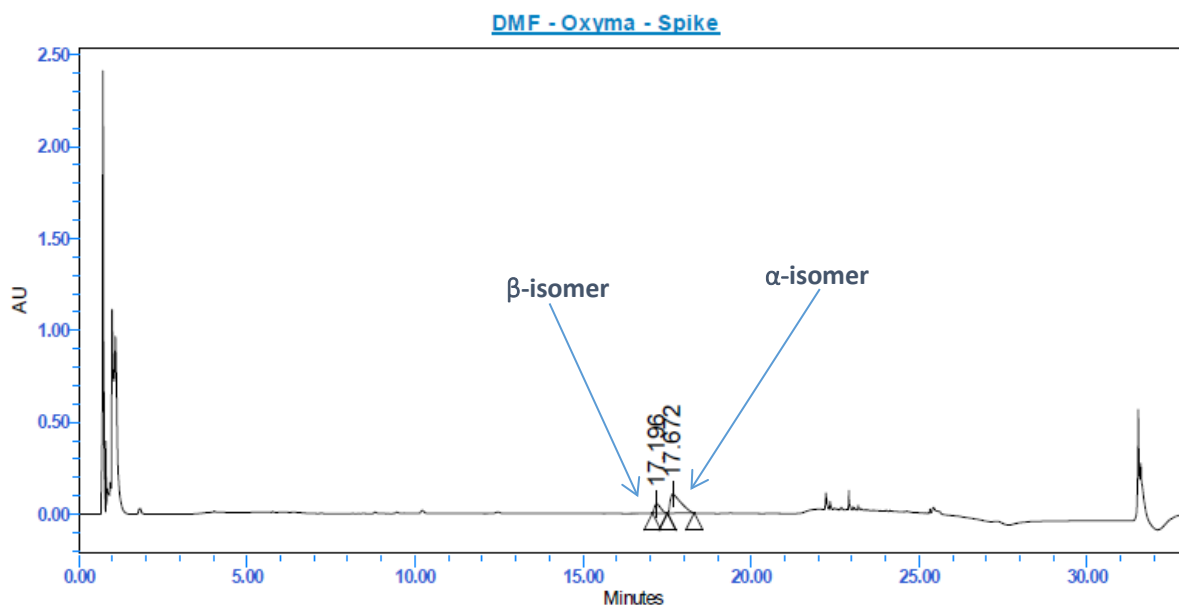

**Peak Results**

|   | Name | RT     | Area    | Height | Amount | % Area |
|---|------|--------|---------|--------|--------|--------|
| 1 |      | 17.196 | 638883  | 51100  |        | 21.82  |
| 2 |      | 17.672 | 2288924 | 104336 |        | 78.18  |

Aspartimide formation without Oxyma Pure ( $\alpha$ - $\beta$ -isomerisation) in DMSO/2-Me-THF (3:7), without Oxyma, no spike, method H

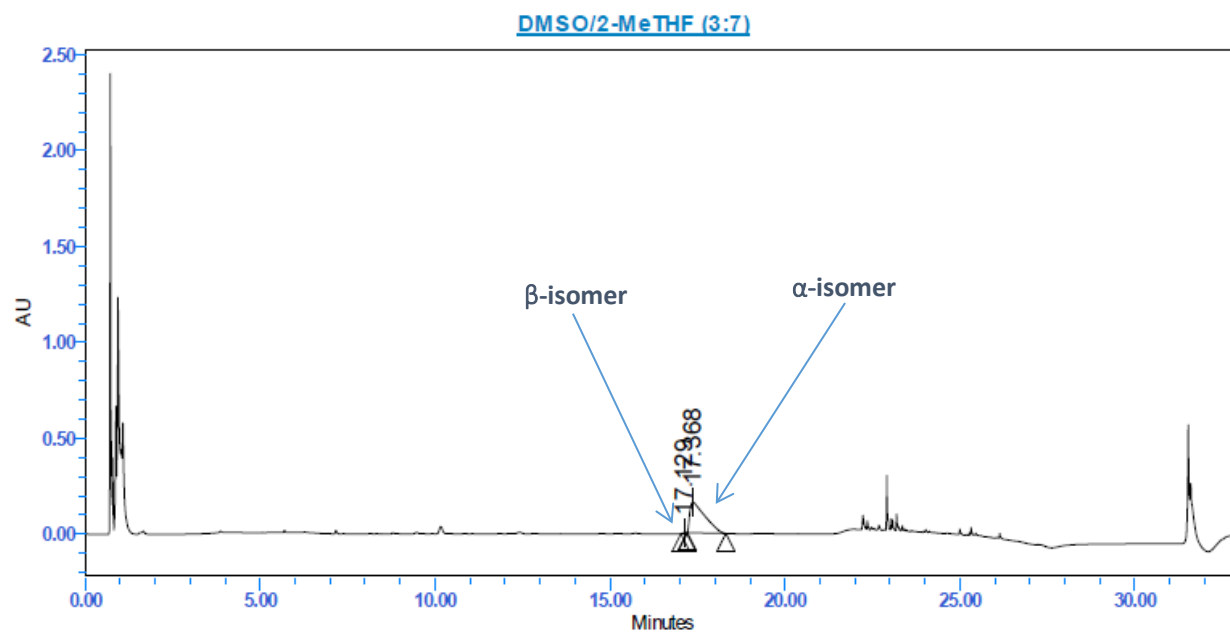

**Peak Results**

| Name | RT     | Area    | Height | Amount | % Area |
|------|--------|---------|--------|--------|--------|
| 1    | 17.129 | 16766   | 3091   |        | 0.35   |
| 2    | 17.368 | 4797040 | 161187 |        | 99.65  |

Aspartimide formation without Oxyma Pure ( $\alpha$ - $\beta$ -isomerisation) in DMSO/2-Me-THF (3:7), without Oxyma, with spike, method H

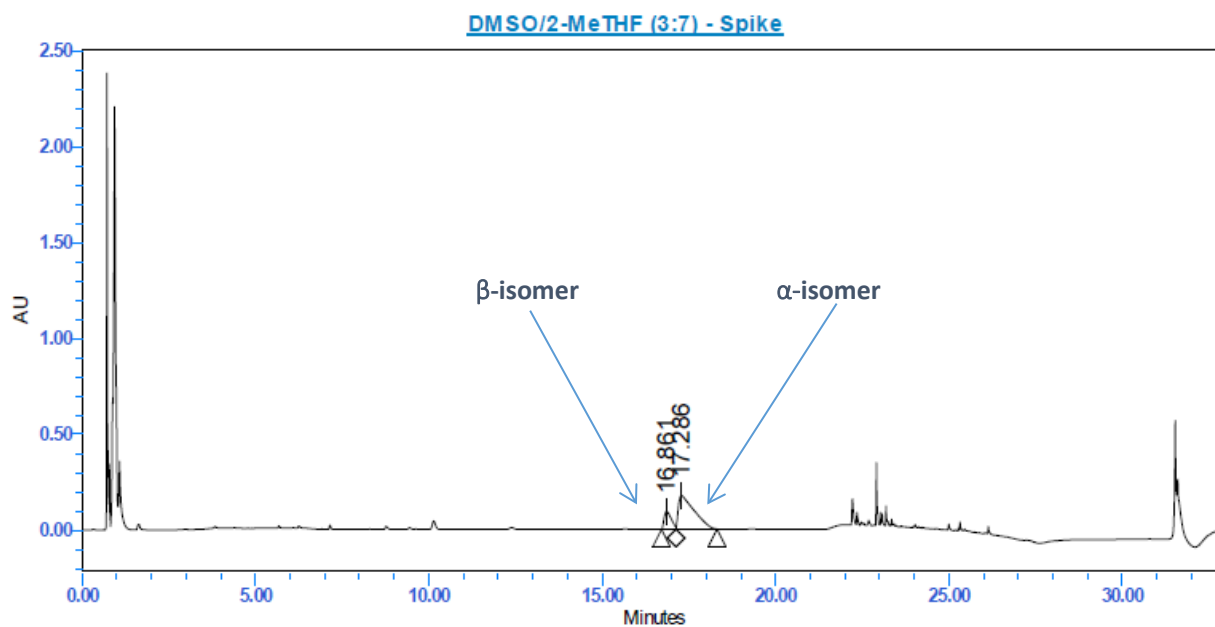

**Peak Results**

| Name | RT     | Area    | Height | Amount | % Area |
|------|--------|---------|--------|--------|--------|
| 1    | 16.861 | 1324238 | 92797  |        | 19.18  |
| 2    | 17.286 | 5580584 | 175853 |        | 80.82  |

Aspartimide formation without Oxyma Pure ( $\alpha$ - $\beta$ -isomerisation) in DMSO/2-MeTHF (3:7), with Oxyma, no spike, method H

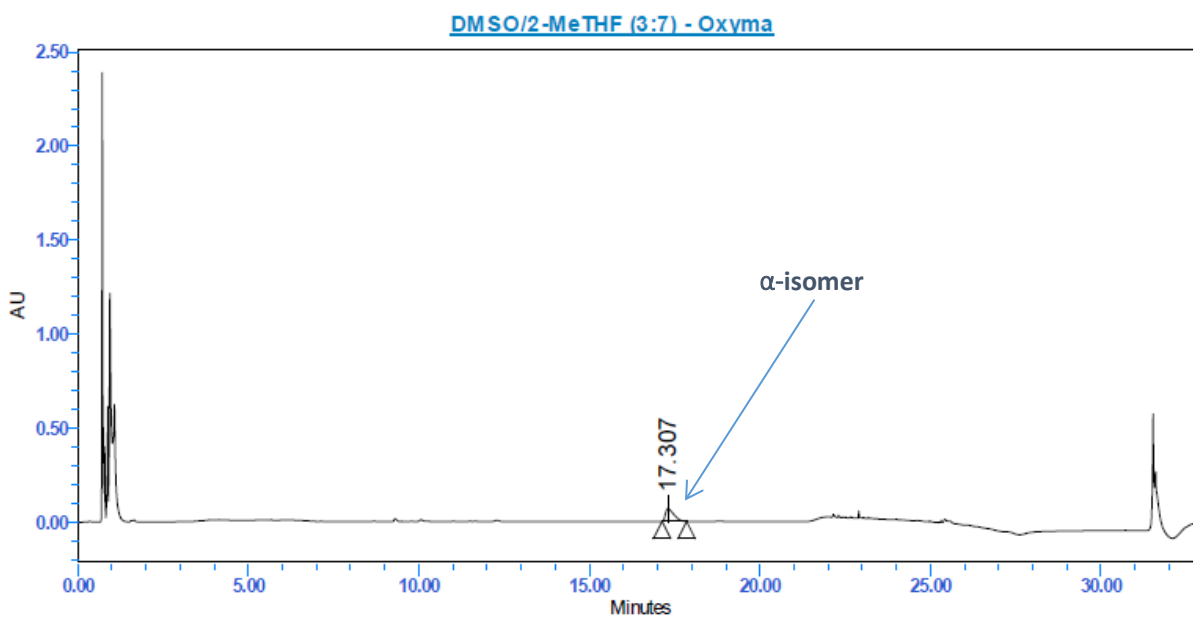

**Peak Results**

| Name | RT     | Area    | Height | Amount | % Area |
|------|--------|---------|--------|--------|--------|
| 1    | 17.307 | 1156568 | 67824  |        | 100.00 |



Aspartimide formation without Oxyma Pure ( $\alpha$ - $\beta$ -isomerisation) in DMSO/2-MeTHF (3:7), with Oxyma, with spike, method H

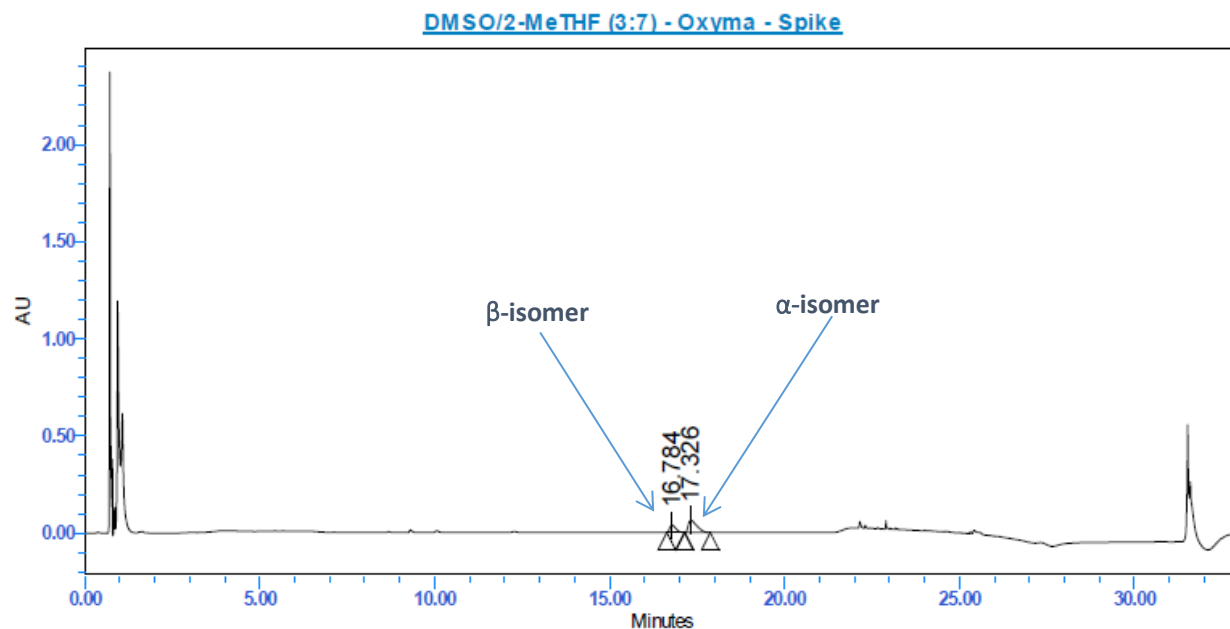

**Peak Results**

| Name | RT     | Area    | Height | Amount | % Area |
|------|--------|---------|--------|--------|--------|
| 1    | 16.784 | 449504  | 36881  |        | 30.04  |
| 2    | 17.326 | 1046856 | 62340  |        | 69.96  |

Aspartimide formation without Oxyma Pure ( $\alpha$ - $\beta$ -isomerisation) in DMSO/2-MeTHF (4:6), without Oxyma, no spike, method H

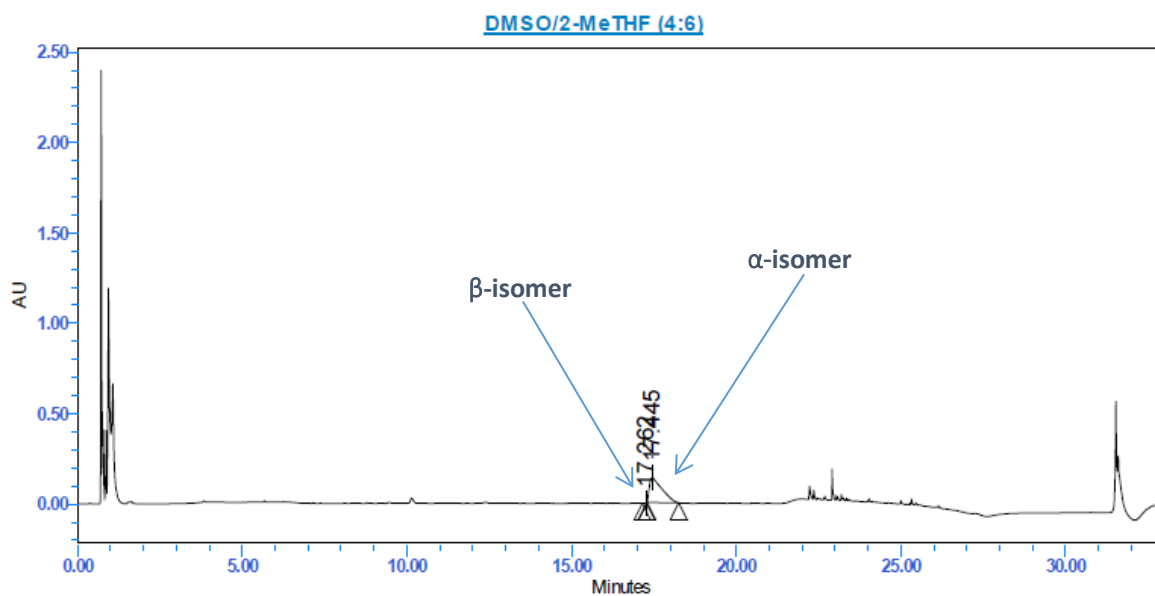

**Peak Results**

| Name | RT     | Area    | Height | Amount | % Area |
|------|--------|---------|--------|--------|--------|
| 1    | 17.262 | 512     | -192   |        | 0.01   |
| 2    | 17.445 | 3656734 | 137434 |        | 99.99  |

Aspartimide formation without Oxyma Pure ( $\alpha$ - $\beta$ -isomerisation) in DMSO/2-MeTHF (4:6), without Oxyma, with spike, method H

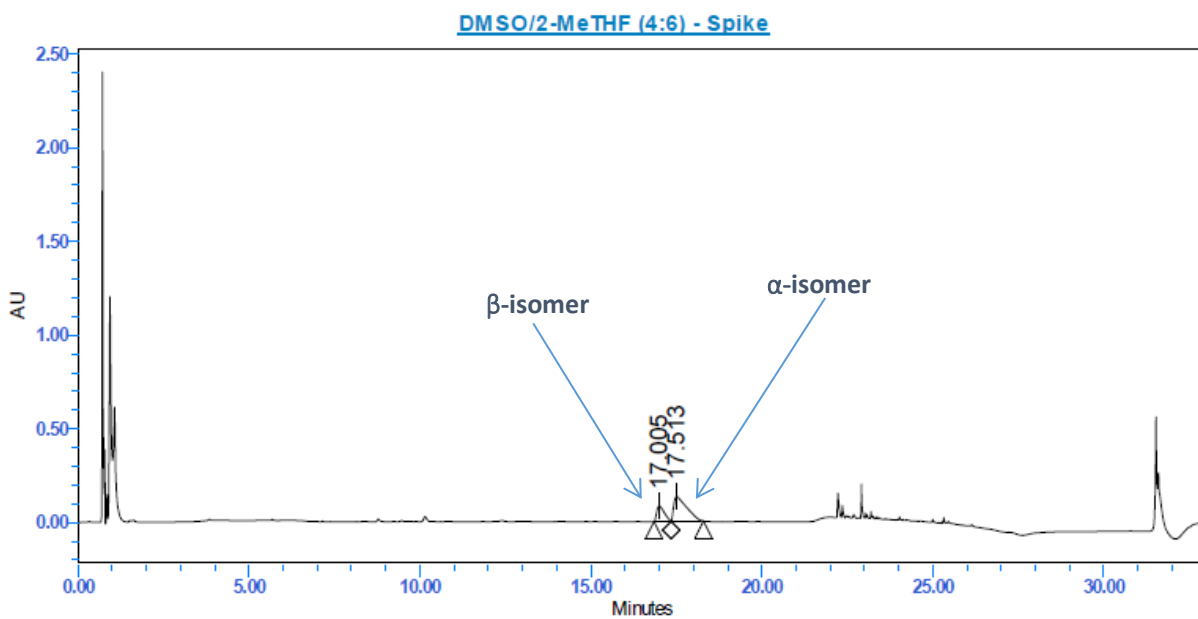

**Peak Results**

| Name | RT     | Area    | Height | Amount | % Area |
|------|--------|---------|--------|--------|--------|
| 1    | 17.005 | 1281707 | 83072  |        | 26.72  |
| 2    | 17.513 | 3515228 | 133117 |        | 73.28  |

Aspartimide formation without Oxyma Pure ( $\alpha$ - $\beta$ -isomerisation) in DMSO/2-MeTHF (4:6), with Oxyma, no spike, method H

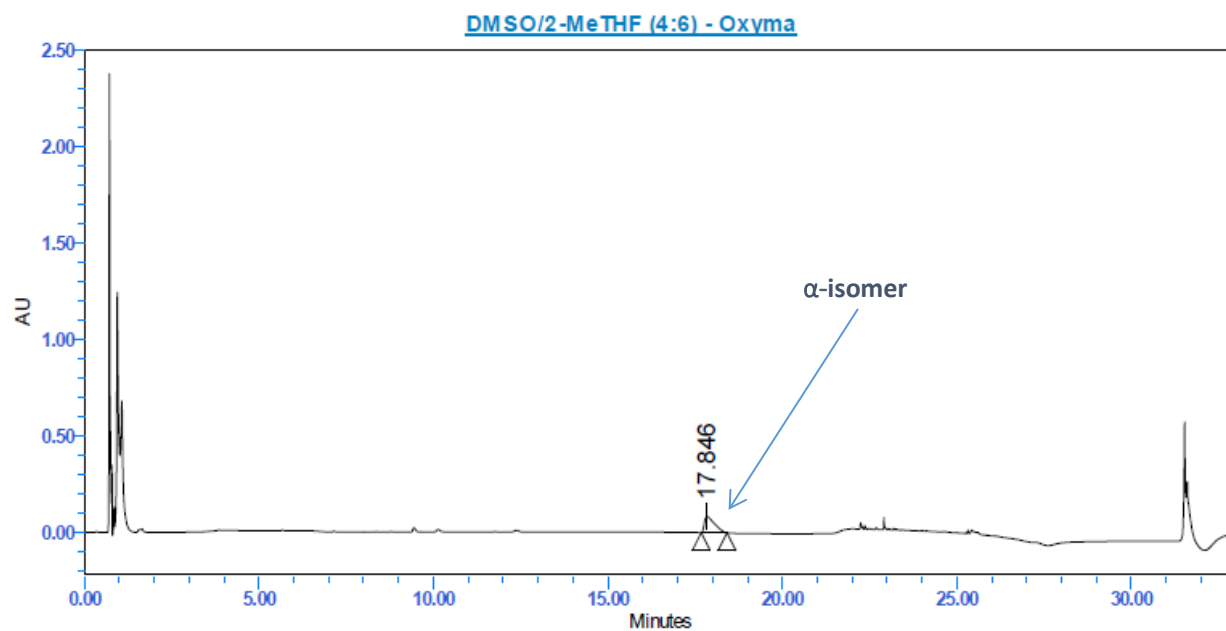

**Peak Results**

| Name | RT     | Area    | Height | Amount | % Area |
|------|--------|---------|--------|--------|--------|
| 1    | 17.846 | 1691766 | 83928  |        | 100.00 |

Aspartimide formation without Oxyma Pure ( $\alpha$ - $\beta$ -isomerisation) in DMSO/2-MeTHF (4:6), with Oxyma, with spike, method H

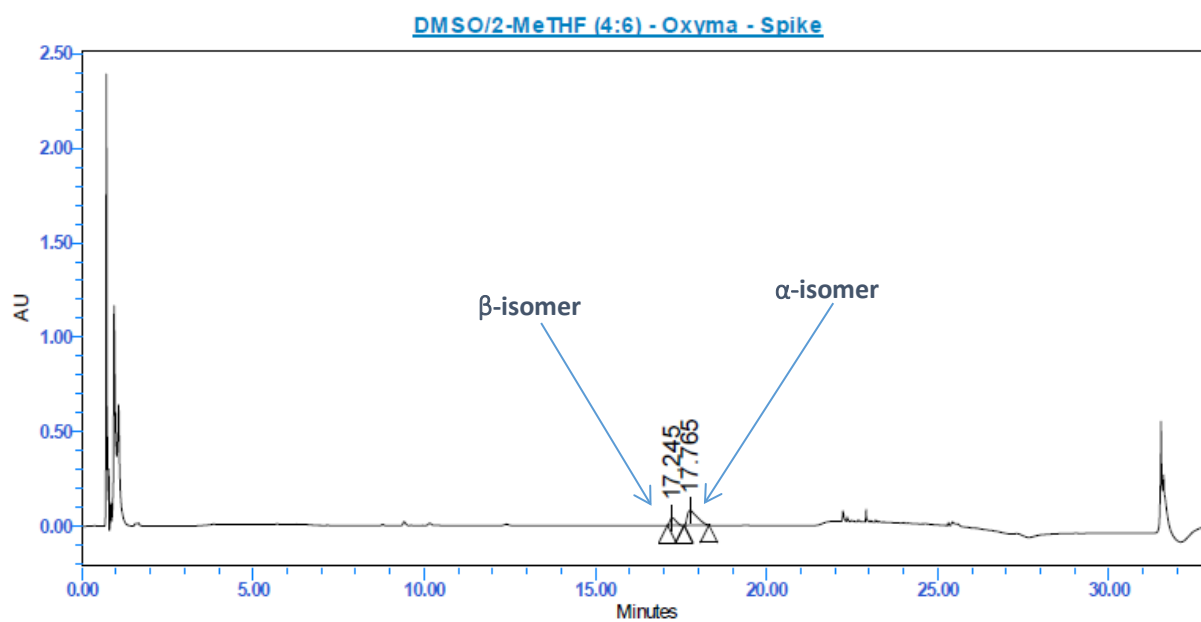

**Peak Results**

|   | Name | RT     | Area    | Height | Amount | % Area |
|---|------|--------|---------|--------|--------|--------|
| 1 |      | 17.245 | 487634  | 39365  |        | 23.79  |
| 2 |      | 17.765 | 1562346 | 79204  |        | 76.21  |

Aspartimide formation without Oxyma Pure ( $\alpha$ - $\beta$ -isomerisation) in DMSO/EtOAc (4:6), without Oxyma, no spike, method H

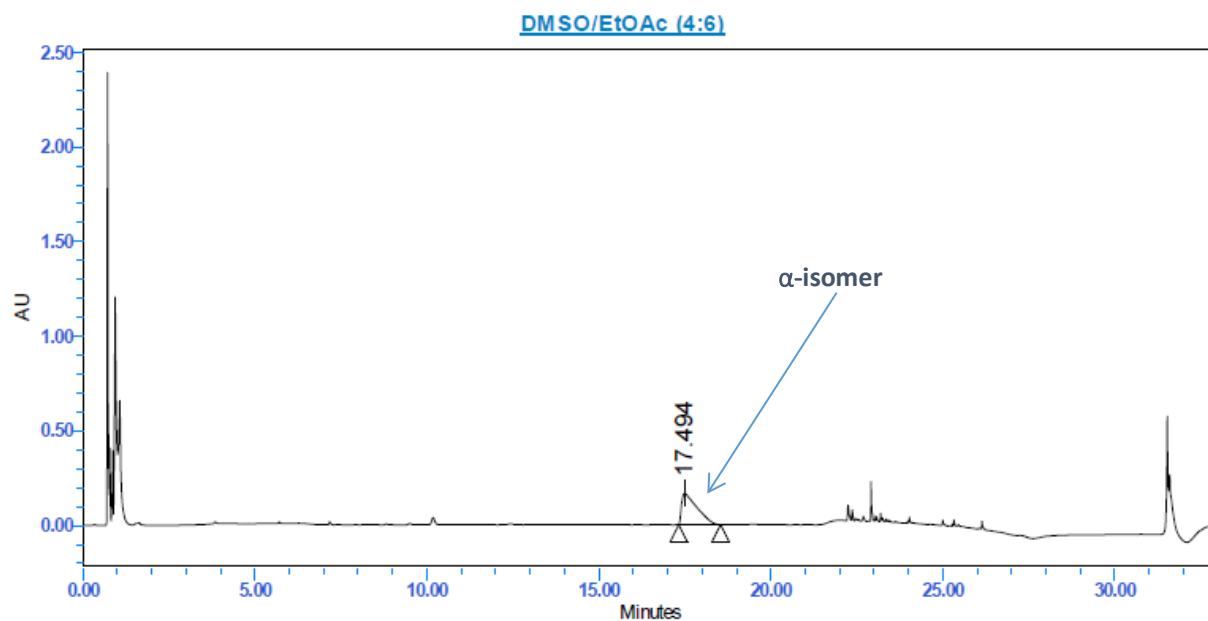

**Peak Results**

| Name | RT     | Area    | Height | Amount | % Area |
|------|--------|---------|--------|--------|--------|
| 1    | 17.494 | 5159581 | 166304 |        | 100.00 |

Aspartimide formation without Oxyma Pure ( $\alpha$ - $\beta$ -isomerisation) in DMSO/EtOAc (4:6), without Oxyma, with spike, method H

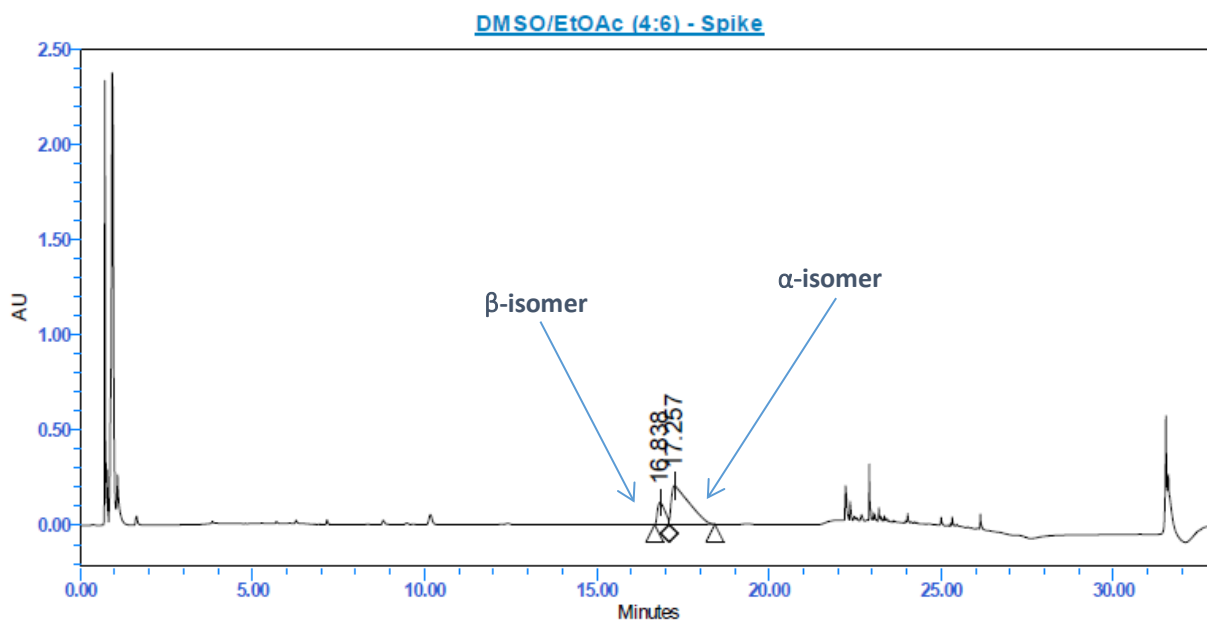

**Peak Results**

|   | Name | RT     | Area    | Height | Amount | % Area |
|---|------|--------|---------|--------|--------|--------|
| 1 |      | 16.838 | 1757530 | 116762 |        | 19.37  |
| 2 |      | 17.257 | 7316642 | 204229 |        | 80.63  |

Aspartimide formation without Oxyma Pure ( $\alpha$ - $\beta$ -isomerisation) in DMSO/EtOAc (4:6), with Oxyma, no spike, method H

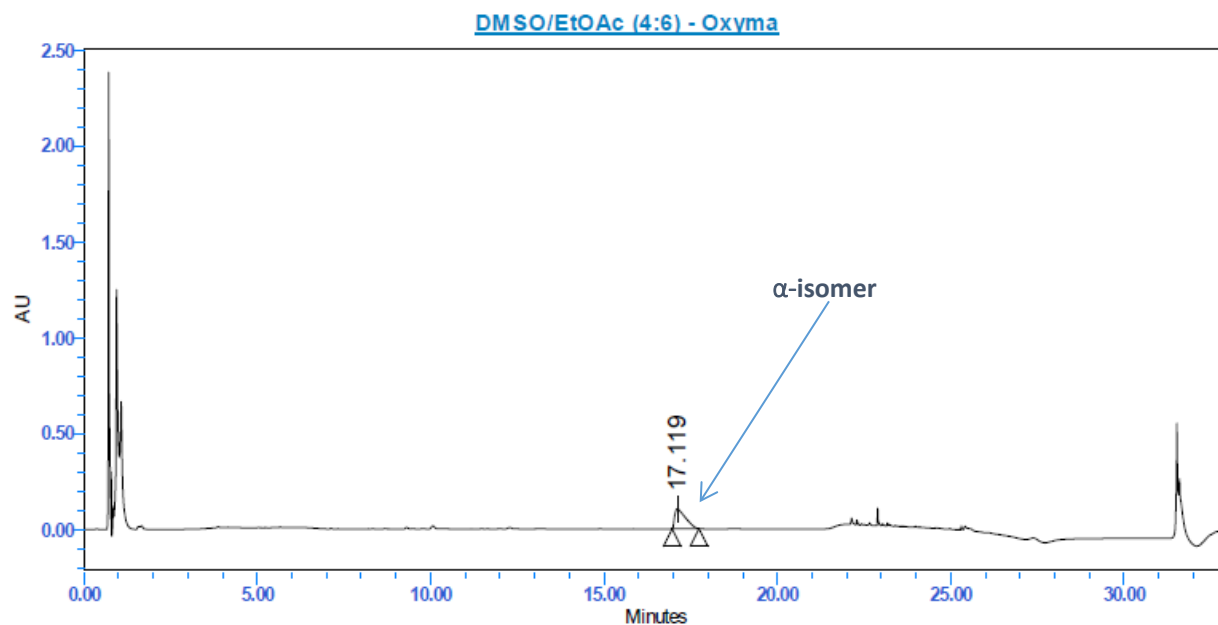

**Peak Results**

| Name | RT     | Area    | Height | Amount | % Area |
|------|--------|---------|--------|--------|--------|
| 1    | 17.119 | 2226938 | 104851 |        | 100.00 |



Aspartimide formation without Oxyma Pure ( $\alpha$ - $\beta$ -isomerisation) in DMSO/EtOAc (4:6), with Oxyma, with spike, method H

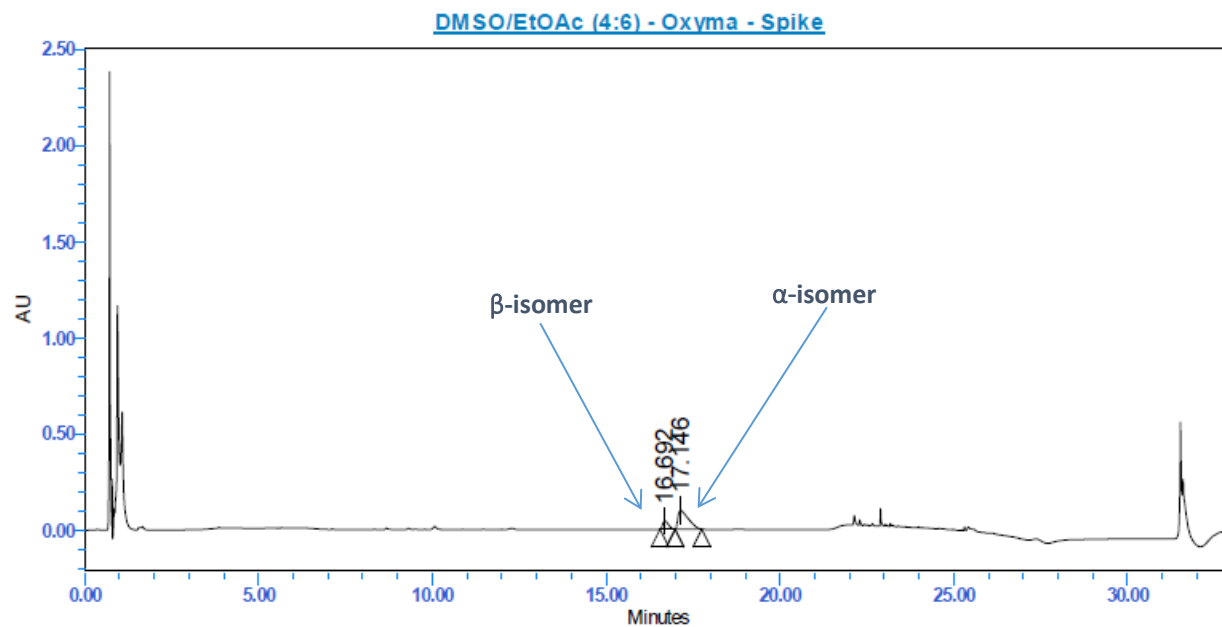

Peak Results

| Name | RT     | Area    | Height | Amount | % Area |
|------|--------|---------|--------|--------|--------|
| 1    | 16.692 | 506388  | 43417  |        | 19.93  |
| 2    | 17.146 | 2034735 | 98954  |        | 80.07  |

Aspartimide formation without Oxyma Pure ( $\alpha$ - $\beta$ -isomerisation) in DMSO/EtOAc (6:4), without Oxyma, no spike, method H

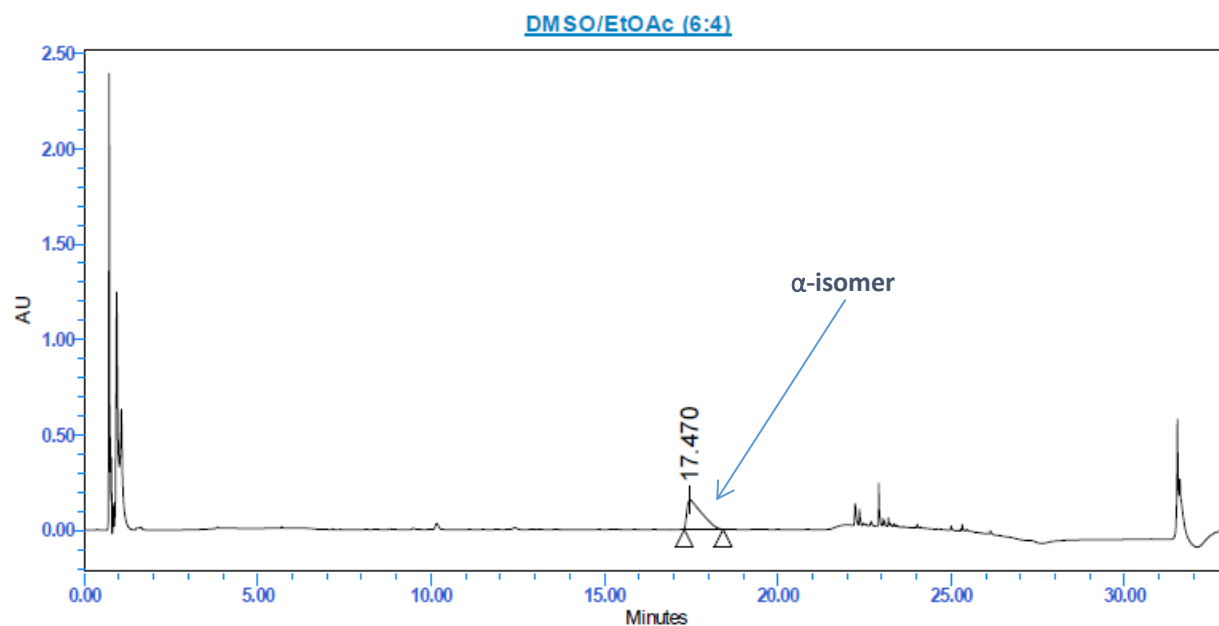

**Peak Results**

| Name | RT     | Area    | Height | Amount | % Area |
|------|--------|---------|--------|--------|--------|
| 1    | 17.470 | 4563623 | 155171 |        | 100.00 |

Aspartimide formation without Oxyma Pure ( $\alpha$ - $\beta$ -isomerisation) in DMSO/EtOAc (6:4), without Oxyma, with spike, method H

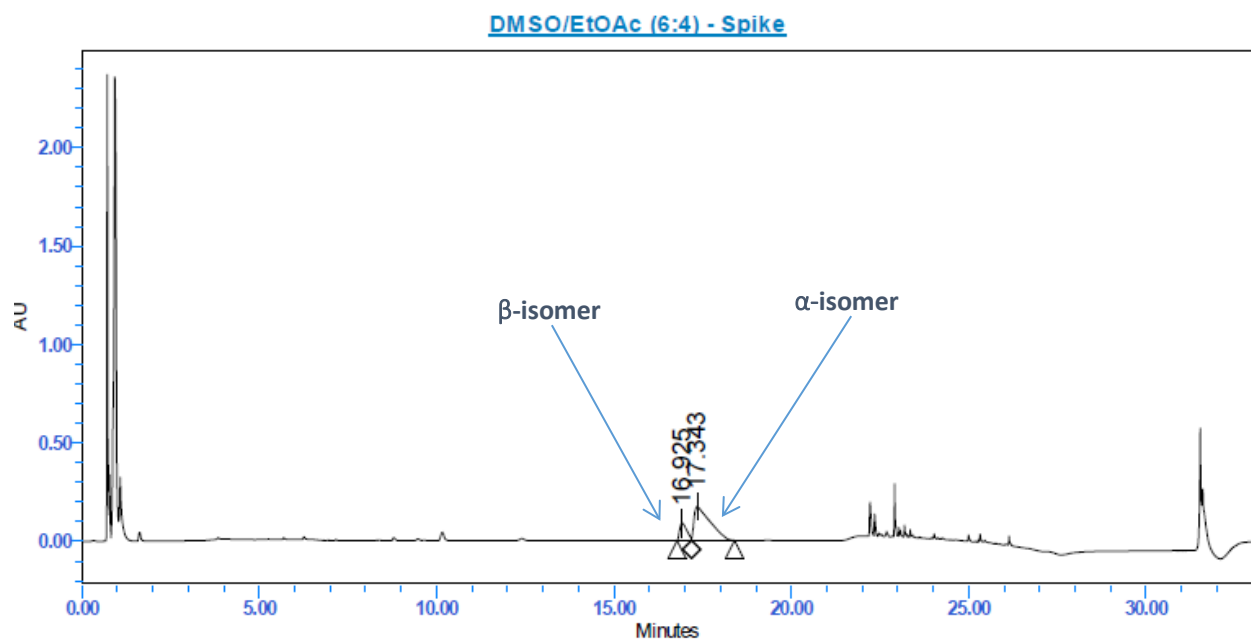

**Peak Results**

| Name | RT     | Area    | Height | Amount | % Area |
|------|--------|---------|--------|--------|--------|
| 1    | 16.925 | 1229292 | 88057  |        | 18.48  |
| 2    | 17.343 | 5422386 | 172361 |        | 81.52  |

Aspartimide formation without Oxyma Pure ( $\alpha$ - $\beta$ -isomerisation) in DMSO/EtOAc (6:4), with Oxyma, no spike, method H

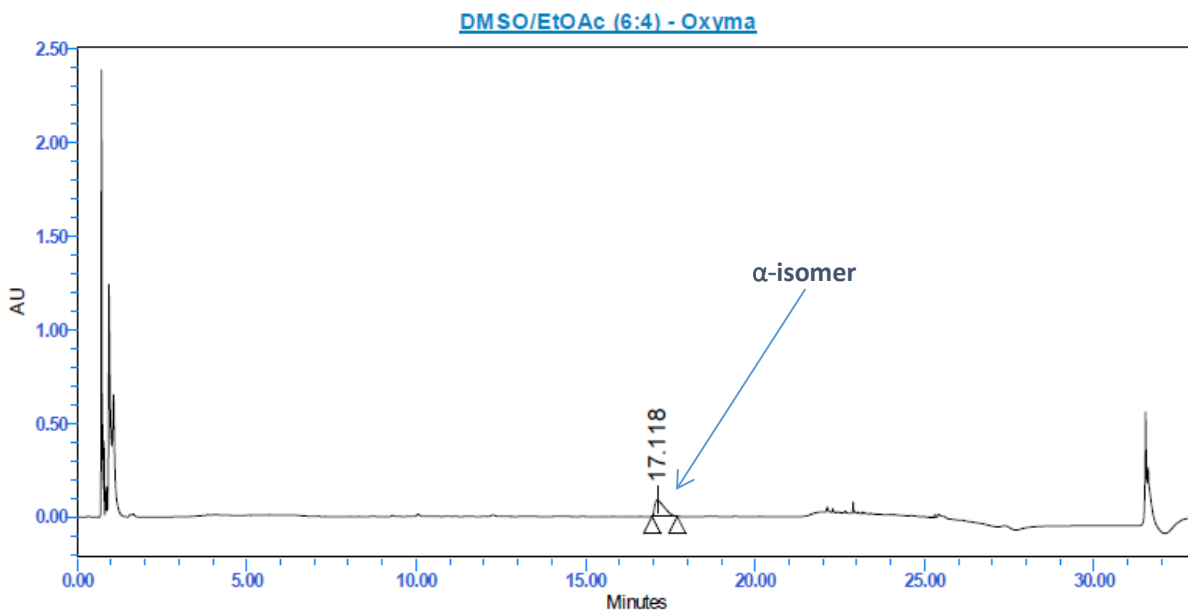

Peak Results

| Name | RT     | Area    | Height | Amount | % Area |
|------|--------|---------|--------|--------|--------|
| 1    | 17.118 | 1717037 | 88794  |        | 100.00 |

Aspartimide formation without Oxyma Pure ( $\alpha$ - $\beta$ -isomerisation) in DMSO/EtOAc (6:4), with Oxyma, with spike, method H

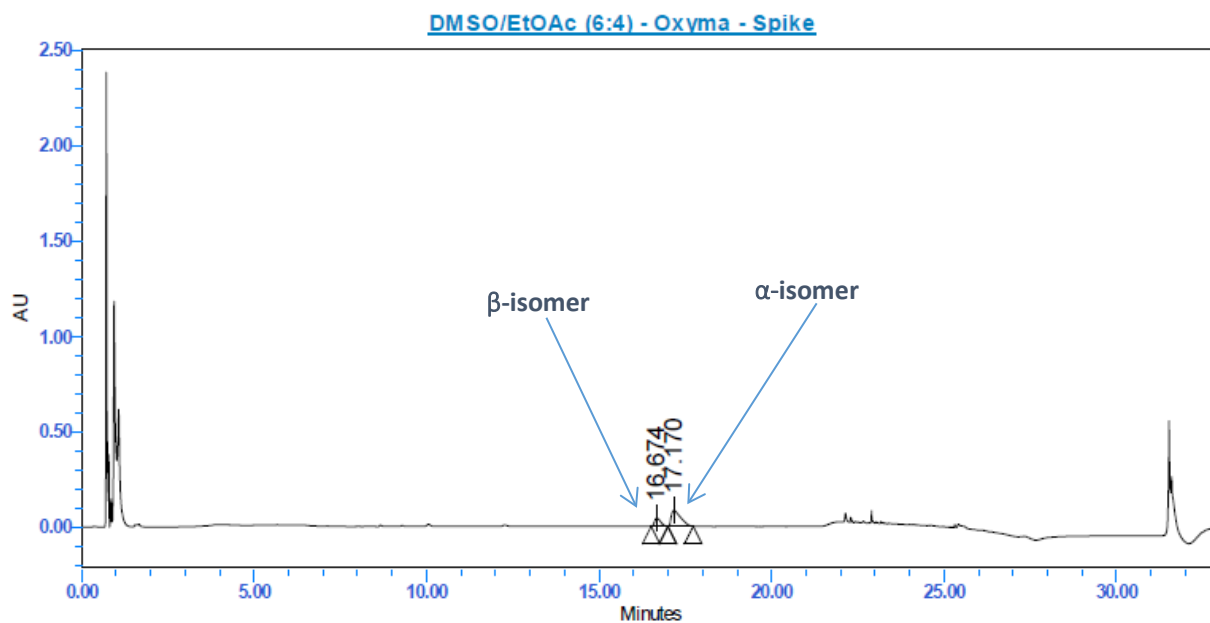

Peak Results

| Name | RT     | Area    | Height | Amount | % Area |
|------|--------|---------|--------|--------|--------|
| 1    | 16.674 | 525050  | 43293  |        | 24.96  |
| 2    | 17.170 | 1578201 | 83723  |        | 75.04  |

Aspartimide formation without Oxyma Pure ( $\alpha$ - $\beta$ -isomerisation) in DMSO/DOL (3:7), without Oxyma, no spike, method H

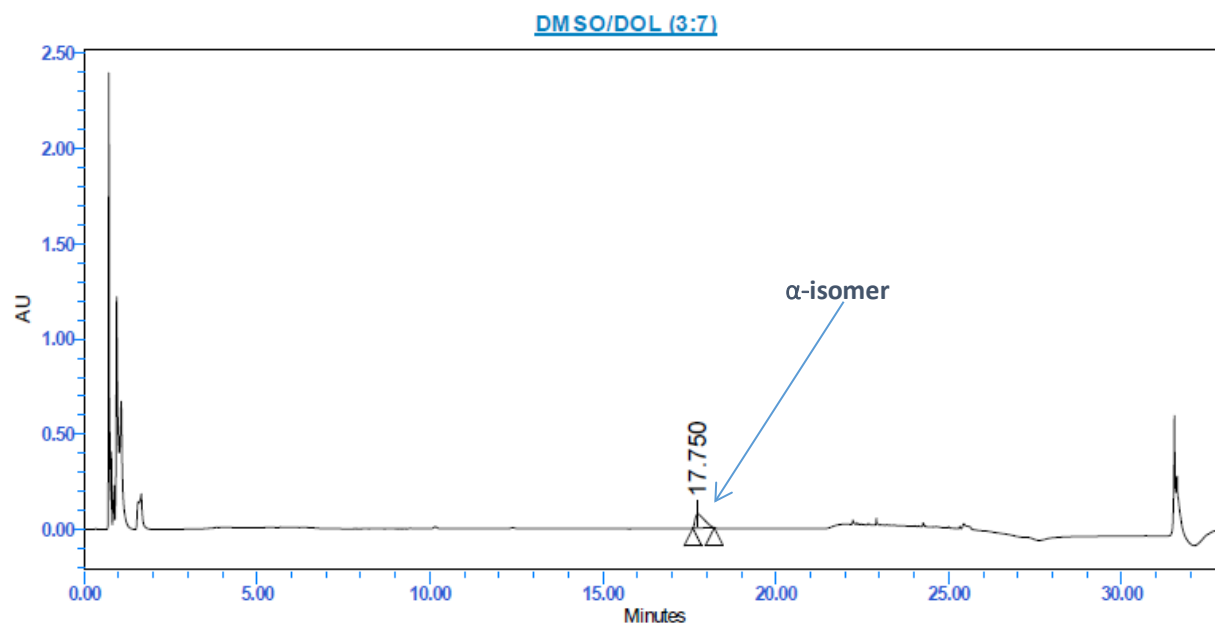

**Peak Results**

| Name | RT     | Area    | Height | Amount | % Area |
|------|--------|---------|--------|--------|--------|
| 1    | 17.750 | 1386092 | 75223  |        | 100.00 |

Aspartimide formation without Oxyma Pure ( $\alpha$ - $\beta$ -isomerisation) in DMSO/DOL (3:7), without Oxyma, with spike, method H

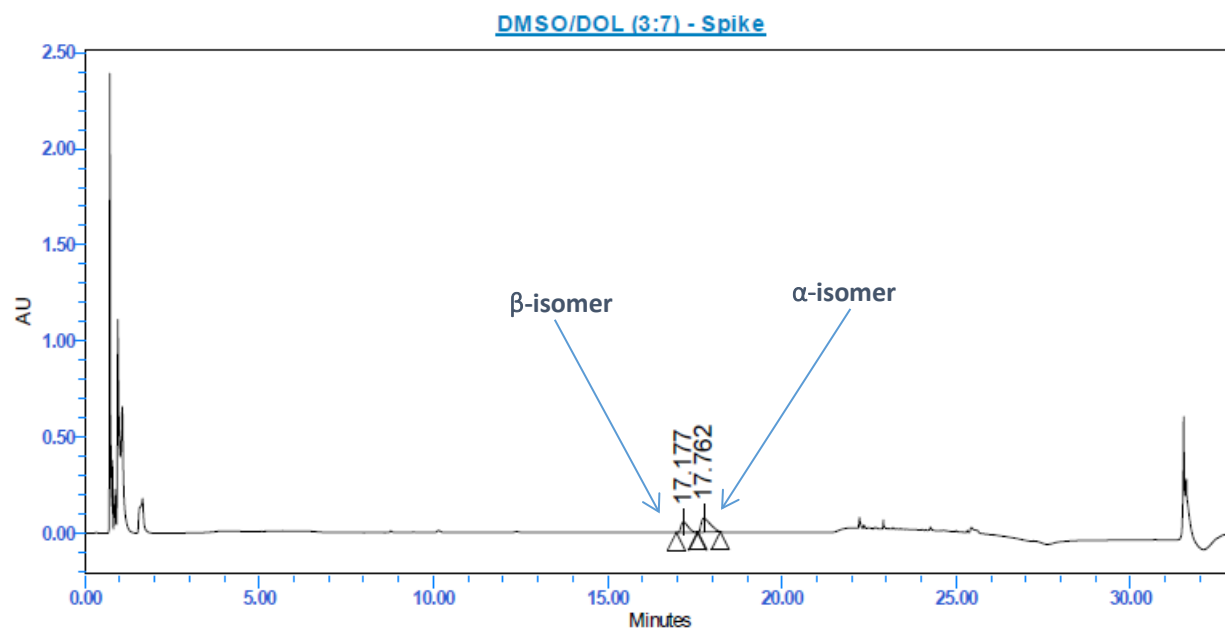

Peak Results

| Name | RT     | Area    | Height | Amount | % Area |
|------|--------|---------|--------|--------|--------|
| 1    | 17.177 | 755524  | 54245  |        | 36.35  |
| 2    | 17.762 | 1322673 | 72867  |        | 63.65  |

Aspartimide formation without Oxyma Pure ( $\alpha$ - $\beta$ -isomerisation) in DMSO/DOL (3:7), with Oxyma, no spike, method H

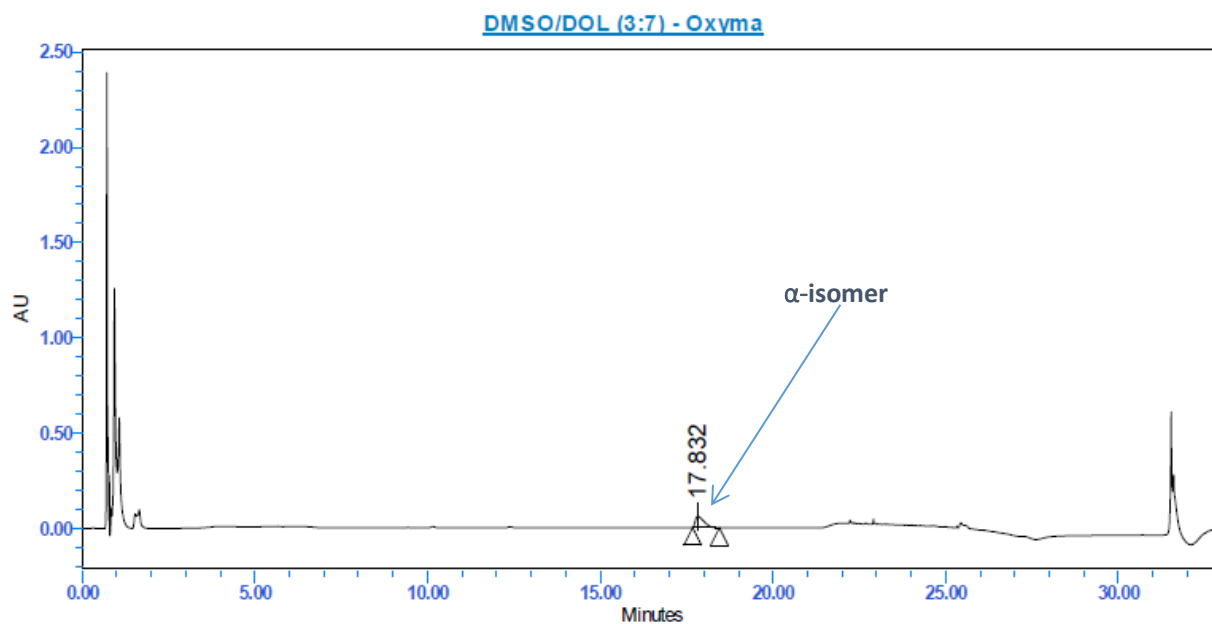

**Peak Results**

| Name | RT     | Area    | Height | Amount | % Area |
|------|--------|---------|--------|--------|--------|
| 1    | 17.832 | 1033543 | 59806  |        | 100.00 |



Aspartimide formation without Oxyma Pure ( $\alpha$ - $\beta$ -isomerisation) in DMSO/DOL (3:7), with Oxyma, with spike, method H

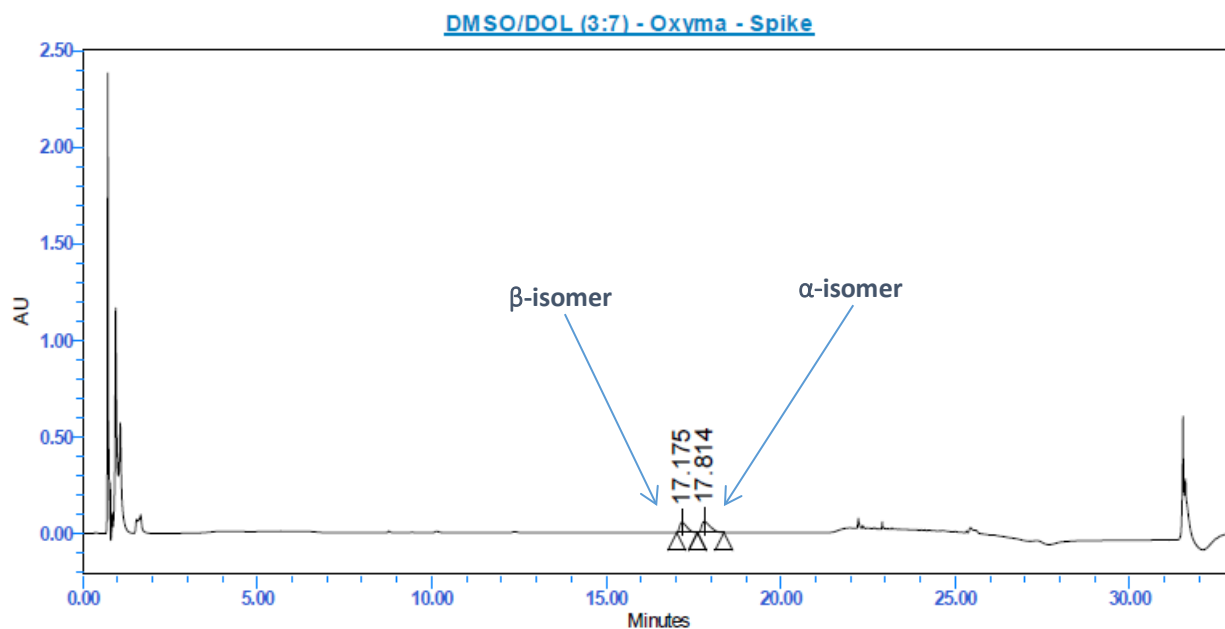

**Peak Results**

| Name | RT     | Area   | Height | Amount | % Area |
|------|--------|--------|--------|--------|--------|
| 1    | 17.175 | 747863 | 52203  |        | 43.41  |
| 2    | 17.814 | 974979 | 56834  |        | 56.59  |

Aspartimide formation without Oxyma Pure ( $\alpha$ - $\beta$ -isomerisation) in DMSO/DOL (4:6), without Oxyma, no spike, method H

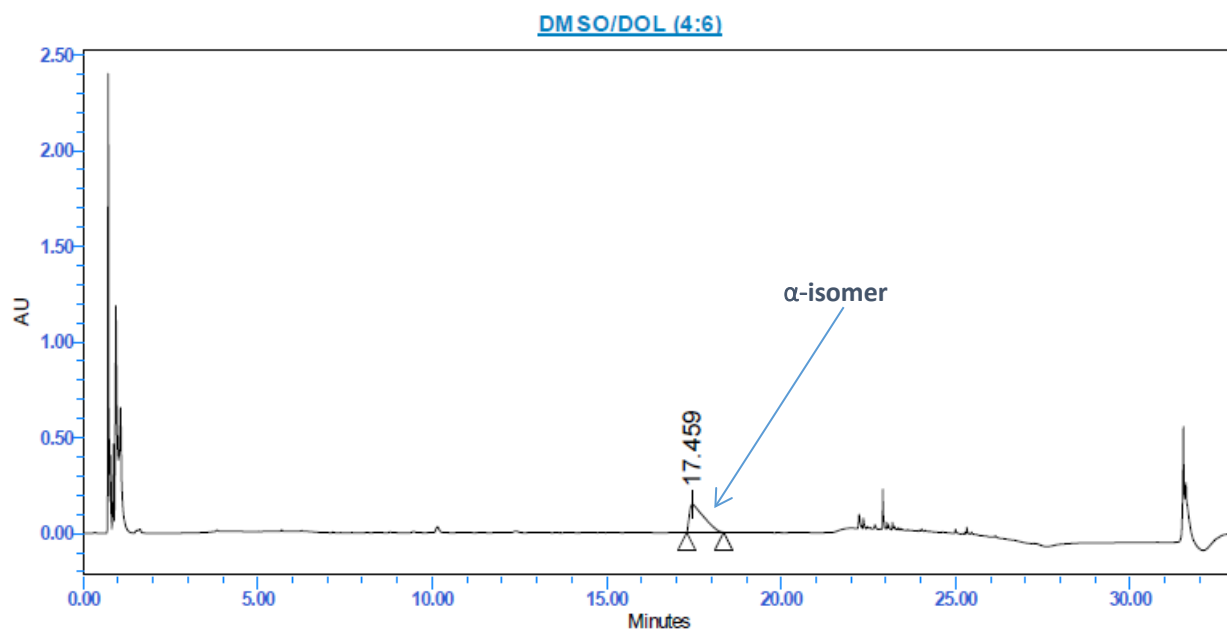

Peak Results

| Name | RT     | Area    | Height | Amount | % Area |
|------|--------|---------|--------|--------|--------|
| 1    | 17.459 | 4201415 | 147630 |        | 100.00 |

Aspartimide formation without Oxyma Pure ( $\alpha$ - $\beta$ -isomerisation) in DMSO/DOL (4:6), without Oxyma, with spike, method H

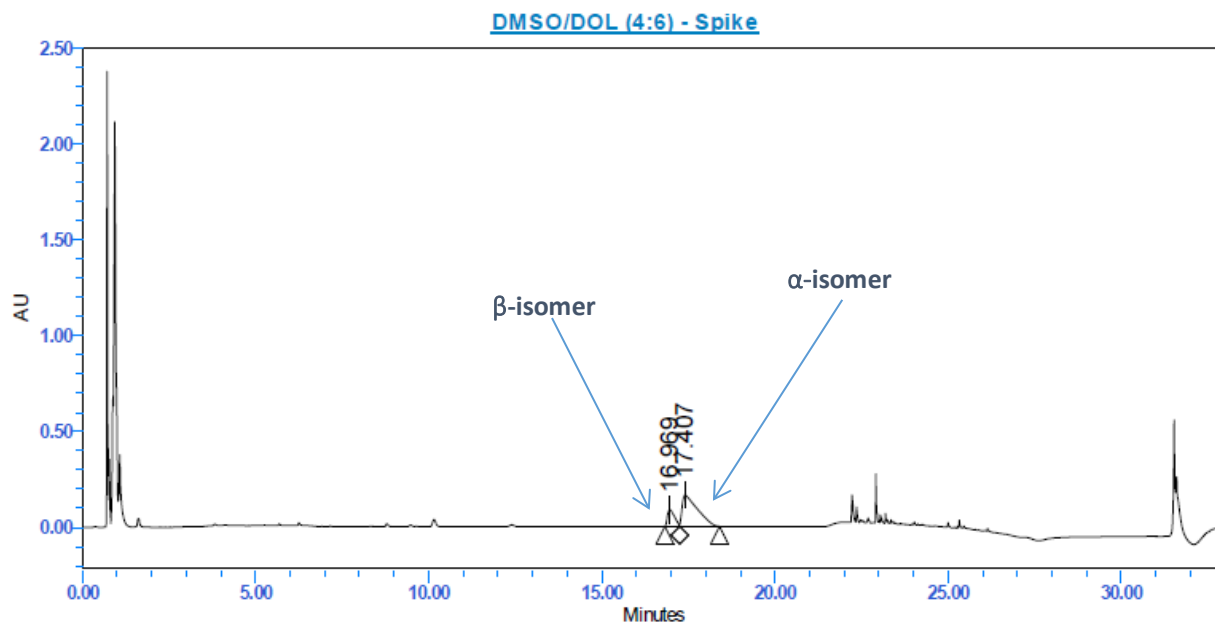

Peak Results

| Name | RT     | Area    | Height | Amount | % Area |
|------|--------|---------|--------|--------|--------|
| 1    | 16.969 | 1247628 | 87235  |        | 19.86  |
| 2    | 17.407 | 5033716 | 164248 |        | 80.14  |

Aspartimide formation without Oxyma Pure ( $\alpha$ - $\beta$ -isomerisation) in DMSO/DOL (4:6), with Oxyma, no spike, method H

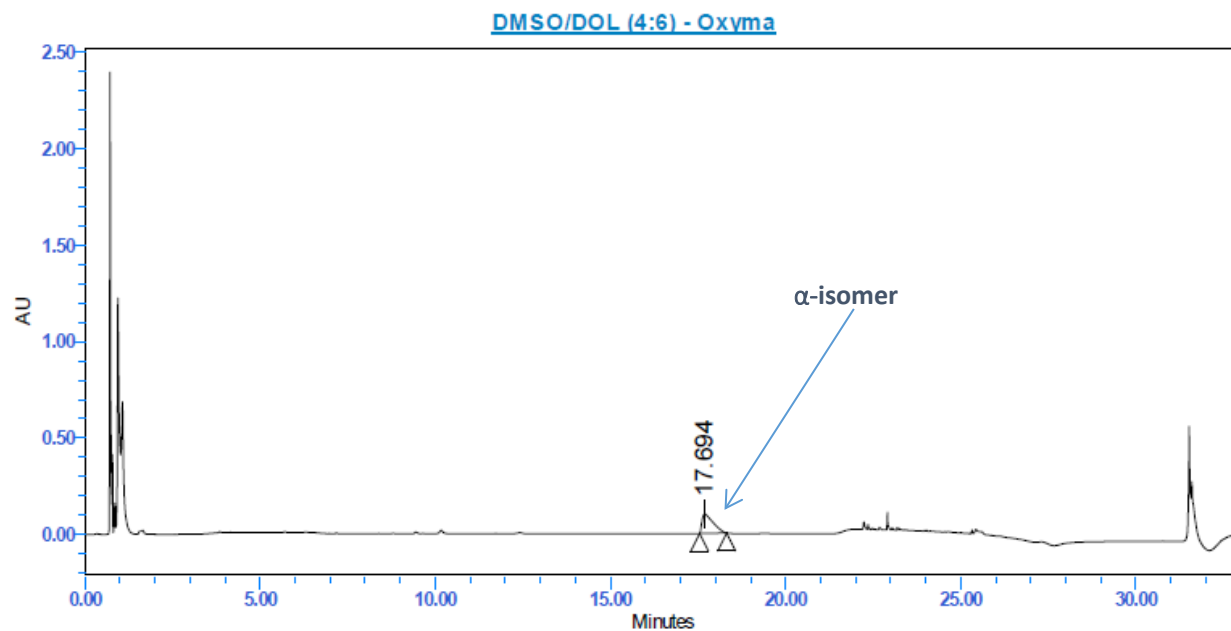

**Peak Results**

| Name | RT     | Area    | Height | Amount | % Area |
|------|--------|---------|--------|--------|--------|
| 1    | 17.694 | 2193602 | 99834  |        | 100.00 |

Aspartimide formation without Oxyma Pure ( $\alpha$ - $\beta$ -isomerisation) in DMSO/DOL (4:6), with Oxyma, with spike, method H

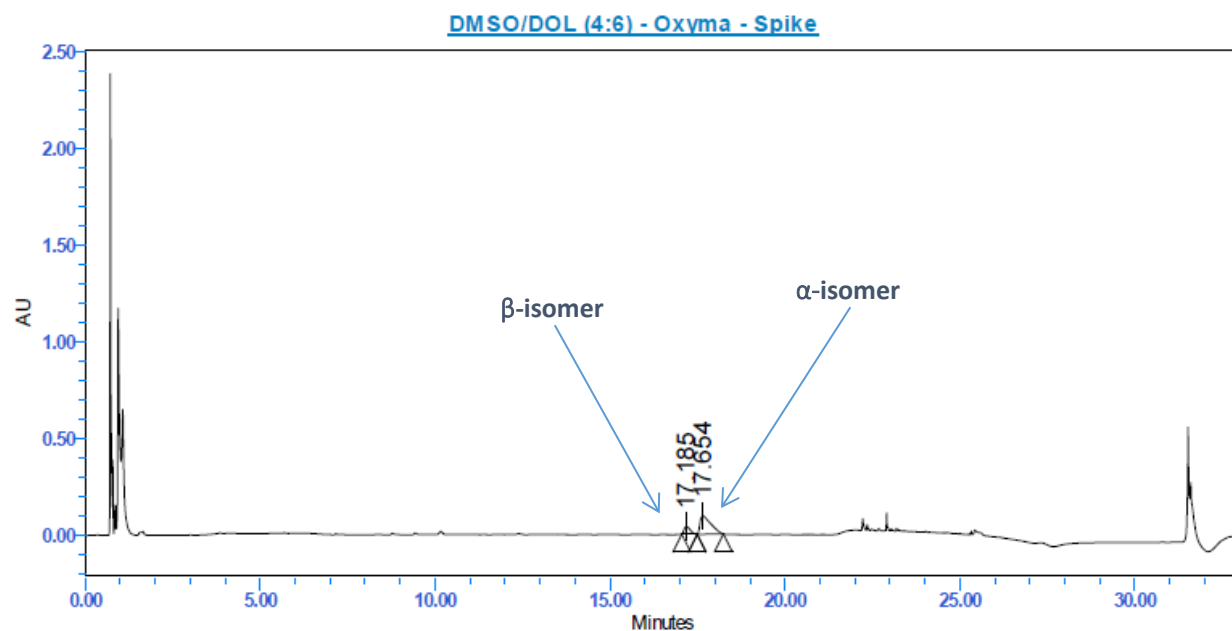

**Peak Results**

|   | Name | RT     | Area    | Height | Amount | % Area |
|---|------|--------|---------|--------|--------|--------|
| 1 |      | 17.185 | 491979  | 40905  |        | 19.40  |
| 2 |      | 17.654 | 2044173 | 95756  |        | 80.60  |

Aspartimide formation without Oxyma Pure ( $\alpha$ - $\beta$ -isomerisation) in NBP/DOL (4:6), without Oxyma, no spike, method H

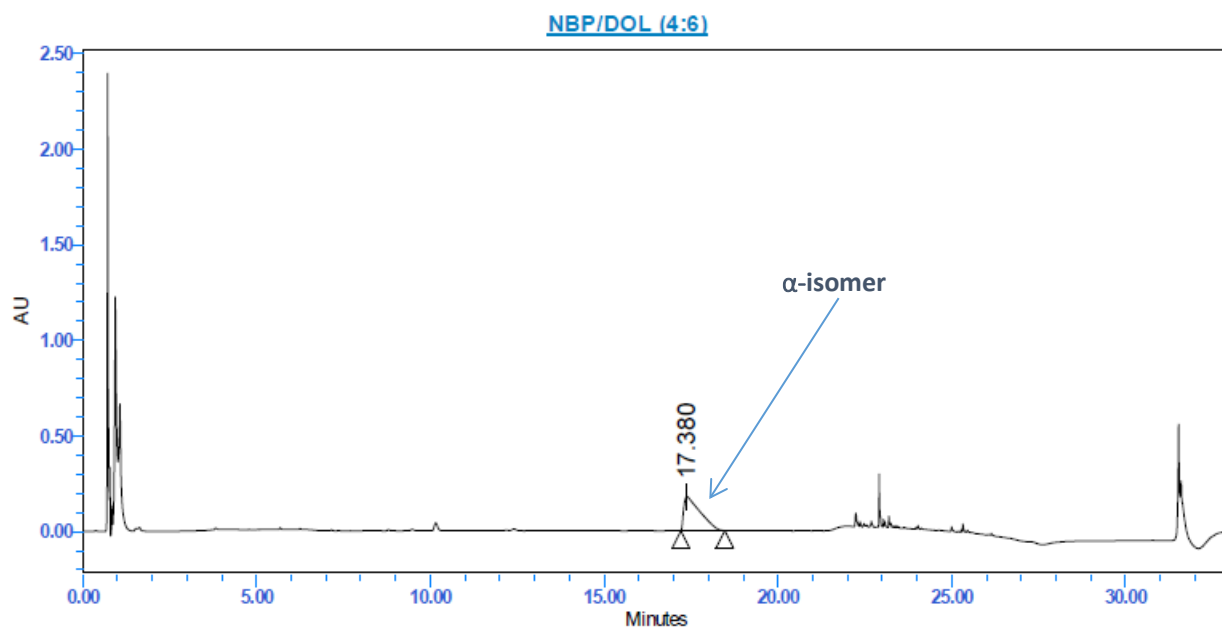

**Peak Results**

|   | Name | RT     | Area    | Height | Amount | % Area |
|---|------|--------|---------|--------|--------|--------|
| 1 |      | 17.380 | 5823822 | 178695 |        | 100.00 |

Aspartimide formation without Oxyma Pure ( $\alpha$ - $\beta$ -isomerisation) in NBP/DOL (4:6), without Oxyma, with spike, method H

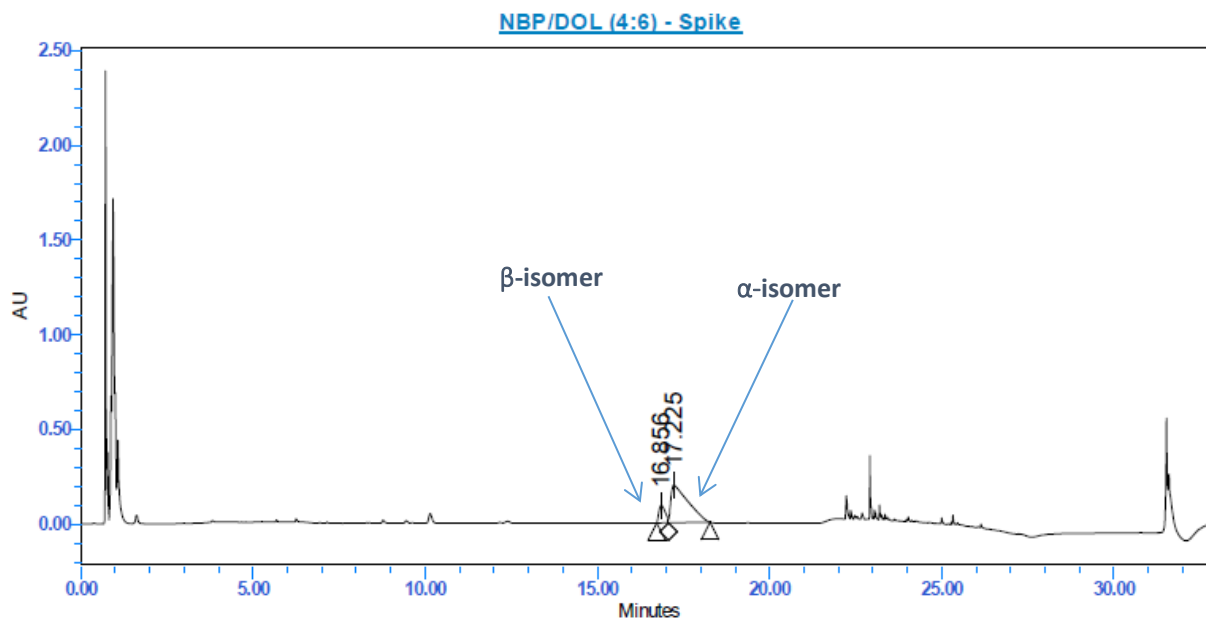

**Peak Results**

|   | Name | RT     | Area    | Height | Amount | % Area |
|---|------|--------|---------|--------|--------|--------|
| 1 |      | 16.856 | 1182887 | 91919  |        | 14.67  |
| 2 |      | 17.225 | 6881198 | 199176 |        | 85.33  |

Aspartimide formation without Oxyma Pure ( $\alpha$ - $\beta$ -isomerisation) in NBP/DOL (4:6), with Oxyma, no spike, method H

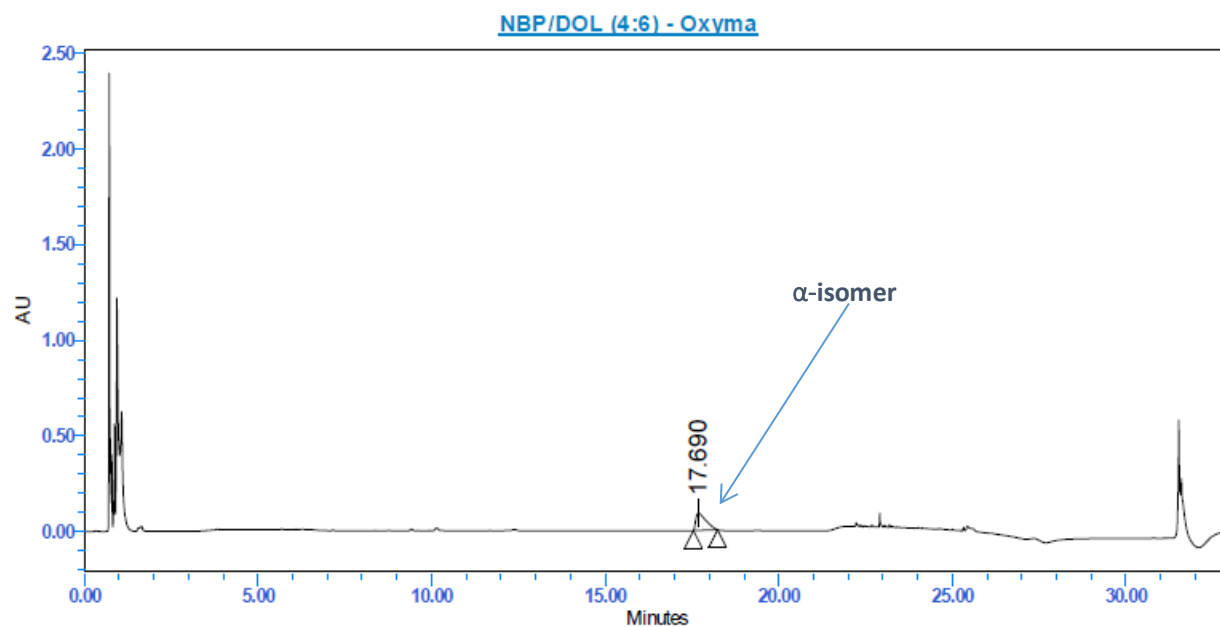

**Peak Results**

| Name | RT     | Area    | Height | Amount | % Area |
|------|--------|---------|--------|--------|--------|
| 1    | 17.690 | 1829996 | 89985  |        | 100.00 |



Aspartimide formation without Oxyma Pure ( $\alpha$ - $\beta$ -isomerisation) in NBP/DOL (4:6), with Oxyma, with spike, method H

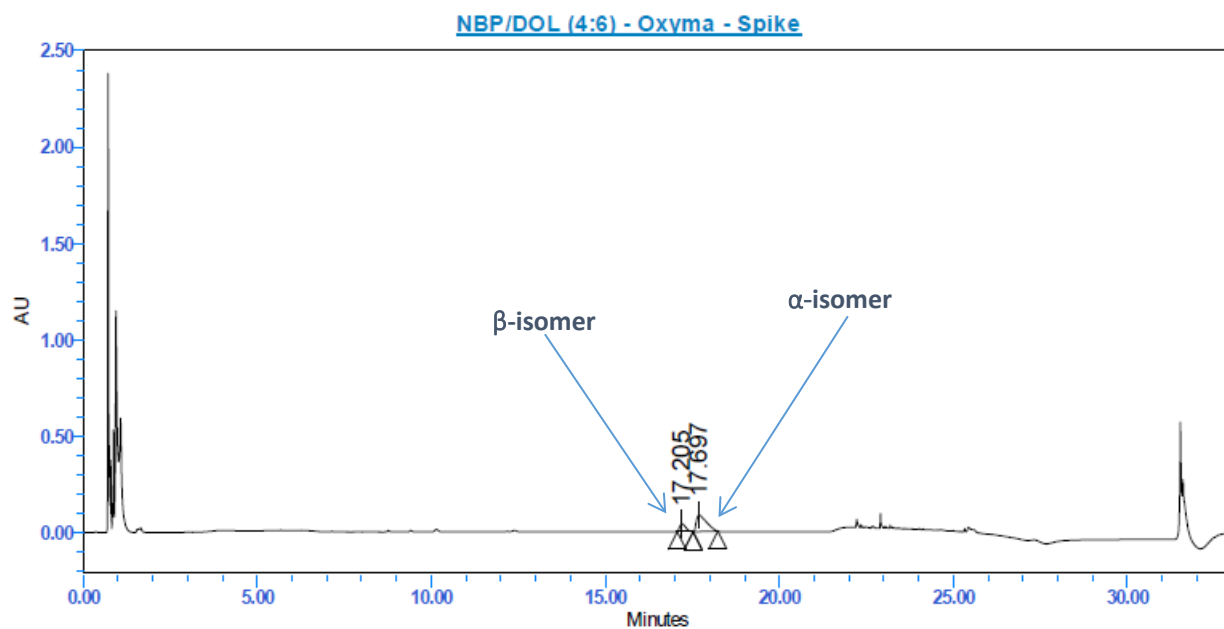

**Peak Results**

| Name | RT     | Area    | Height | Amount | % Area |
|------|--------|---------|--------|--------|--------|
| 1    | 17.205 | 487826  | 40254  |        | 22.00  |
| 2    | 17.697 | 1729336 | 86222  |        | 78.00  |

Aspartimide formation without Oxyma Pure ( $\alpha$ - $\beta$ -isomerisation) in NFM/DOL (2:8), without Oxyma, no spike, method H

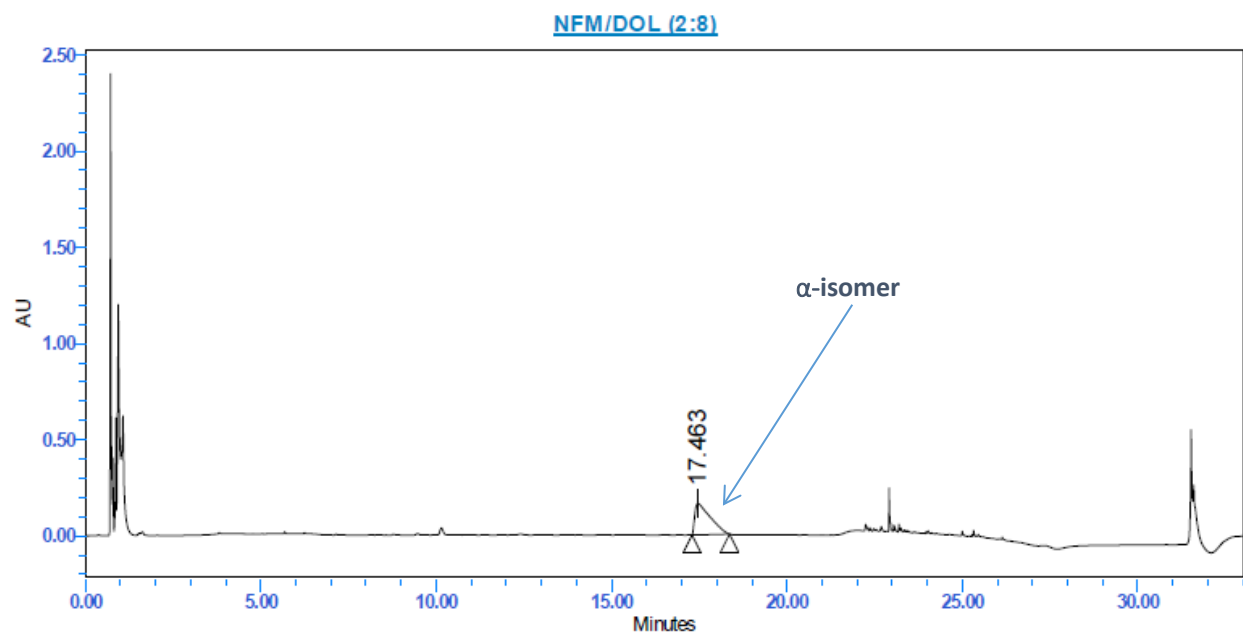

**Peak Results**

| Name | RT     | Area    | Height | Amount | % Area |
|------|--------|---------|--------|--------|--------|
| 1    | 17.463 | 4989417 | 164683 |        | 100.00 |

Aspartimide formation without Oxyma Pure ( $\alpha$ - $\beta$ -isomerisation) in NFM/DOL (2:8), without Oxyma, with spike, method H

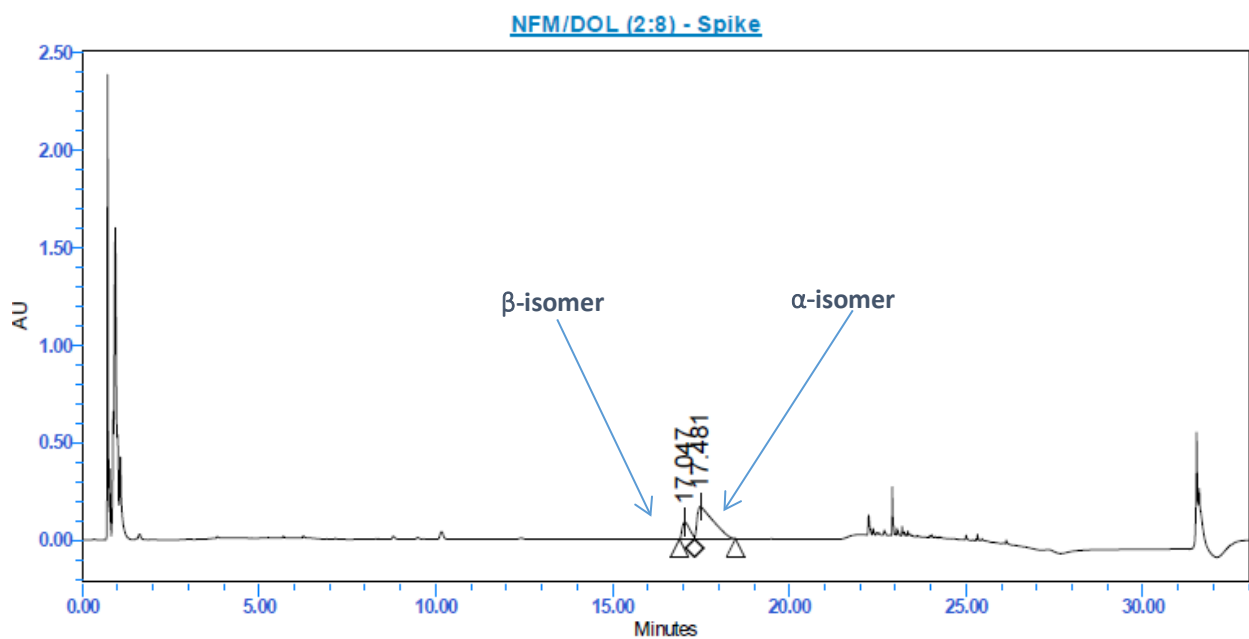

Peak Results

|   | Name | RT     | Area    | Height | Amount | % Area |
|---|------|--------|---------|--------|--------|--------|
| 1 |      | 17.047 | 1270863 | 87961  |        | 19.44  |
| 2 |      | 17.481 | 5265811 | 167063 |        | 80.56  |

Aspartimide formation without Oxyma Pure ( $\alpha$ - $\beta$ -isomerisation) in NFM/DOL (2:8), with Oxyma, no spike, method H

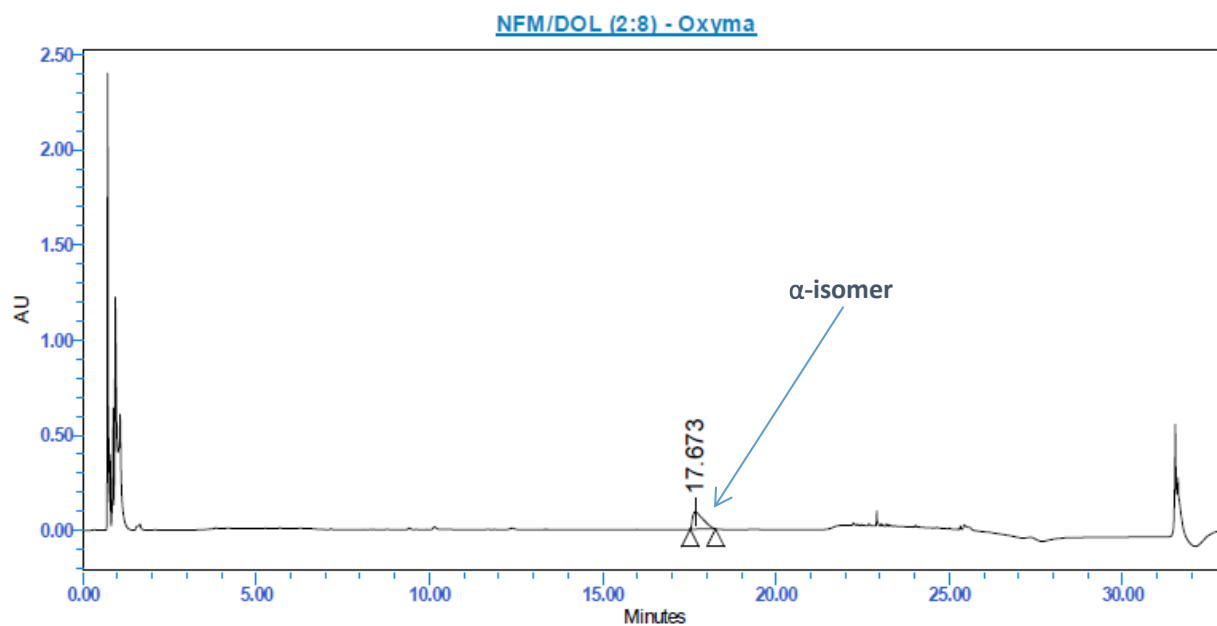

**Peak Results**

| Name | RT     | Area    | Height | Amount | % Area |
|------|--------|---------|--------|--------|--------|
| 1    | 17.673 | 1928392 | 92132  |        | 100.00 |

Aspartimide formation without Oxyma Pure ( $\alpha$ - $\beta$ -isomerisation) in NFM/DOL (2:8), with Oxyma, with spike, method H

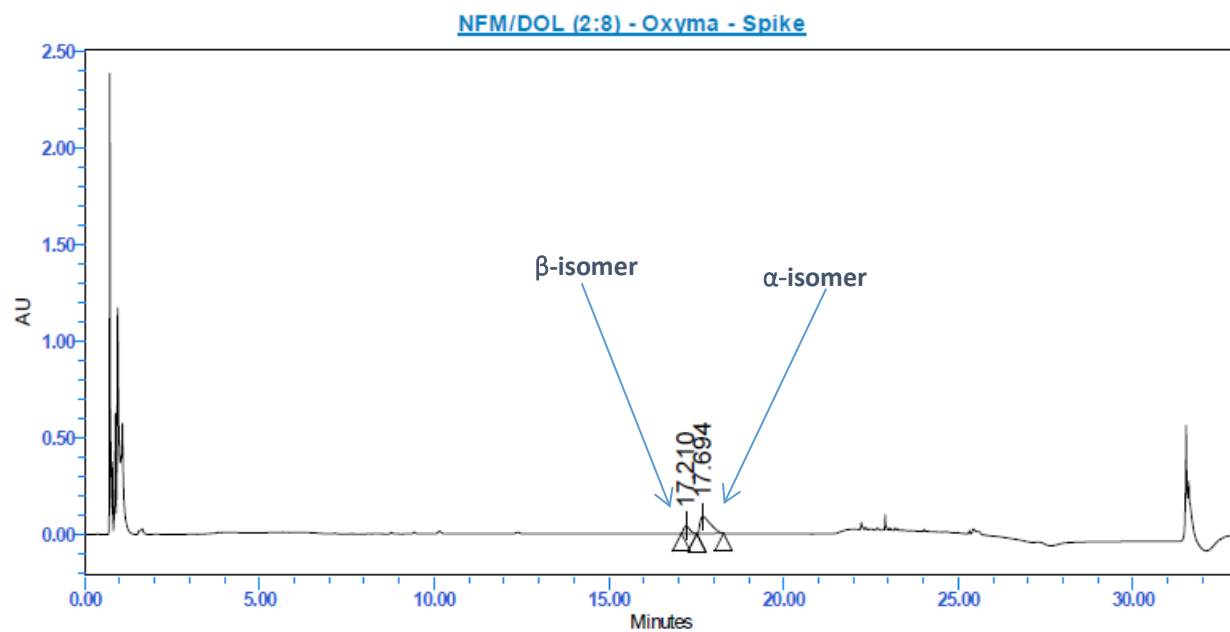

**Peak Results**

| Name | RT     | Area    | Height | Amount | % Area |
|------|--------|---------|--------|--------|--------|
| 1    | 17.210 | 463772  | 38938  |        | 20.04  |
| 2    | 17.694 | 1850247 | 89412  |        | 79.96  |

## 4.7 Amino acid racemisation

### Amino acid racemisation in DMF, His(Trt), no spike

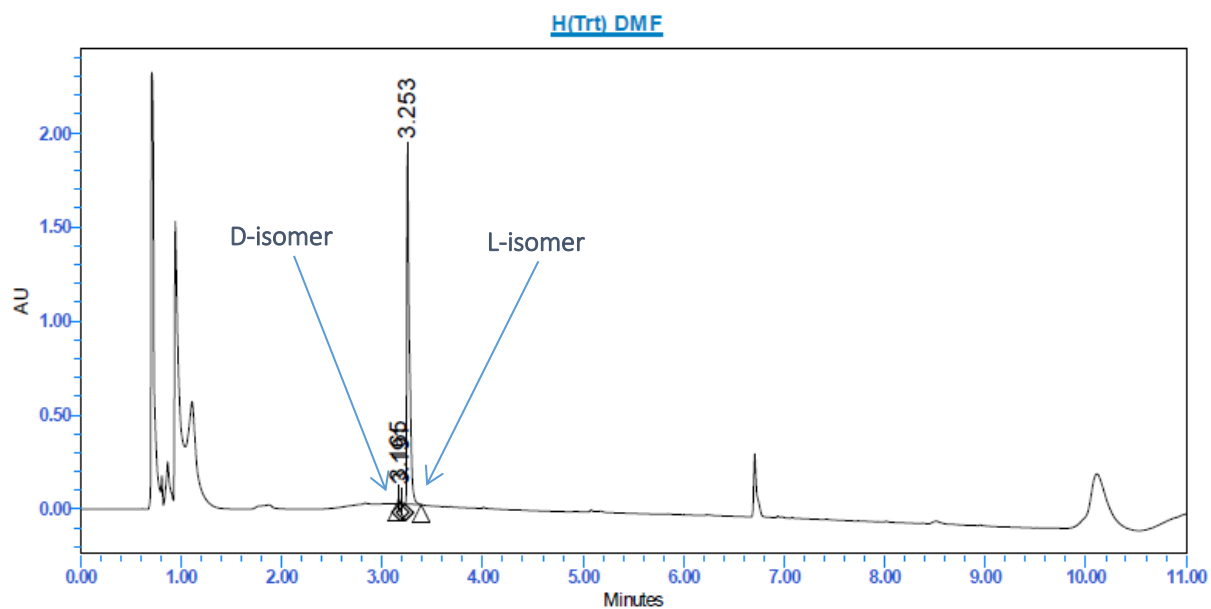

**Peak Results**

| Name | RT    | Area    | Height  | Amount | % Area |
|------|-------|---------|---------|--------|--------|
| 1    | 3.165 | 32578   | 30848   |        | 0.95   |
| 2    | 3.191 | 16559   | 11402   |        | 0.48   |
| 3    | 3.253 | 3370864 | 1861010 |        | 98.56  |

# Amino acid racemisation in DMF, His(Trt), with spike

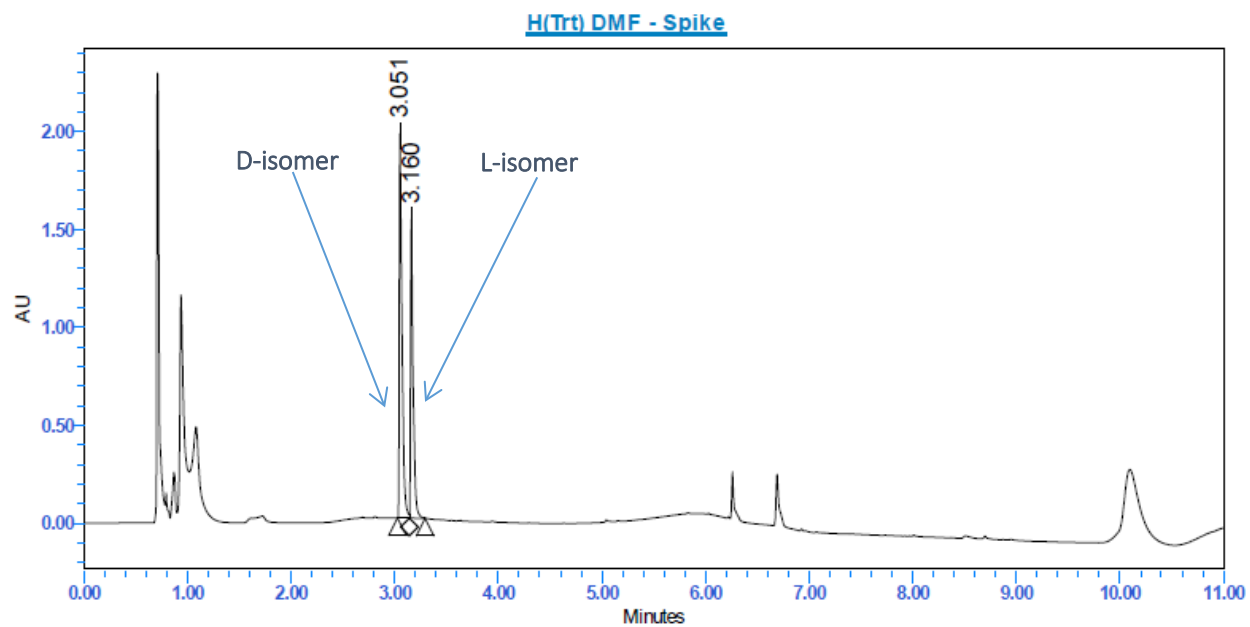

**Peak Results**

| Name | RT    | Area    | Height  | Amount | % Area |
|------|-------|---------|---------|--------|--------|
| 1    | 3.051 | 3647745 | 1962283 |        | 58.44  |
| 2    | 3.160 | 2593590 | 1525797 |        | 41.56  |

### Amino acid racemisation in DMSO/2-Me-THF (3:7), His(Trt), no spike

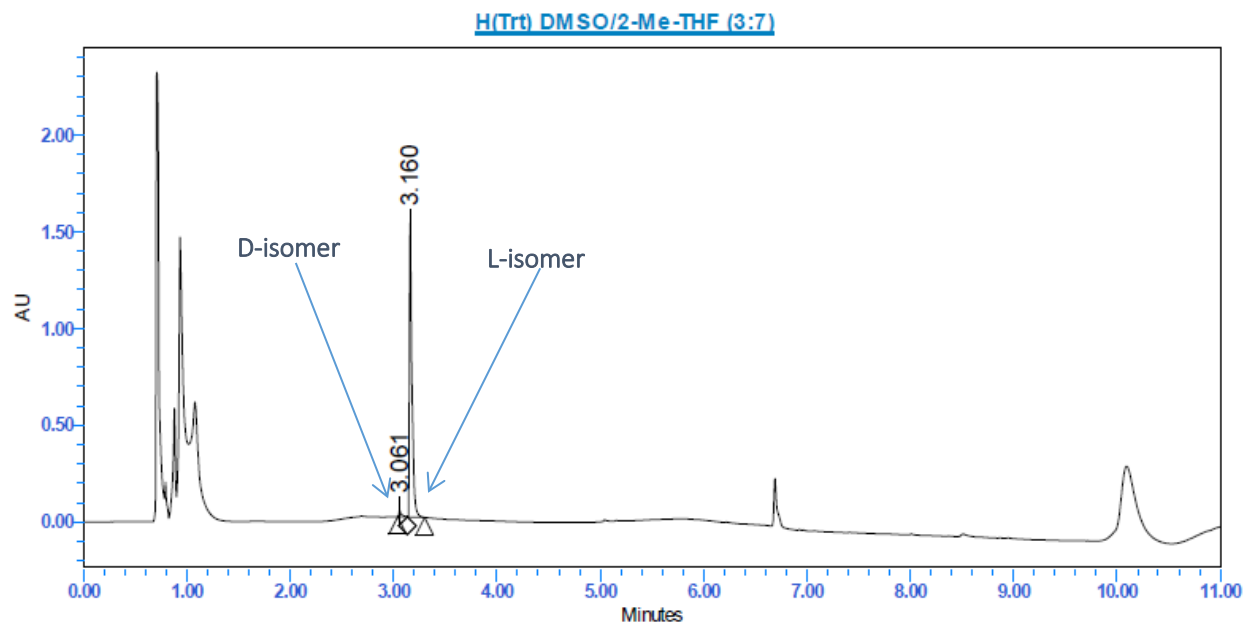

**Peak Results**

|   | Name | RT    | Area    | Height  | Amount | % Area |
|---|------|-------|---------|---------|--------|--------|
| 1 |      | 3.061 | 53683   | 32378   |        | 2.03   |
| 2 |      | 3.160 | 2586951 | 1520379 |        | 97.97  |



### Amino acid racemisation in DMSO/2-Me-THF (3:7), His(Trt), with spike

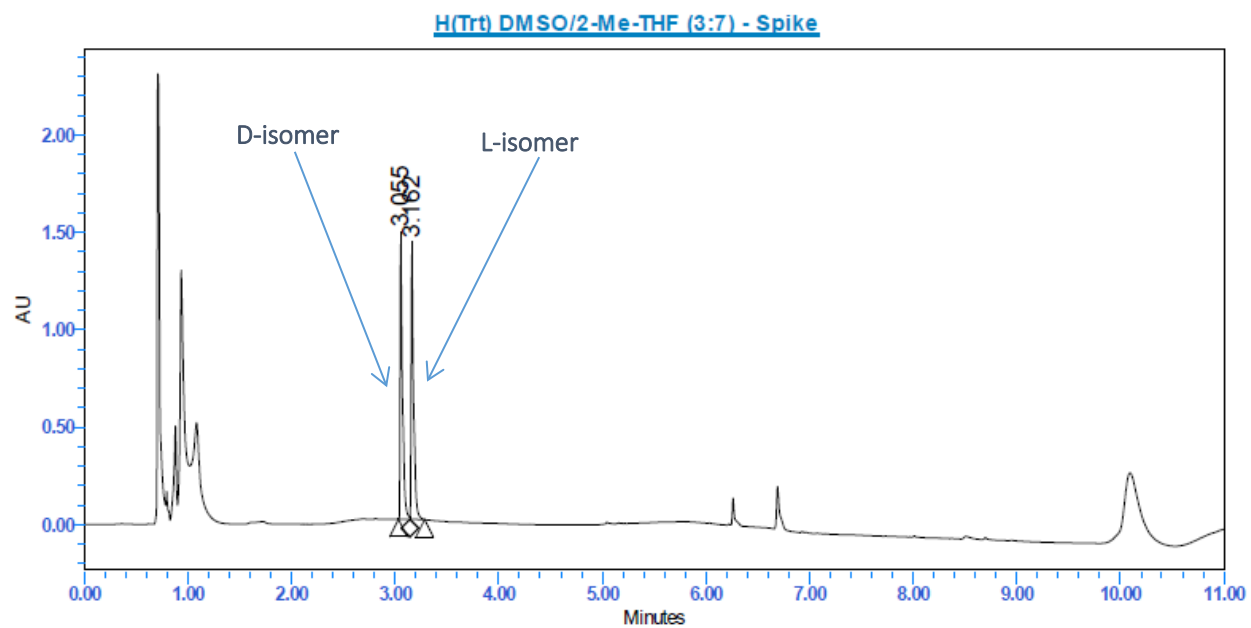

**Peak Results**

| Name | RT    | Area    | Height  | Amount | % Area |
|------|-------|---------|---------|--------|--------|
| 1    | 3.055 | 2248592 | 1411238 |        | 50.30  |
| 2    | 3.162 | 2221502 | 1359087 |        | 49.70  |

### Amino acid racemisation in DMF, His(Boc), no spike

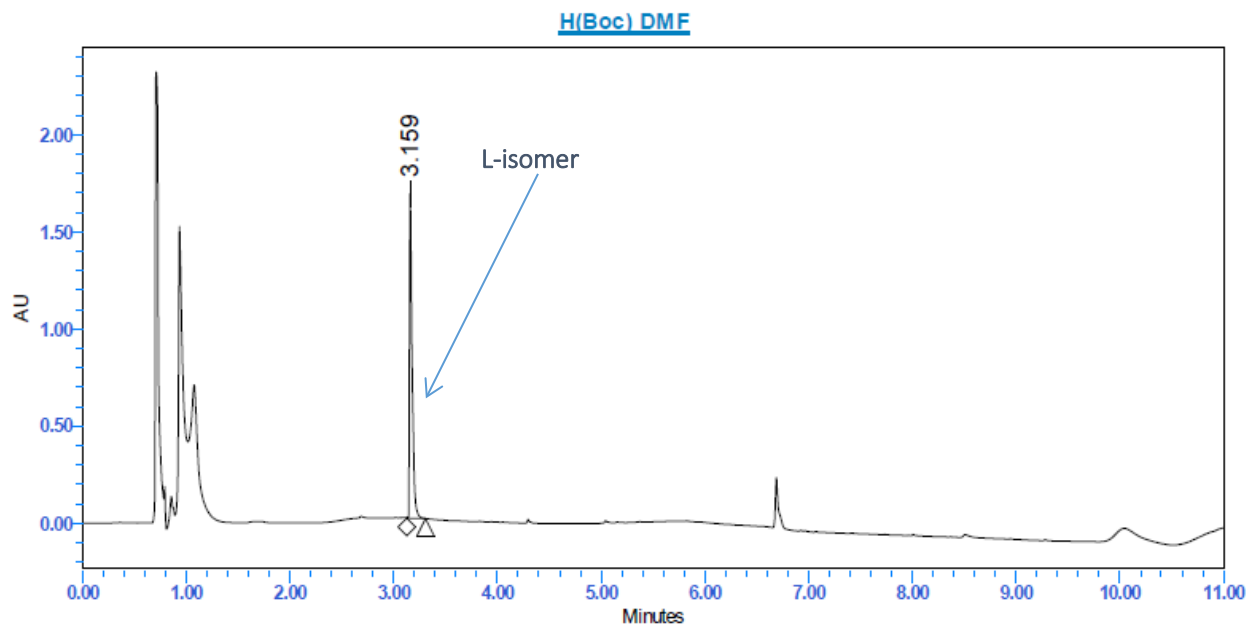

**Peak Results**

| Name | RT    | Area    | Height  | Amount | % Area |
|------|-------|---------|---------|--------|--------|
| 1    | 3.159 | 2970644 | 1671142 |        | 100.00 |

## Amino acid racemisation in DMF, His(Boc), with spike

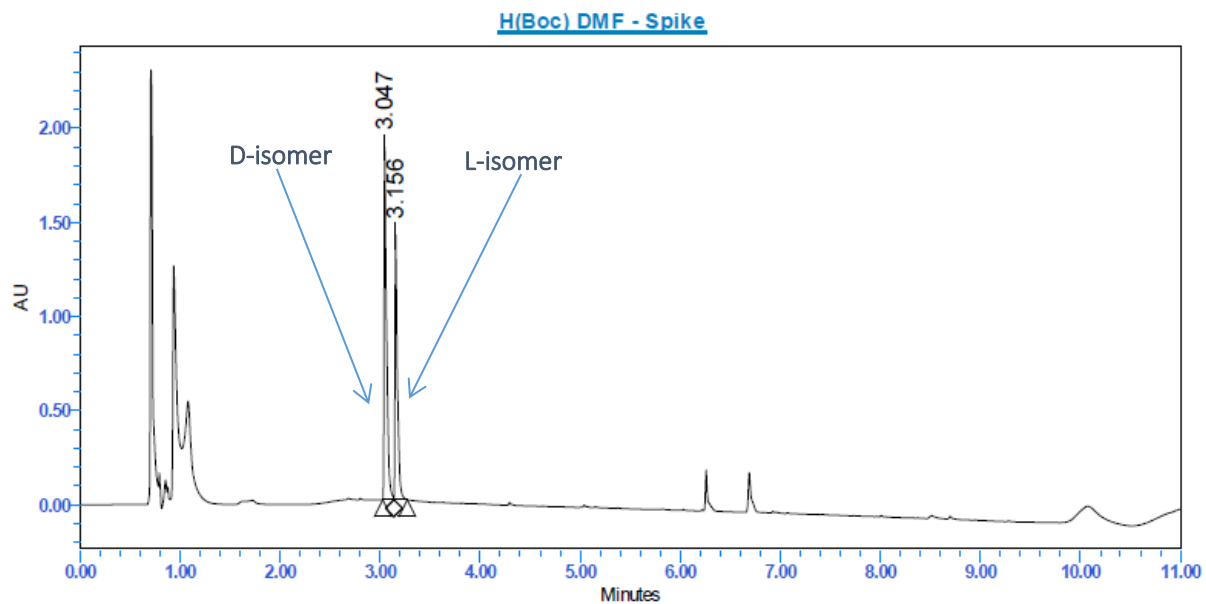

**Peak Results**

|   | Name | RT    | Area    | Height  | Amount | % Area |
|---|------|-------|---------|---------|--------|--------|
| 1 |      | 3.047 | 3316061 | 1872784 |        | 58.89  |
| 2 |      | 3.156 | 2314720 | 1408534 |        | 41.11  |

# Amino acid racemisation in DMSO/2-Me-THF (3:7), His(Boc), no spike

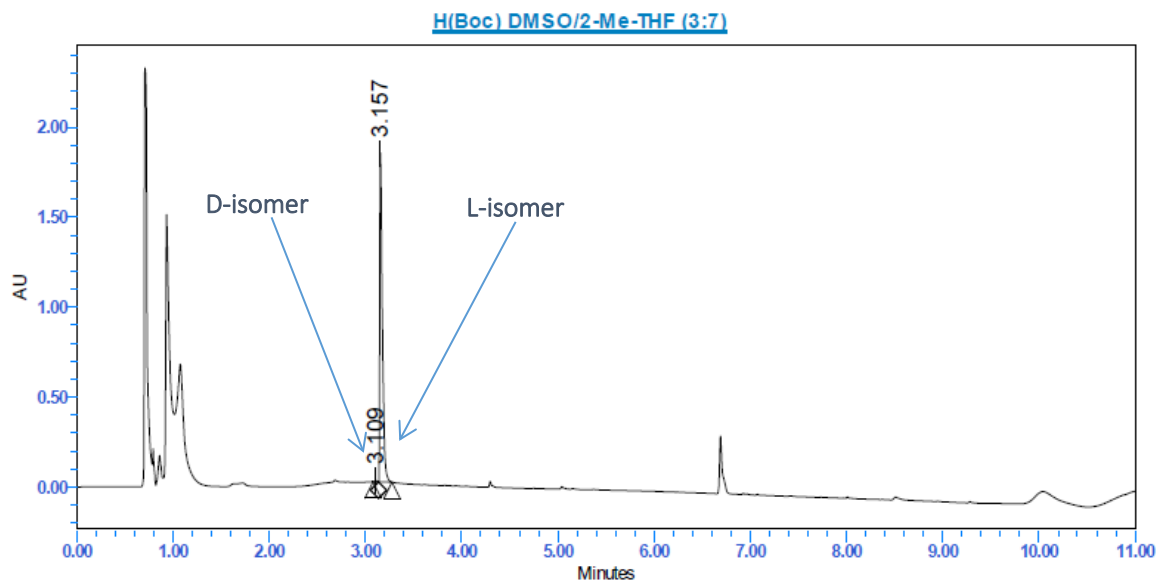

**Peak Results**

| Name | RT    | Area    | Height  | Amount | % Area |
|------|-------|---------|---------|--------|--------|
| 1    | 3.109 | 13451   | 8634    |        | 0.39   |
| 2    | 3.157 | 3434680 | 1829909 |        | 99.61  |

### Amino acid racemisation in DMSO/2-Me-THF (3:7), His(Boc), with spike

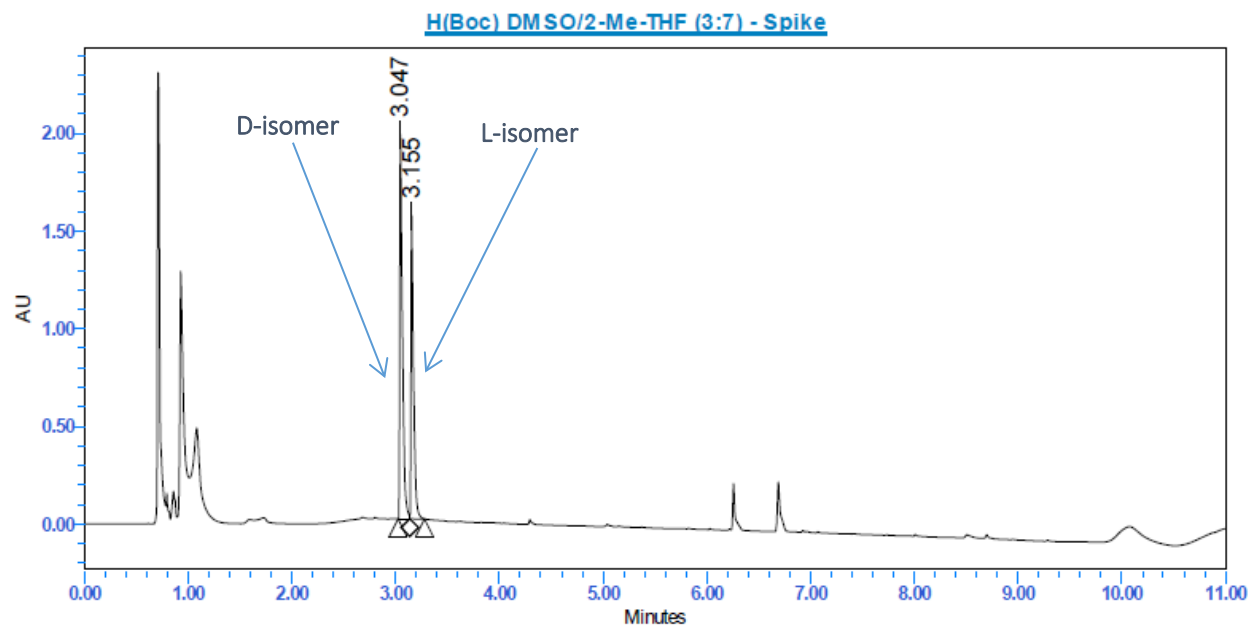

**Peak Results**

| Name | RT    | Area    | Height  | Amount | % Area |
|------|-------|---------|---------|--------|--------|
| 1    | 3.047 | 3644308 | 1967155 |        | 57.98  |
| 2    | 3.155 | 2641564 | 1551705 |        | 42.02  |

### Amino acid racemisation in DMSO/EtOAc (1:9), His(Boc), no spike

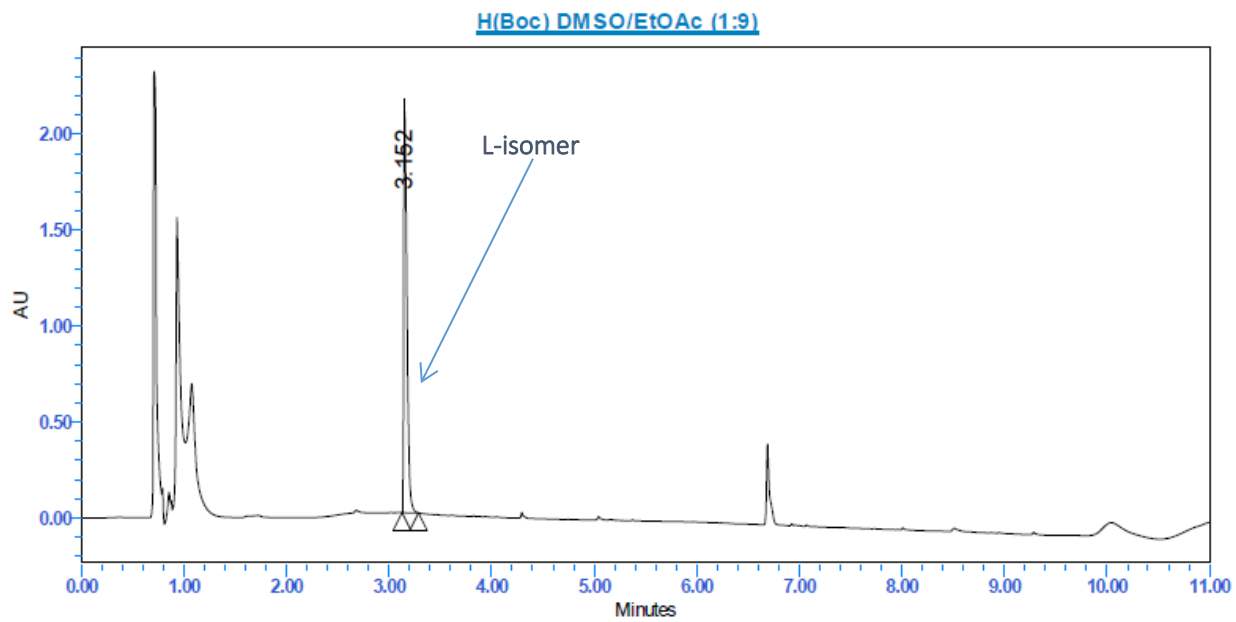

**Peak Results**

| Name | RT    | Area    | Height  | Amount | % Area |
|------|-------|---------|---------|--------|--------|
| 1    | 3.152 | 4618065 | 2092638 |        | 100.00 |

# Amino acid racemisation in DMSO/EtOAc (1:9), His(Boc), with spike

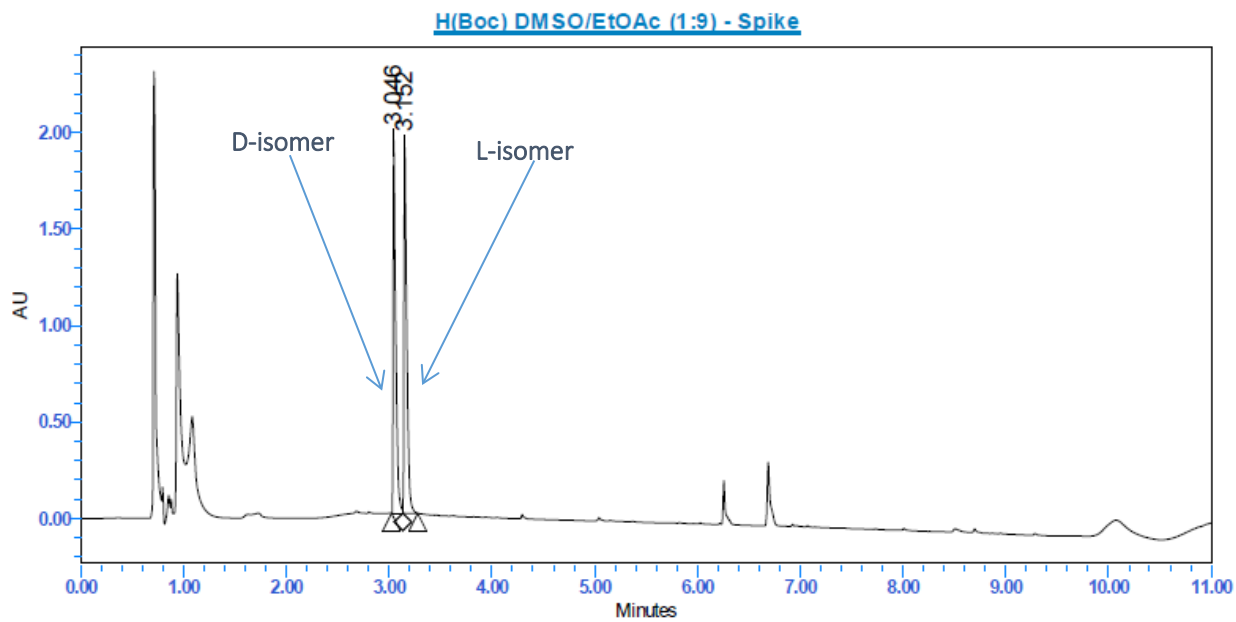

**Peak Results**

| Name | RT    | Area    | Height  | Amount | % Area |
|------|-------|---------|---------|--------|--------|
| 1    | 3.046 | 3484506 | 1931301 |        | 48.93  |
| 2    | 3.152 | 3637489 | 1896250 |        | 51.07  |

### Amino acid racemisation in NBP/DOL (2:8), His(Boc), no spike

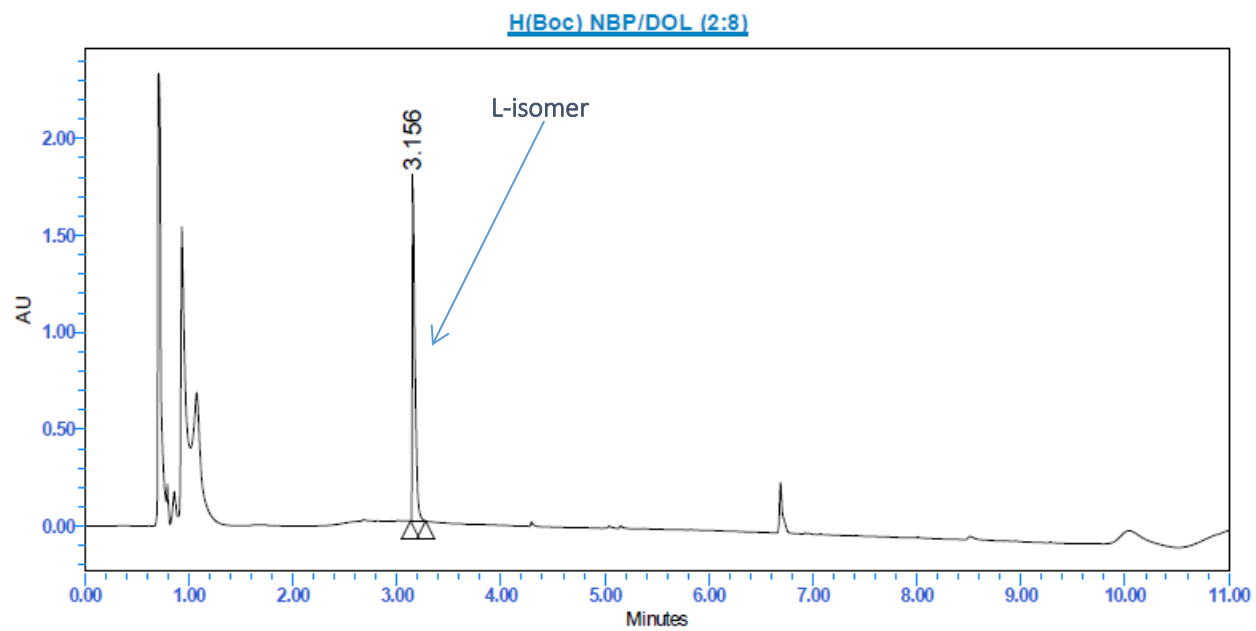

**Peak Results**

| Name | RT    | Area    | Height  | Amount | % Area |
|------|-------|---------|---------|--------|--------|
| 1    | 3.156 | 3089406 | 1719603 |        | 100.00 |



### Amino acid racemisation in NBP/DOL (2:8), His(Boc), with spike

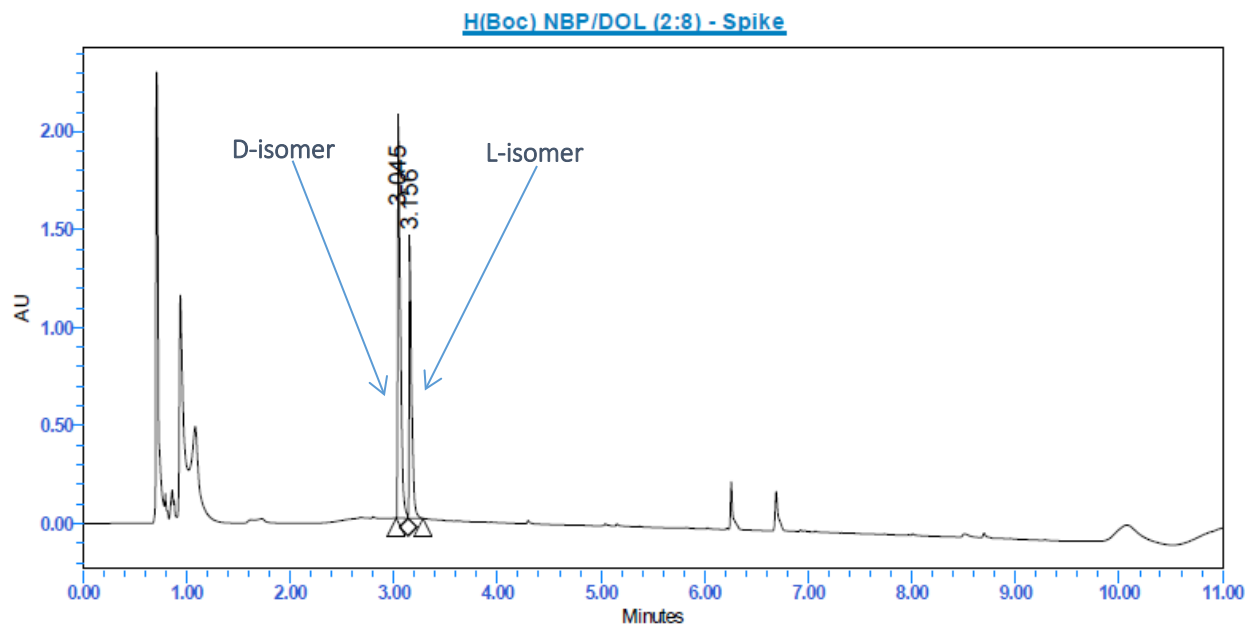

**Peak Results**

| Name | RT    | Area    | Height  | Amount | % Area |
|------|-------|---------|---------|--------|--------|
| 1    | 3.045 | 3765653 | 1996069 |        | 62.41  |
| 2    | 3.156 | 2268549 | 1388977 |        | 37.59  |

### Amino acid racemisation in NBP/DOL (4:6), His(Boc), no spike

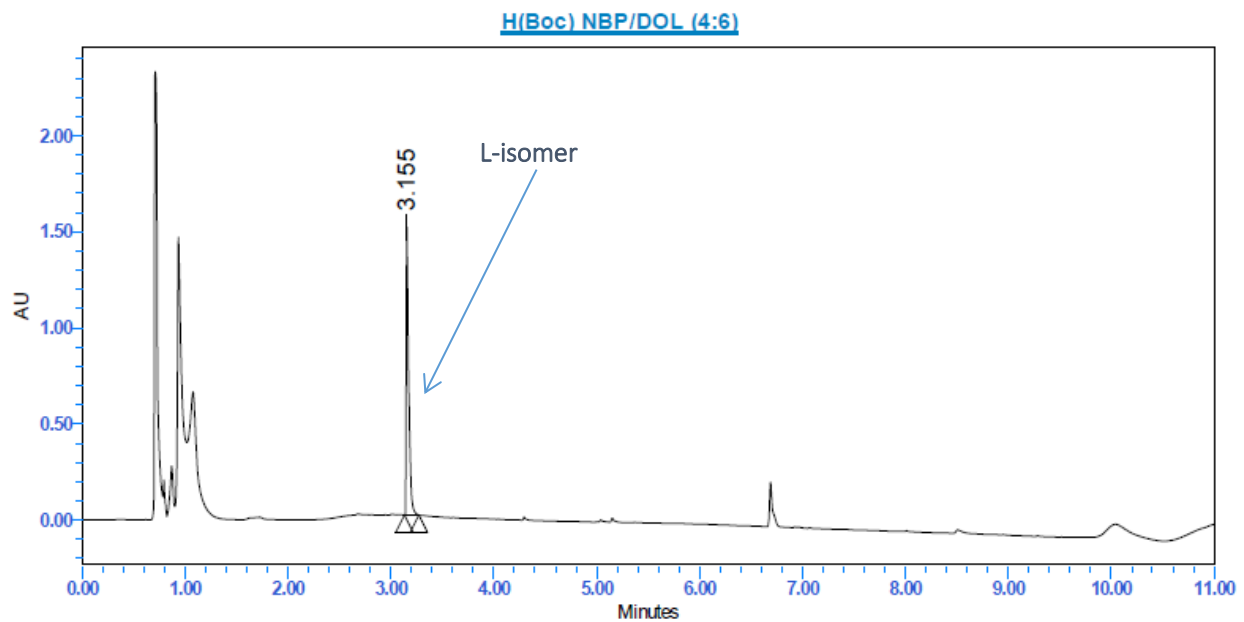

**Peak Results**

|   | Name | RT    | Area    | Height  | Amount | % Area |
|---|------|-------|---------|---------|--------|--------|
| 1 |      | 3.155 | 2518952 | 1497744 |        | 100.00 |

### Amino acid racemisation in NBP/DOL (4:6), His(Boc), with spike

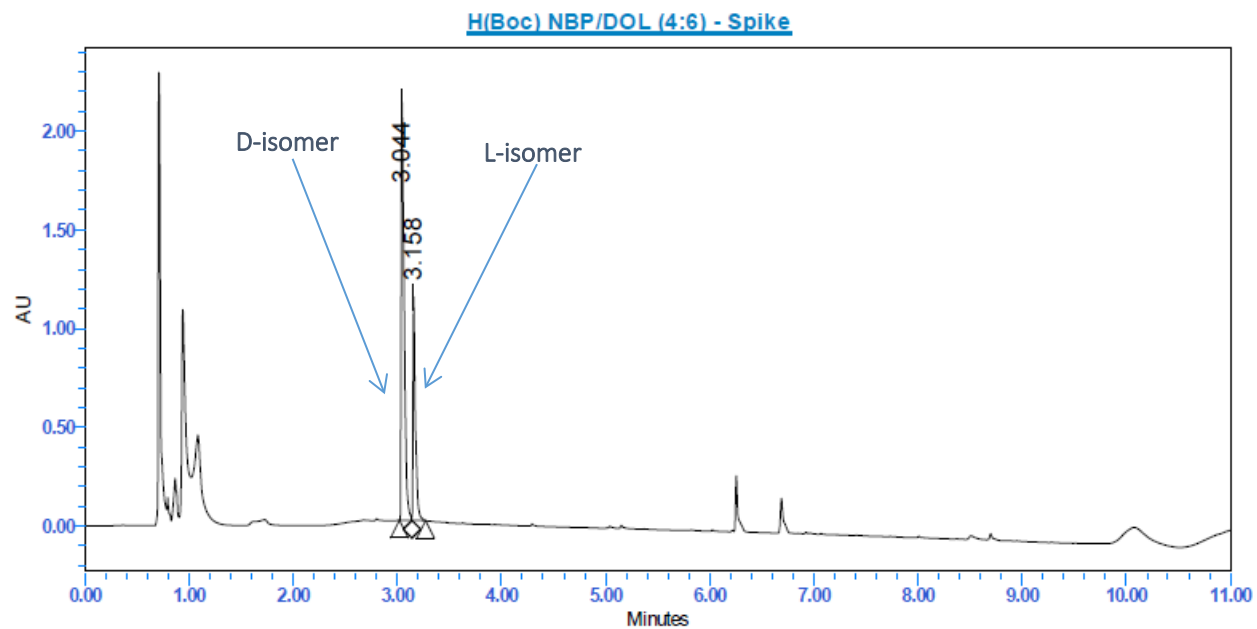

**Peak Results**

| Name | RT    | Area    | Height  | Amount | % Area |
|------|-------|---------|---------|--------|--------|
| 1    | 3.044 | 4360385 | 2118029 |        | 71.29  |
| 2    | 3.158 | 1756344 | 1132456 |        | 28.71  |

### Amino acid racemisation in NFM/DOL (2:8), His(Boc), no spike

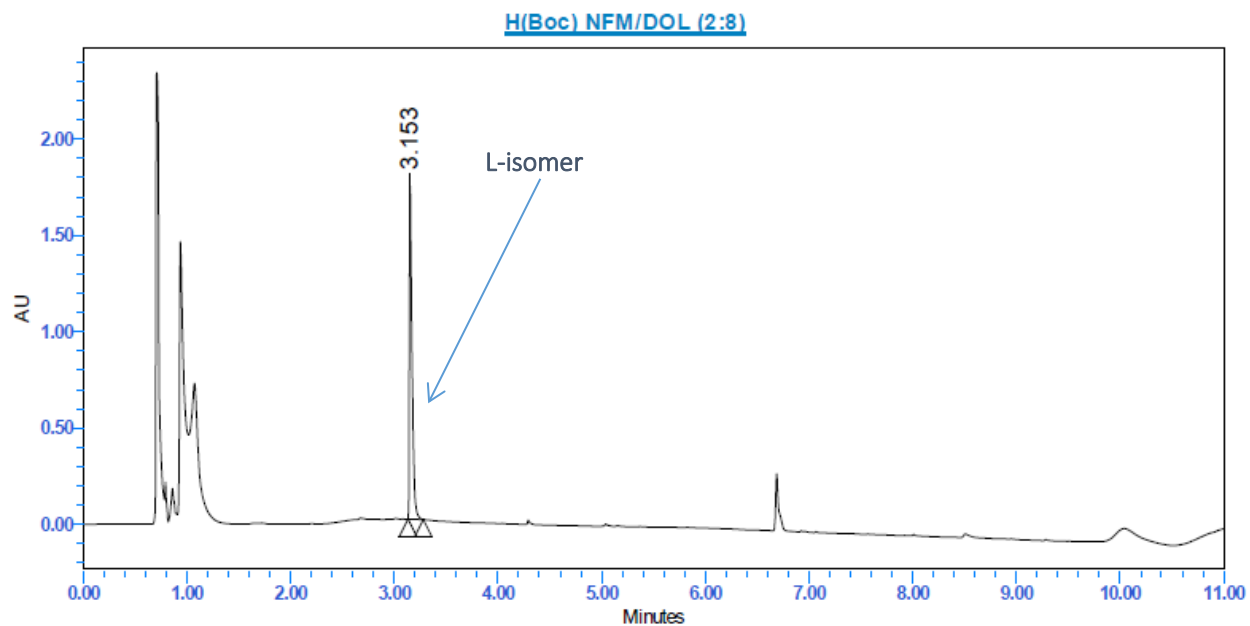

**Peak Results**

| Name | RT    | Area    | Height  | Amount | % Area |
|------|-------|---------|---------|--------|--------|
| 1    | 3.153 | 3115763 | 1730496 |        | 100.00 |

# Amino acid racemisation in NFM/DOL (2:8), His(Boc), with spike

H(Boc) NFM/DOL (2:8) - Spike

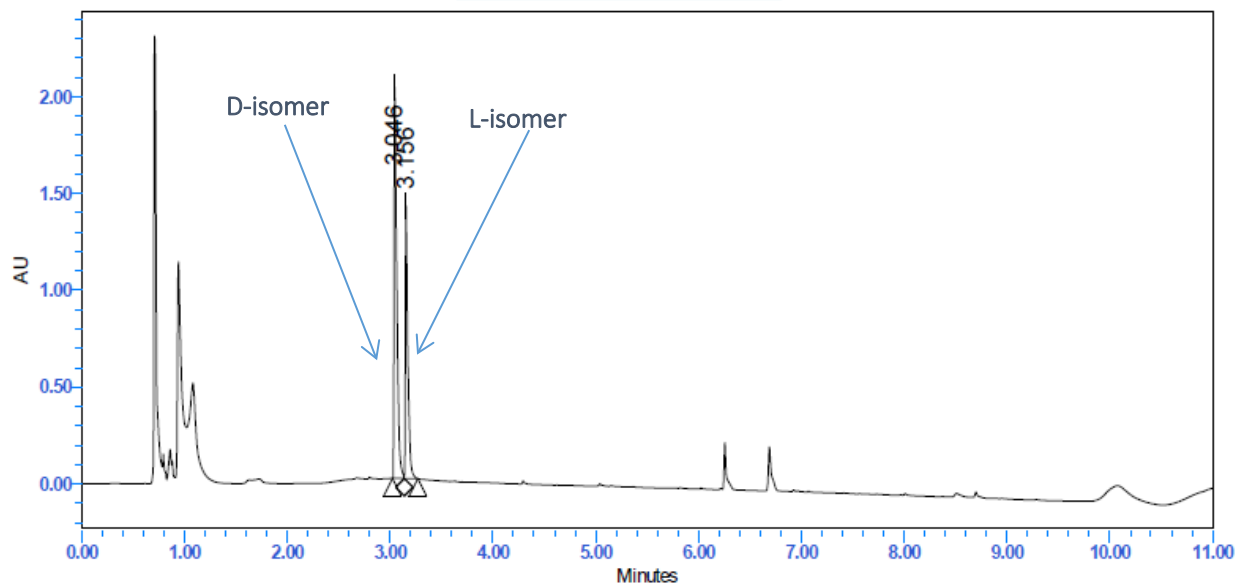

**Peak Results**

| Name | RT    | Area    | Height  | Amount | % Area |
|------|-------|---------|---------|--------|--------|
| 1    | 3.046 | 3839862 | 2019362 |        | 62.64  |
| 2    | 3.156 | 2290555 | 1407067 |        | 37.36  |

### Amino acid racemisation in DMSO/DOL (1:9), His(Boc), no spike

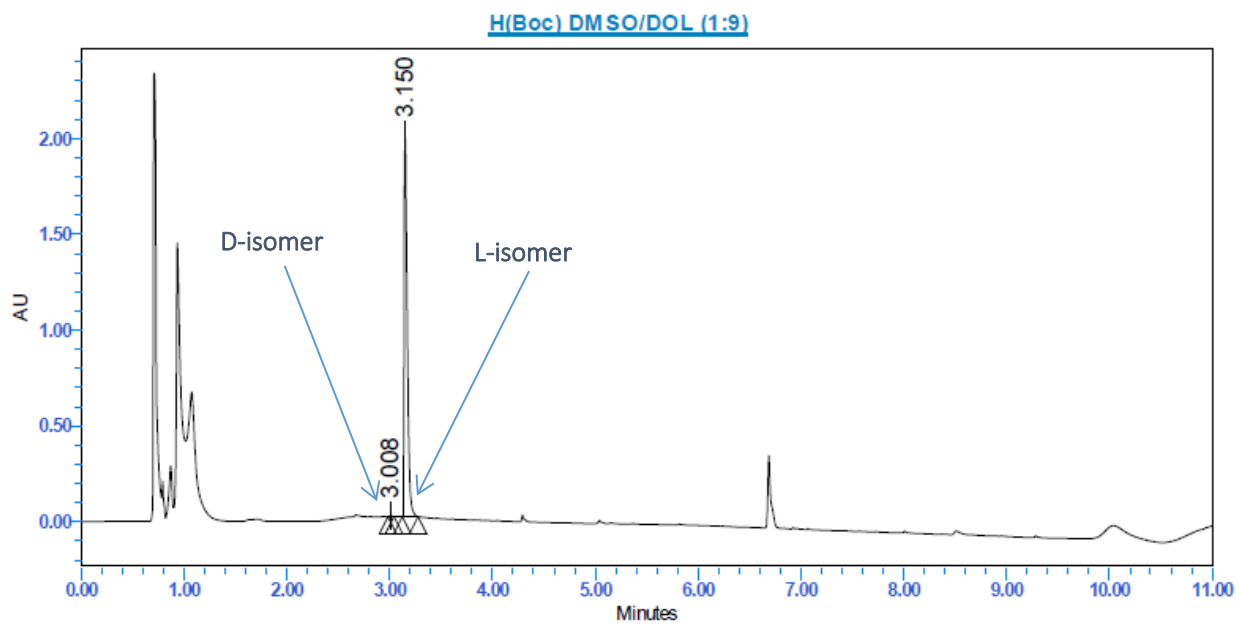

**Peak Results**

| Name | RT    | Area    | Height  | Amount | % Area |
|------|-------|---------|---------|--------|--------|
| 1    | 3.008 | 6318    | 3487    |        | 0.15   |
| 2    | 3.150 | 4101470 | 2005526 |        | 99.85  |

# Amino acid racemisation in DMSO/DOL (1:9), His(Boc), with spike

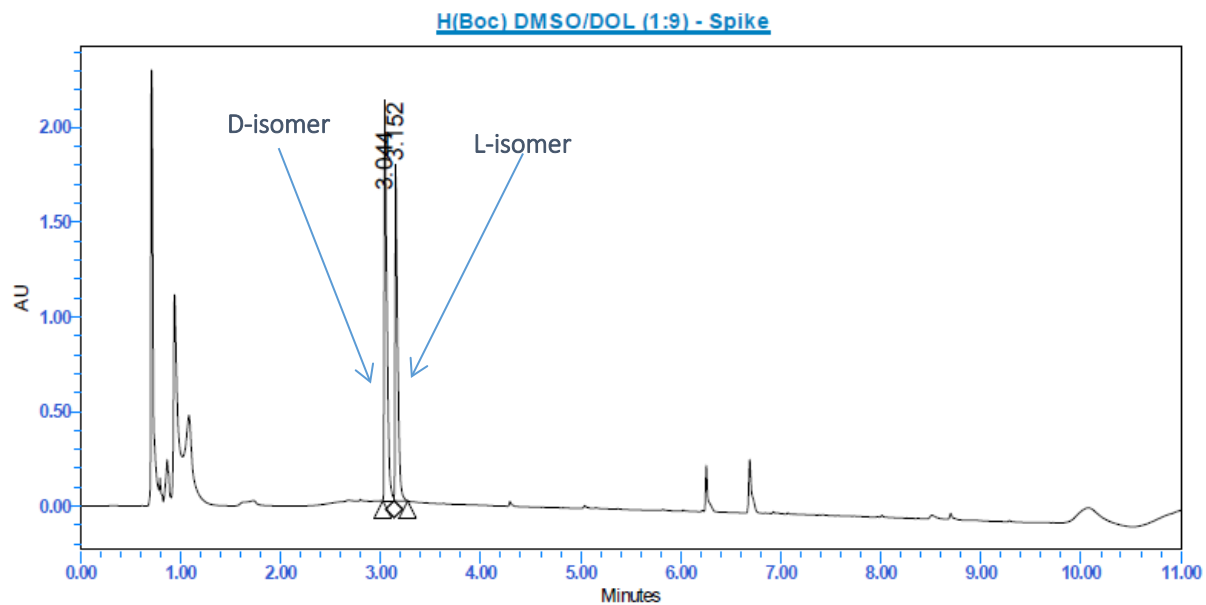

**Peak Results**

| Name | RT    | Area    | Height  | Amount | % Area |
|------|-------|---------|---------|--------|--------|
| 1    | 3.044 | 3912162 | 2049530 |        | 56.45  |
| 2    | 3.152 | 3017698 | 1712864 |        | 43.55  |

# Amino acid racemisation in DMF, Cys(Trt), no spike

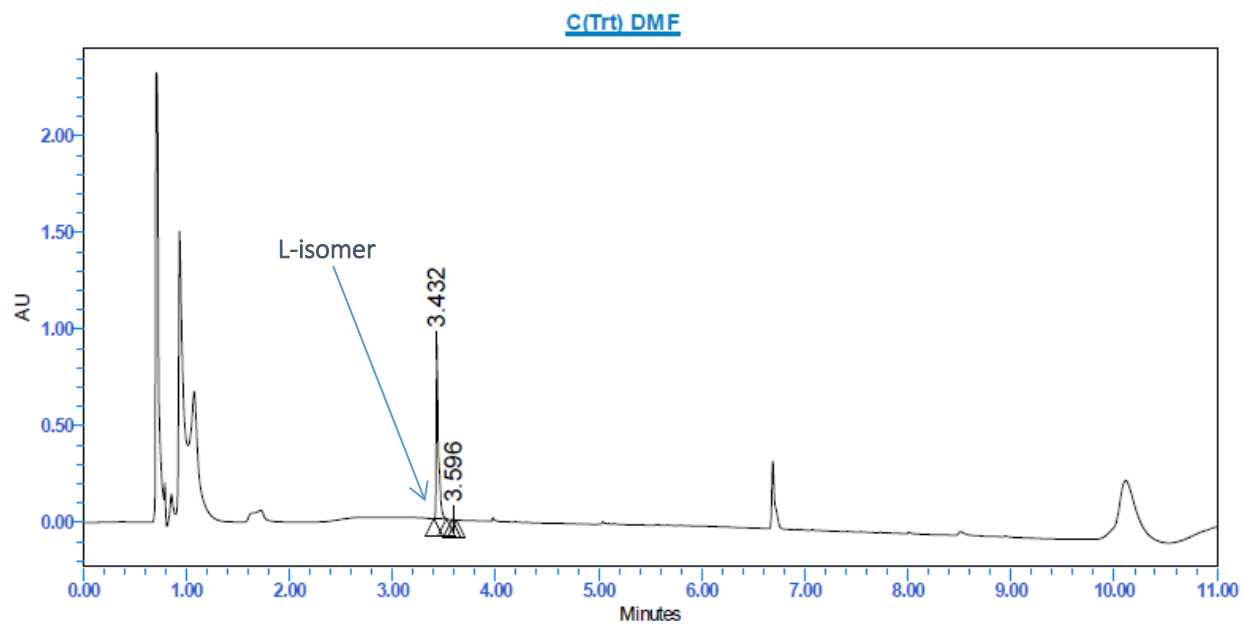

**Peak Results**

| Name | RT    | Area    | Height | Amount | % Area |
|------|-------|---------|--------|--------|--------|
| 1    | 3.432 | 1325531 | 899227 |        | 99.89  |
| 2    | 3.596 | 1513    | 1775   |        | 0.11   |



### Amino acid racemisation in DMF, Cys(Trt), with spike

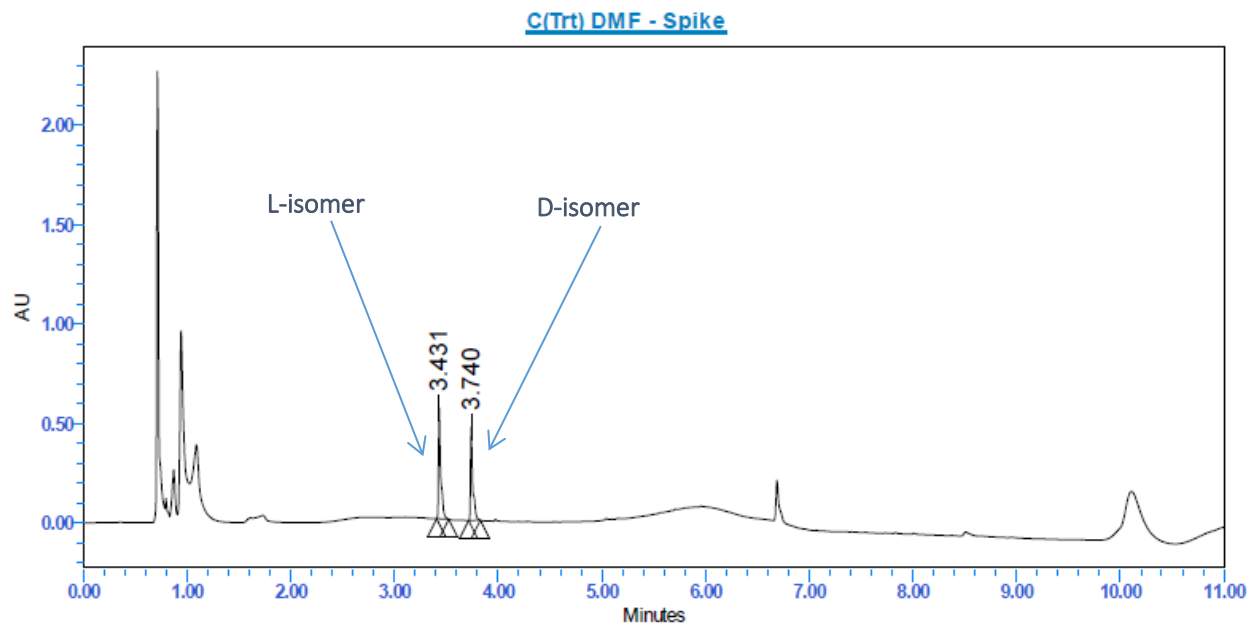

**Peak Results**

| Name | RT    | Area   | Height | Amount | % Area |
|------|-------|--------|--------|--------|--------|
| 1    | 3.431 | 825878 | 557304 |        | 54.58  |
| 2    | 3.740 | 687381 | 469805 |        | 45.42  |

### Amino acid racemisation in DMSO/2-Me-THF (3:7), Cys(Trt), no spike

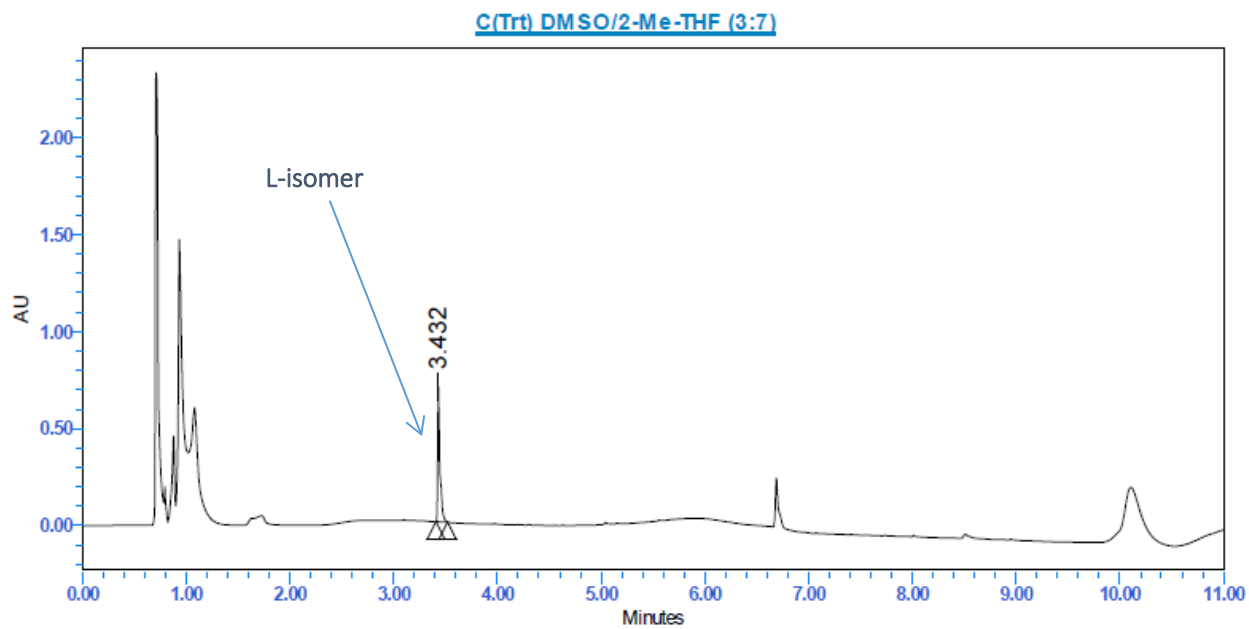

**Peak Results**

| Name | RT    | Area    | Height | Amount | % Area |
|------|-------|---------|--------|--------|--------|
| 1    | 3.432 | 1032232 | 697154 |        | 100.00 |

### Amino acid racemisation in DMSO/2-Me-THF (3:7), Cys(Trt), with spike

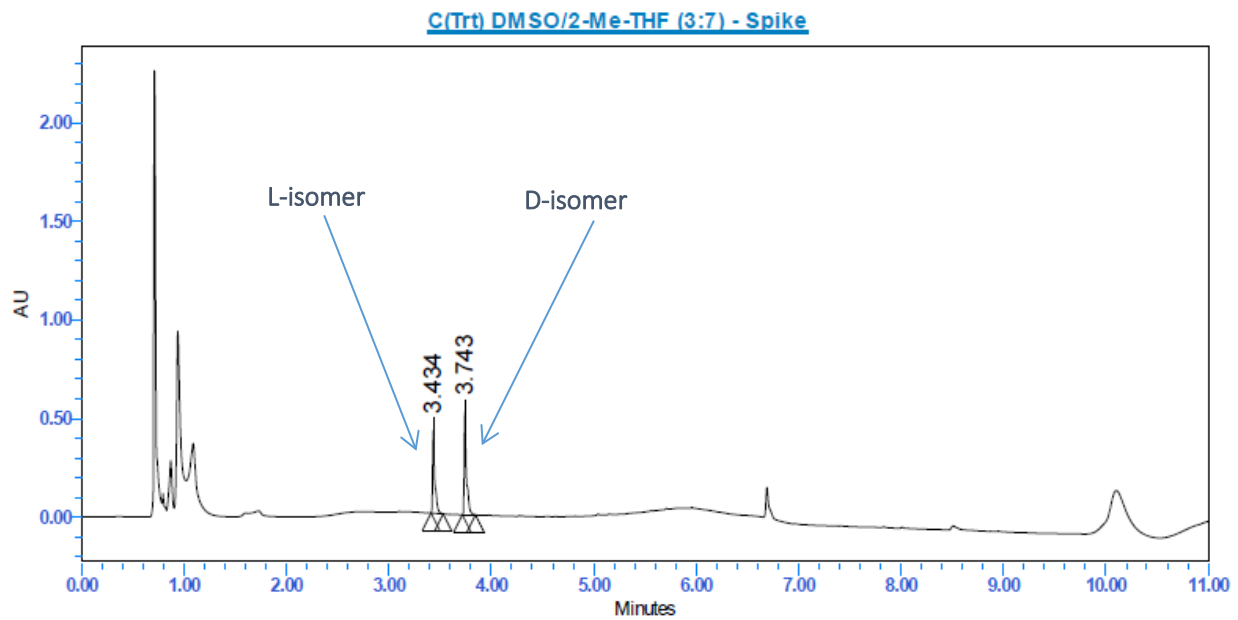

**Peak Results**

| Name | RT    | Area   | Height | Amount | % Area |
|------|-------|--------|--------|--------|--------|
| 1    | 3.434 | 623611 | 418888 |        | 44.64  |
| 2    | 3.743 | 773437 | 522982 |        | 55.36  |

### Amino acid racemisation in DMSO/EtOAc (1:9), Cys(Trt), no spike

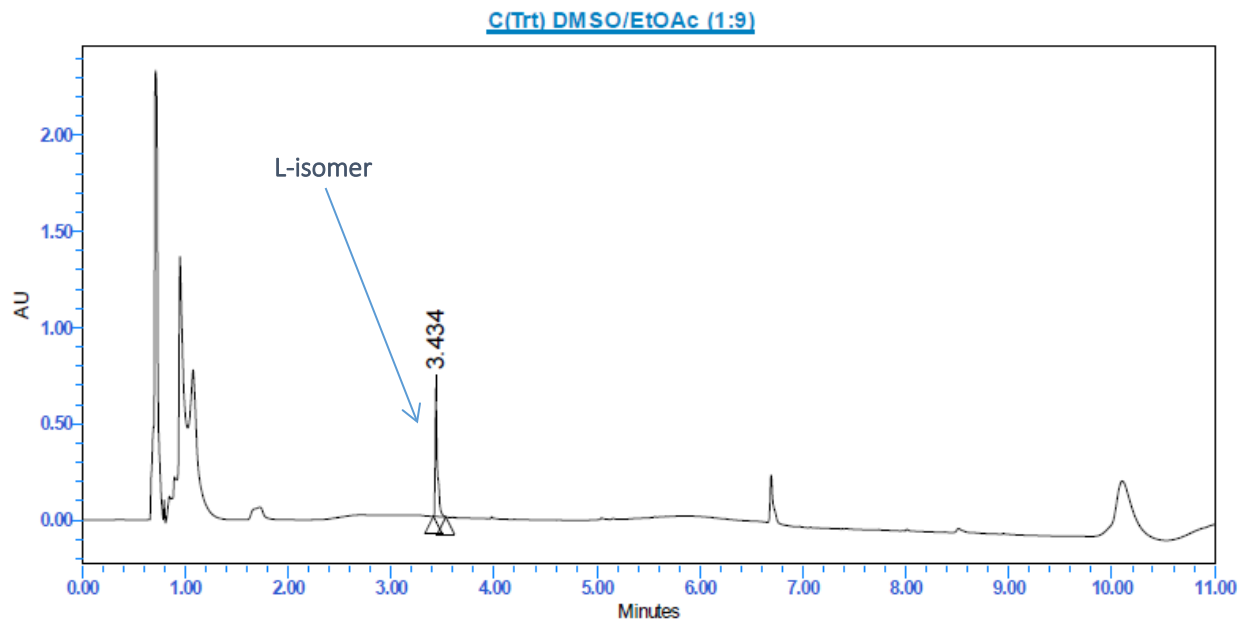

**Peak Results**

|   | Name | RT    | Area   | Height | Amount | % Area |
|---|------|-------|--------|--------|--------|--------|
| 1 |      | 3.434 | 952290 | 669622 |        | 100.00 |

### Amino acid racemisation in DMSO/EtOAc (1:9), Cys(Trt), with spike

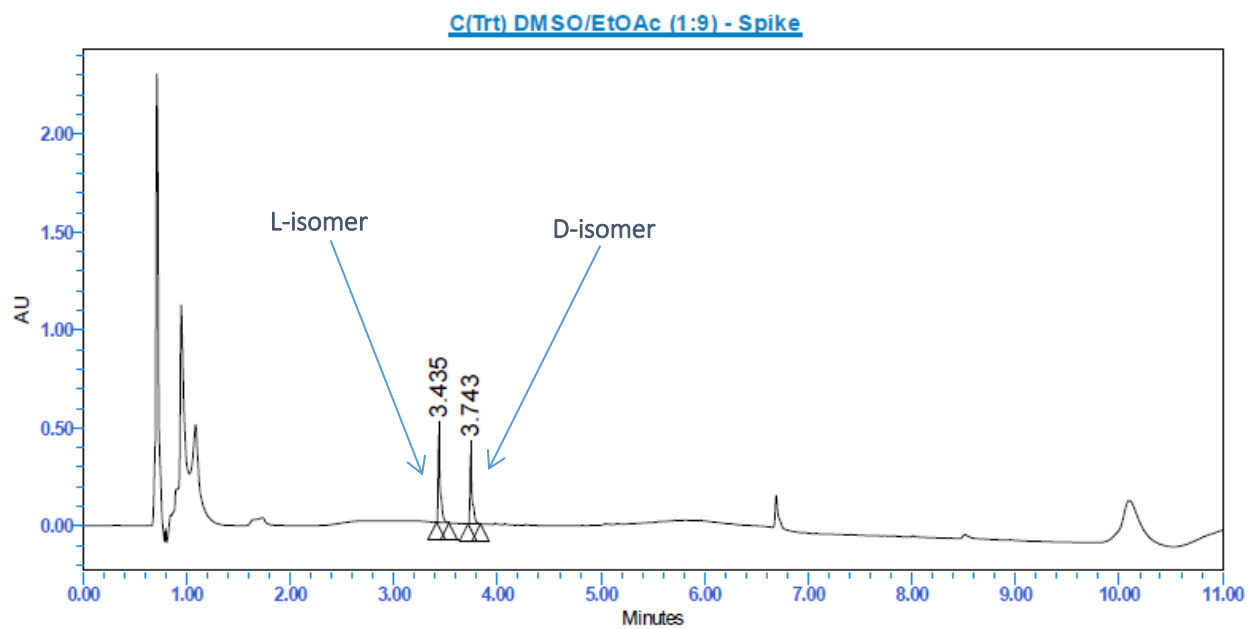

**Peak Results**

| Name | RT    | Area   | Height | Amount | % Area |
|------|-------|--------|--------|--------|--------|
| 1    | 3.435 | 638987 | 445283 |        | 55.33  |
| 2    | 3.743 | 515776 | 357363 |        | 44.67  |

### Amino acid racemisation in NBP/DOL (2:8), Cys(Trt), no spike

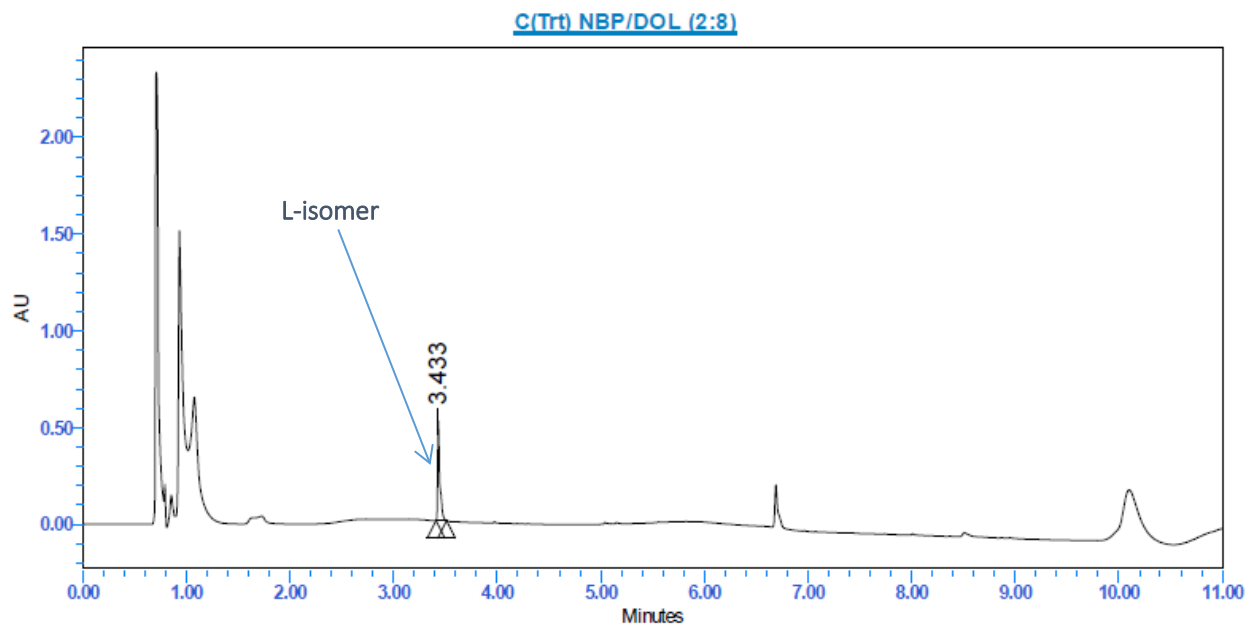

**Peak Results**

| Name | RT    | Area   | Height | Amount | % Area |
|------|-------|--------|--------|--------|--------|
| 1    | 3.433 | 749660 | 514552 |        | 100.00 |

### Amino acid racemisation in NBP/DOL (2:8), Cys(Trt), with spike

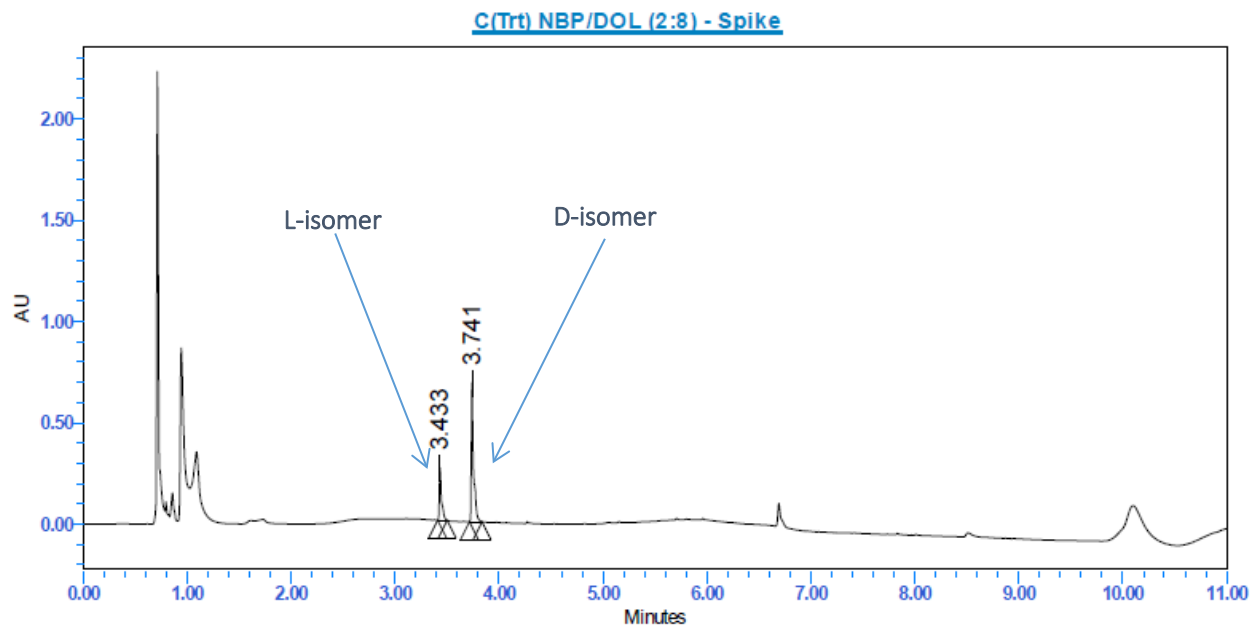

**Peak Results**

| Name | RT    | Area    | Height | Amount | % Area |
|------|-------|---------|--------|--------|--------|
| 1    | 3.433 | 370069  | 258227 |        | 26.89  |
| 2    | 3.741 | 1006231 | 686781 |        | 73.11  |

### Amino acid racemisation in NBP/DOL (4:6), Cys(Trt), no spike

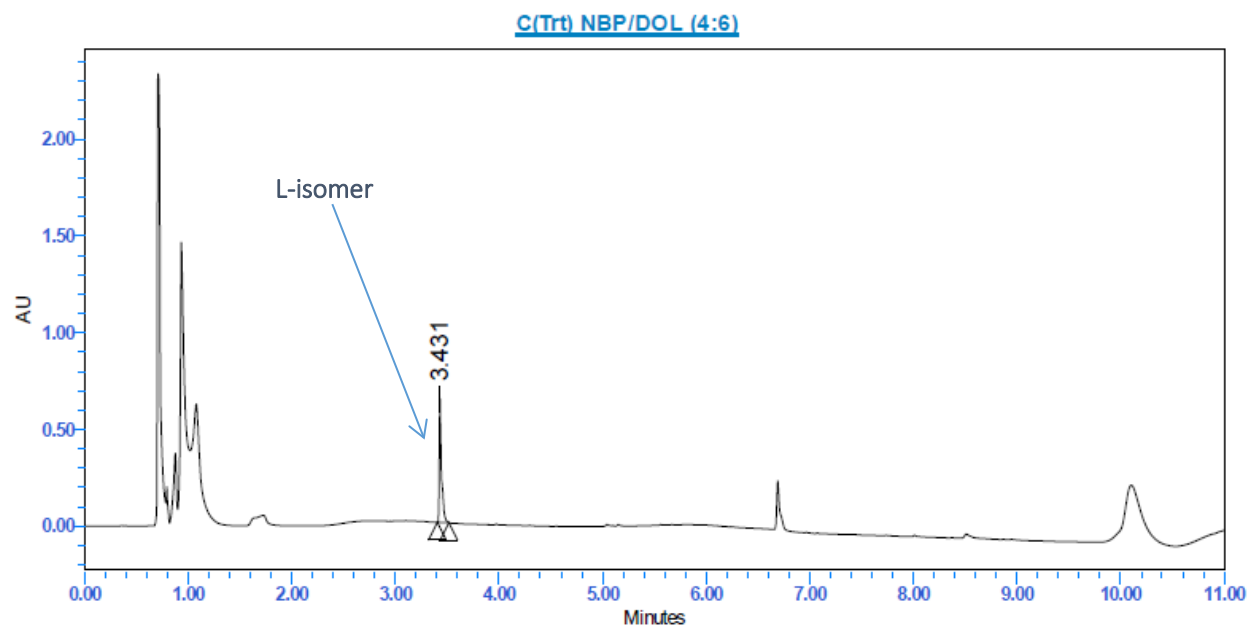

#### Peak Results

| Name | RT    | Area   | Height | Amount | % Area |
|------|-------|--------|--------|--------|--------|
| 1    | 3.431 | 944433 | 639995 |        | 100.00 |



### Amino acid racemisation in NBP/DOL (4:6), Cys(Trt), with spike

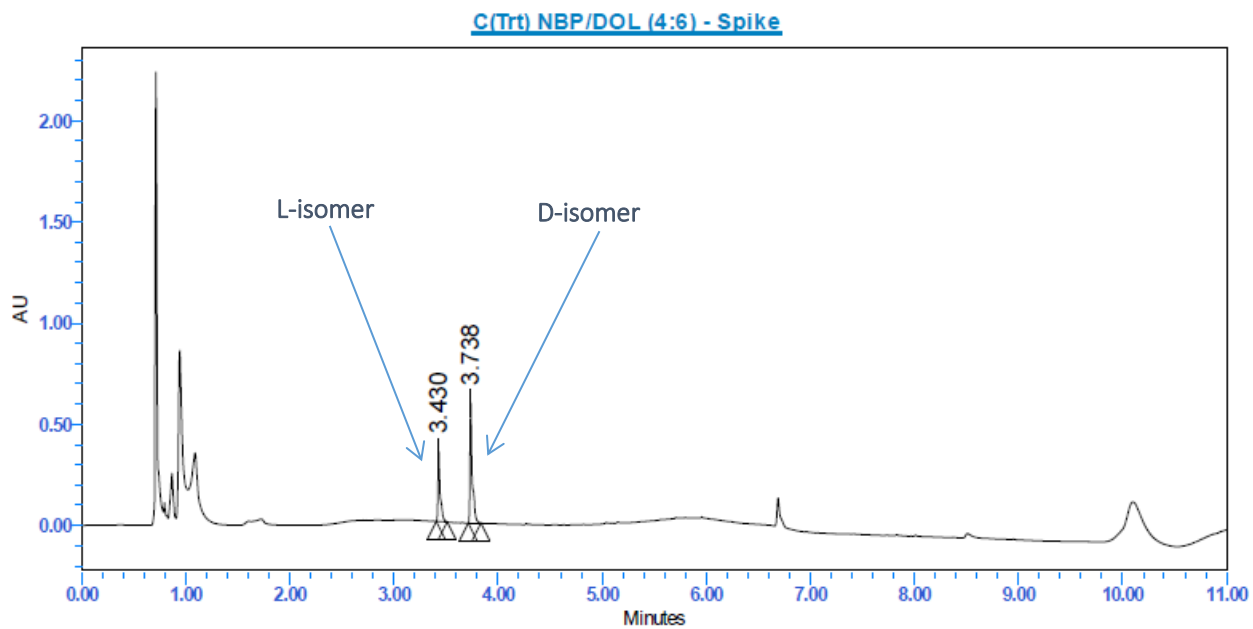

**Peak Results**

| Name | RT    | Area   | Height | Amount | % Area |
|------|-------|--------|--------|--------|--------|
| 1    | 3.430 | 510609 | 347108 |        | 36.76  |
| 2    | 3.738 | 878542 | 596297 |        | 63.24  |

Amino acid racemisation in NFM/DOL (2:8), Cys(Trt), no spike

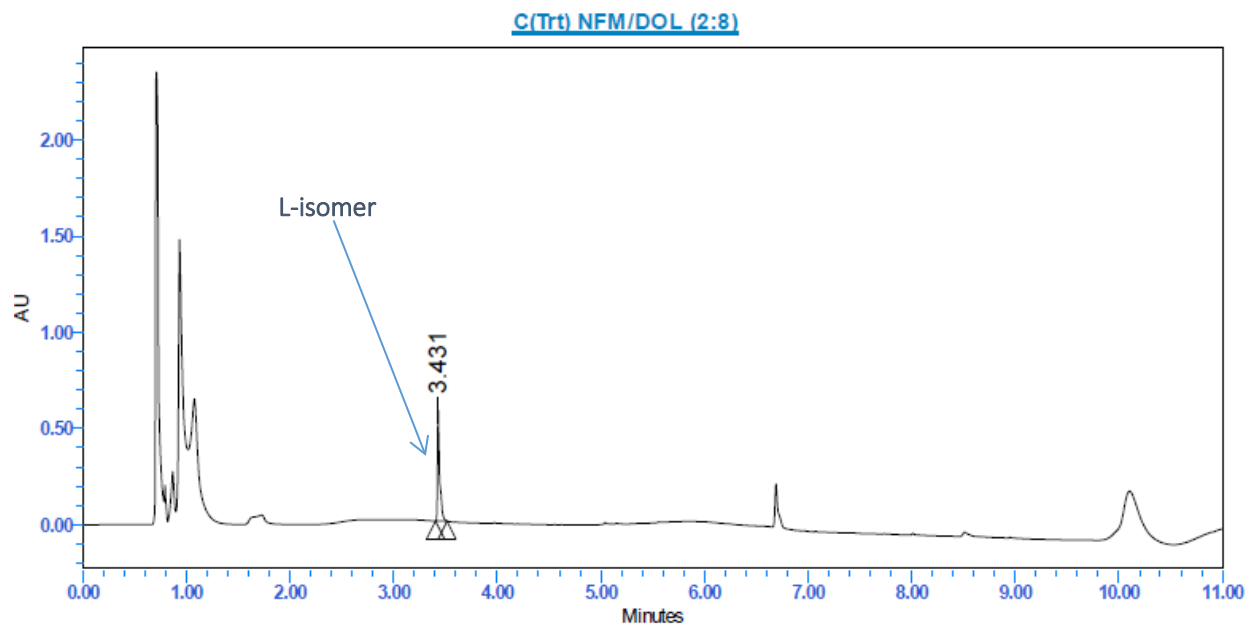

**Peak Results**

|   | Name | RT    | Area   | Height | Amount | % Area |
|---|------|-------|--------|--------|--------|--------|
| 1 |      | 3.431 | 847399 | 576223 |        | 100.00 |

### Amino acid racemisation in NFM/DOL (2:8), Cys(Trt), with spike

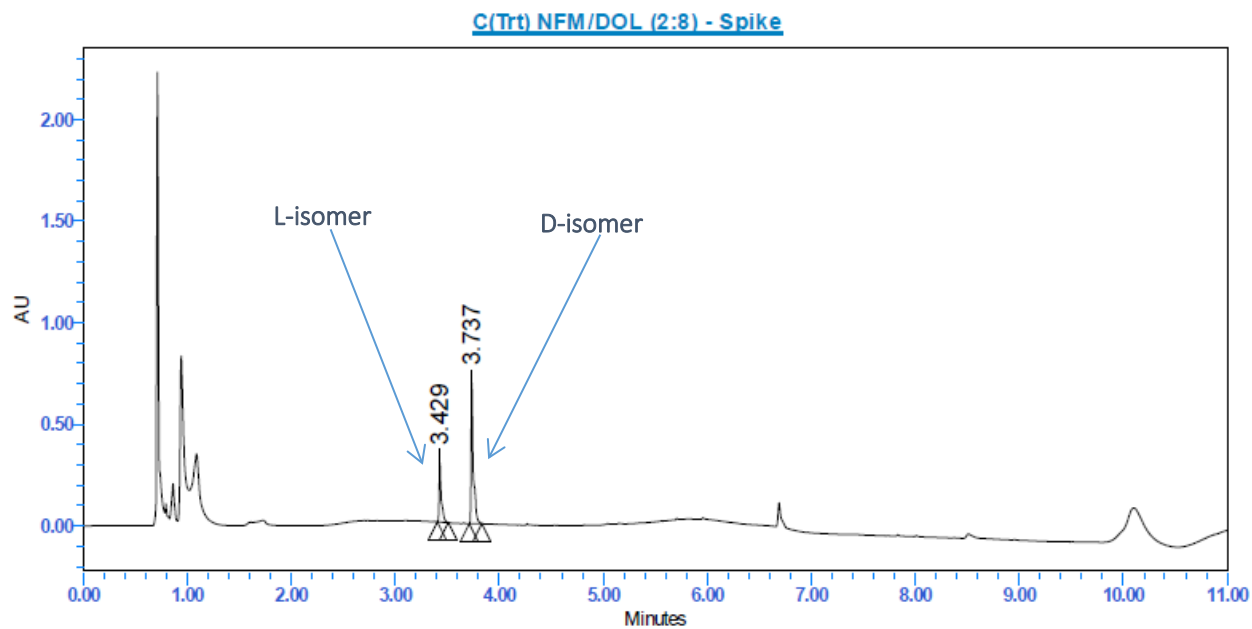

**Peak Results**

| Name | RT    | Area    | Height | Amount | % Area |
|------|-------|---------|--------|--------|--------|
| 1    | 3.429 | 424406  | 292009 |        | 29.51  |
| 2    | 3.737 | 1013545 | 692351 |        | 70.49  |

### Amino acid racemisation in DMSO/DOL (1:9), Cys(Trt), no spike

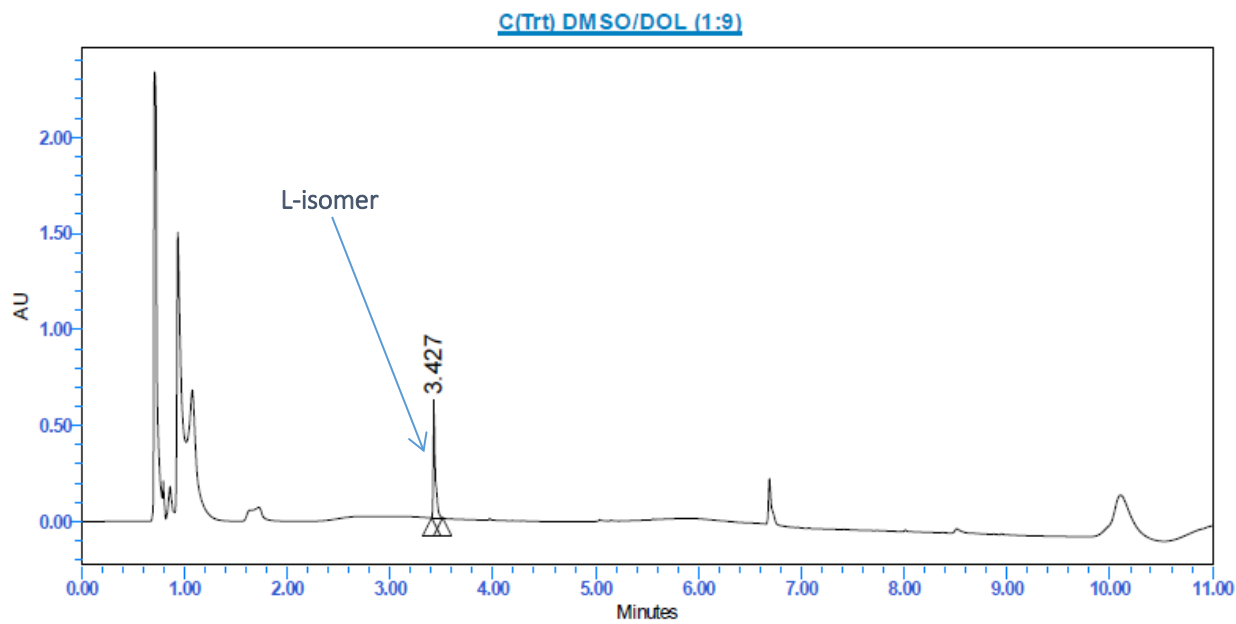

**Peak Results**

| Name | RT    | Area   | Height | Amount | % Area |
|------|-------|--------|--------|--------|--------|
| 1    | 3.427 | 800744 | 549075 |        | 100.00 |

### Amino acid racemisation in DMSO/DOL (1:9), Cys(Trt), with spike

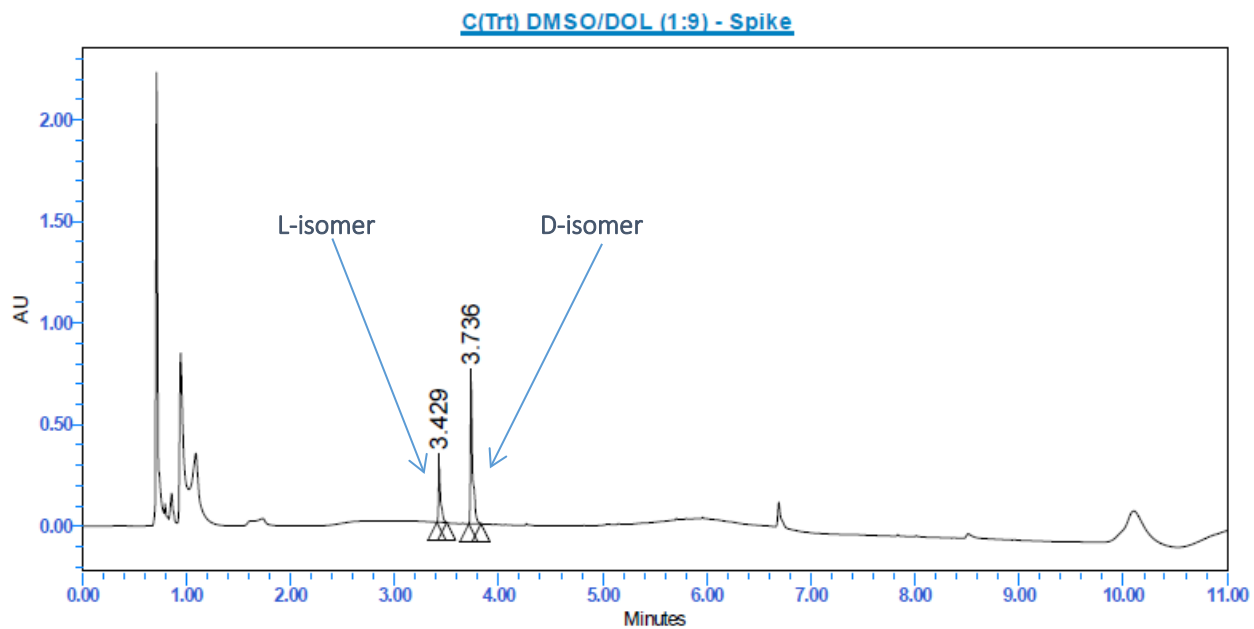

**Peak Results**

| Name | RT    | Area    | Height | Amount | % Area |
|------|-------|---------|--------|--------|--------|
| 1    | 3.429 | 389764  | 271978 |        | 27.60  |
| 2    | 3.736 | 1022291 | 698934 |        | 72.40  |
